# Supplementary material for: Efficient synthesis of α-amino-vinylphosphine oxides from alkyl nitriles via manganese-catalyzed phosphinoenamination
Source: Royal Society of Chemistry journal article supplement (doi:10.1039/d4ob00489b), 2024-01-01

## Supporting Information

### Efficient synthesis of $\alpha$ -amino-vinylphosphine oxides between alkyl nitriles *via* manganese-catalyzed phosphinoenamination

Runbo Sun, Junpeng Yang, Zheng Zhang, Ruihang Luo, Wentao Tang, Xinyu Liu,

Xiaoyong Liu, Anjun Ding, zhengjiang Fu, Shengmei Guo and Hu Cai

### content

|                                                                                        |    |
|----------------------------------------------------------------------------------------|----|
| Supporting Information.....                                                            | 1  |
| 1.Experimental Procedures .....                                                        | 1  |
| 2. Optimization of the Reaction Conditions.....                                        | 2  |
| 3.The examination of other H-P(O)R <sub>2</sub> and nitriles .....                     | 5  |
| 4.Gram-scale reaction.....                                                             | 5  |
| 5. Parallel KIE experiment.....                                                        | 6  |
| 6. Single electron transfer (SET) process detection experiment.....                    | 6  |
| 7. X-Ray diffraction analysis of 3a .....                                              | 14 |
| 8. Copies of product <sup>1</sup> H NMR, <sup>13</sup> C NMR, <sup>31</sup> P NMR..... | 16 |

#### 1.Experimental Procedures

Preparation of free guanidine: On an analytical balance, GuHCl (57 mg, 0.6 mmol, 2.0 equiv.) and <sup>t</sup>BuONa (57.6 mg, 0.6 mmol, 1.0 equiv.) were weighed and added to a dry Schlenk tube (15 mL) with a magnetic stirrer, and was evacuated using a vacuum pump to remove air and then flushed with nitrogen gas. 2 mL of C<sub>2</sub>H<sub>5</sub>OH was added to the Schlenk tube under a nitrogen atmosphere. The tube was sealed and the mixture was stirred for 15 minutes. Then, the mixture was allowed settle into layers, and the upper layer of the clear solution containing guanidine (28.5 mg, 0.3 mmol, 1.0 equiv.) in C<sub>2</sub>H<sub>5</sub>OH (1 mL) was collected.

2 General procedure for the synthesis of  $\alpha$ -amino-vinylphosphine oxides: diphenylphosphine

oxide (60.6 mg, 0.3 mmol, 1.0 equiv.), Mn(OAc)<sub>2</sub> (5.2 mg, 0.03 mmol, 15 mol%) were added to a dry Schlenk tube (15 mL) containing a magnetic stirrer and dissociative guanidine (28.5 mg, 0.3 mmol, 1.0 equiv.). The Schlenk tube was evacuated using a vacuum pump and then flushed with nitrogen gas. Under a nitrogen atmosphere, **1** Methyl 2-cyanoacetate (74.5 mg, 0.75 mmol, 2.5 equiv.) and 1,4-dioxane (2 mL) were added to the Schlenk tube. The reaction mixture was then stirred at 60°C for 12 hours. The progress was monitored by thin-layer chromatography (TLC). The product was concentrated by distillation under reduced pressure and further purified by column chromatography using silica gel with a petroleum ether/ethyl acetate eluent.

## 2. Optimization of the Reaction Conditions

**Table S1. Catalyst Screening<sup>a</sup>**

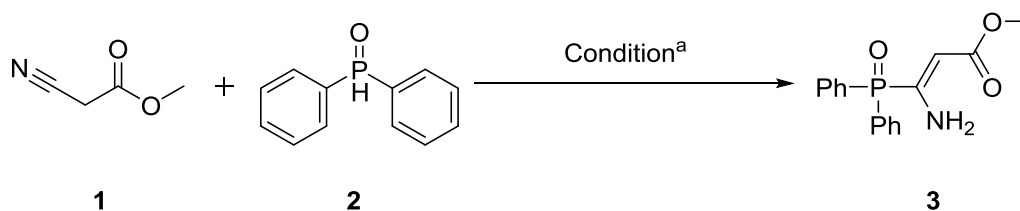

| Entry | Catalyst                                           | mol% | Yield(%) |
|-------|----------------------------------------------------|------|----------|
| 1     | Mn(OAc) <sub>2</sub>                               | 15%  | 95%      |
| 2     | Mn(OAc) <sub>2</sub>                               | 10%  | 82%      |
| 3     | Mn(OAc) <sub>2</sub>                               | 5%   | 59%      |
| 4     | Mn(OAc) <sub>2</sub>                               | 1%   | 23%      |
| 5     | Mn(ClO <sub>4</sub> ) <sub>2</sub>                 | 10%  | 32%      |
| 6     | MnCl <sub>2</sub>                                  | 10%  | 41%      |
| 7     | Mn(C <sub>2</sub> O <sub>4</sub> ) <sub>2</sub>    | 10%  | 50%      |
| 8     | Mn(acac) <sub>3</sub>                              | 10%  | 34%      |
| 9     | Mn(CO) <sub>12</sub>                               | 10%  | 20%      |
| 10    | Mn(OAc) <sub>3</sub>                               | 10%  | 47%      |
| 11    | Ni(OAc) <sub>2</sub>                               | 10%  | 20%      |
| 12    | NiBr <sub>2</sub>                                  | 10%  | 17%      |
| 13    | Ni(PPh <sub>2</sub> ) <sub>2</sub> Cl <sub>2</sub> | 10%  | 35%      |
| 14    | NiF <sub>2</sub>                                   | 10%  | 21%      |
| 15    | Ni(OTf) <sub>2</sub>                               | 10%  | 70%      |
| 16    | Cu(OTf) <sub>2</sub>                               | 10%  | 11%      |

|    |                      |     |     |
|----|----------------------|-----|-----|
| 17 | CoCl <sub>2</sub>    | 10% | 17% |
| 18 | Pd(OAc) <sub>2</sub> | 10% | 59% |

<sup>a</sup> Reaction conditions: **1** (74.5 mg, 0.75 mmol), **2** (60.6mg, 0.3 mmol, 1.0 equiv.), Catalyst (15 mol%), base (0.3 mmol, 1.0 equiv.), 1,4-dioxane (3 mL) were mixed at 60°C under N<sub>2</sub> for 12 h.

**Table S2. Base Screening <sup>a</sup>**

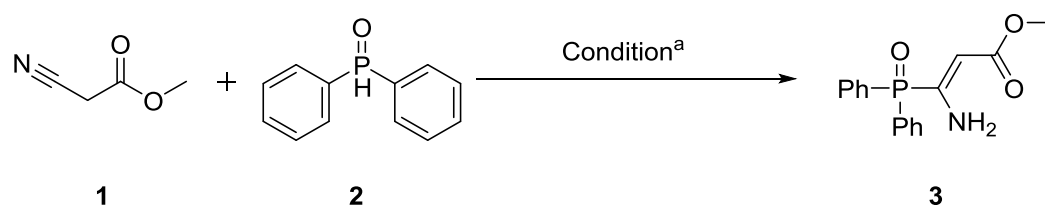

| Entry          | base                            | n          | Yield(%) |
|----------------|---------------------------------|------------|----------|
| 1 <sup>b</sup> | guanidine                       | 1.0 equiv. | 95%      |
| 2              | DABCO                           | 1.0 equiv. | 30%      |
| 3              | tBuOK                           | 1.0 equiv. | 43%      |
| 4              | Na <sub>2</sub> CO <sub>3</sub> | 1.0 equiv. | 20%      |
| 5              | DIPEA                           | 1.0 equiv. | 27%      |
| 6              | NaOH                            | 1.0 equiv. | 33%      |
| 7              | KOH                             | 1.0 equiv. | 35%      |

<sup>a</sup> Reaction conditions : **1** (74.5 mg, 0.75 mmol, 2.5 equiv.), **2** (60.6mg, 0.3 mmol, 1.0 equiv.), Mn(OAc)<sub>2</sub> (15 mol%), base (0.3 mmol), 1,4-dioxane (3 mL) were mixed at 60°C under N<sub>2</sub> for 12 h. <sup>b</sup> Dissociative guanidine.

**Table S3. Time and Temperatures Screening <sup>a</sup>**

| Entry | Time | Temperatures | yield(%) |
|-------|------|--------------|----------|
| 1     | 12 h | 60°C         | 95%      |
| 2     | 9 h  | 60°C         | 72%      |
| 3     | 18 h | 60°C         | 90%      |

|   |      |       |     |
|---|------|-------|-----|
| 4 | 12 h | 120°C | 86% |
| 5 | 12 h | 80°C  | 88% |
| 6 | 12h  | 40°C  | 70% |

<sup>a</sup> Reaction conditions: **1** (74.5 mg, 0.75 mmol, 2.5 equiv.), **2** (60.6mg, 0.3 mmol, 1.0 equiv.), Mn(OAc)<sub>2</sub> (15 mol%), guanidine (0.3 mmol), 1,4-dioxane (3 mL) were mixed under N<sub>2</sub>.

**Table S4. Solvent Screening <sup>a</sup>**

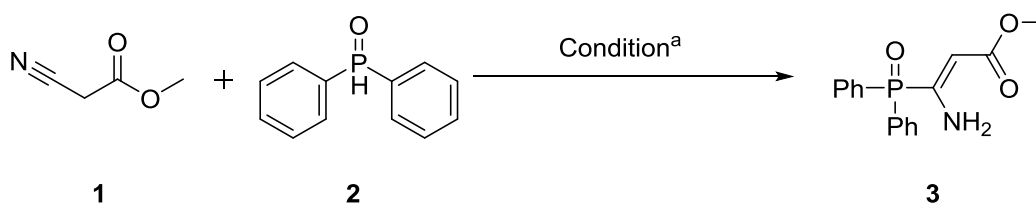

| Entry | Catalyst             | Solvent            | Yield(%) |
|-------|----------------------|--------------------|----------|
| 1     | Mn(OAc) <sub>2</sub> | 1,4-dioxane        | 95%      |
| 2     | Mn(OAc) <sub>2</sub> | DCM                | 20%      |
| 3     | Mn(OAc) <sub>2</sub> | DCE                | 17%      |
| 4     | Mn(OAc) <sub>2</sub> | CH <sub>3</sub> OH | 33%      |
| 5     | Mn(OAc) <sub>2</sub> | CH <sub>3</sub> CN | 30%      |
| 6     | Mn(OAc) <sub>2</sub> | DMF                | 26%      |
| 7     | Mn(OAc) <sub>2</sub> | DMAc               | 10%      |
| 8     | Mn(OAc) <sub>2</sub> | THF                | Nr.      |
| 9     | Mn(OAc) <sub>2</sub> | DMSO               | Nr.      |
| 10    | Mn(OAc) <sub>2</sub> | Tol.               | Nr.      |

<sup>a</sup> Reaction conditions : **1** (74.5 mg, 0.75 mmol, 2.5 equiv.), **2** (60.6mg, 0.3 mmol, 1.0 equiv.), Mn(OAc)<sub>2</sub> (15 mol%), guanidine (0.3 mmol, 1.0 equiv.), Solvent (3 mL) were mixed at 60°C under N<sub>2</sub> for 12 h;

### 3. The examination of other H-P(O)R<sub>2</sub> and nitriles

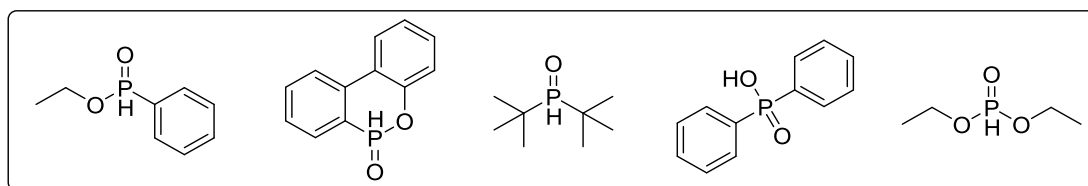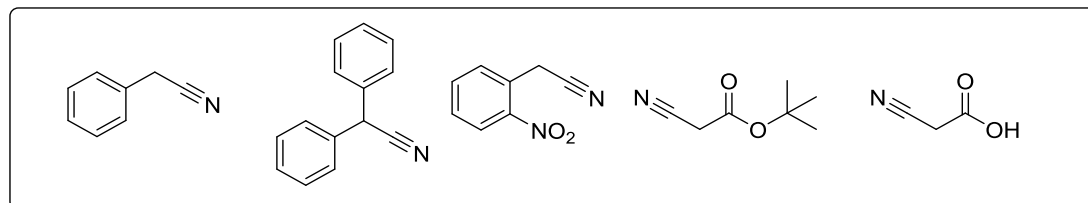

No Reaction

### 4. Gram-scale reaction

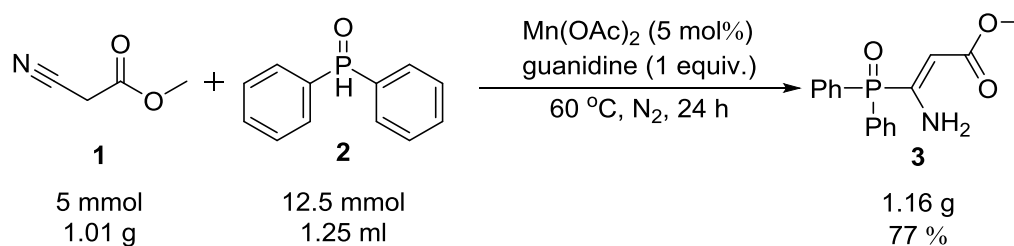

Diphenylphosphine oxide **1** (1.01 g, 5 mmol, 1.0 equiv.), Mn(OAc)<sub>2</sub> (61 mg, 0.25 mmol, 5 mol%) and guanidine (300 mg, 5 mmol, 1.0 equiv.) in C<sub>2</sub>H<sub>5</sub>OH (1 mL) were added to a dry Schlenk tube (100 mL) with a magnetic stirrer. The C<sub>2</sub>H<sub>5</sub>OH in the Schlenk tube was evacuated using a vacuum pump to remove any remaining air, then flushed with nitrogen gas. Under a nitrogen atmosphere, Methyl 2-cyanoacetate **2** (12.5 ml, 1.25 mmol, 2.5 equiv.) and 1,4-dioxane (20 mL) were added to the Schlenk tube and sealed. The reaction mixture was then stirred at 60 °C for 12 hours, after which the heating was turned off. The reaction was allowed to cool to room temperature. The product was concentrated by distillation under reduced pressure and further purified by column chromatography using silica gel. The product was purified using silica gel column chromatography with a petroleum ether/ethyl acetate eluent, 1.16 g of product **3** was obtained, with a yield of 77%.

## 5. Parallel KIE experiment

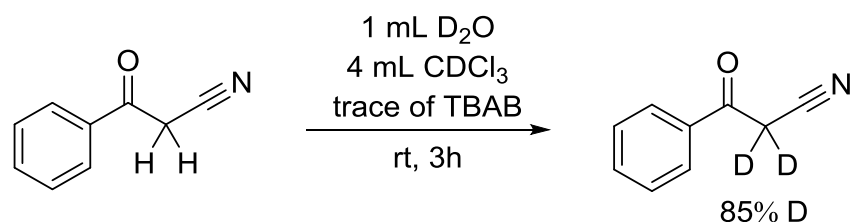

3-Oxo-3-phenylpropanenitrile (145 mg, 1 mmol, 1 equiv.) and TBAB (32.2 mg, 0.1 mmol, 0.1 equiv.) were added to a dry Schlenk tube (15 mL) with a magnetic stirrer under N<sub>2</sub>. D<sub>2</sub>O (1 ml) and CDCl<sub>3</sub> (4 ml) was added to the Schlenk tube under a nitrogen atmosphere. The reaction was performed at room temperature for 3 hours and distill under reduced pressure to obtain 85% D products.

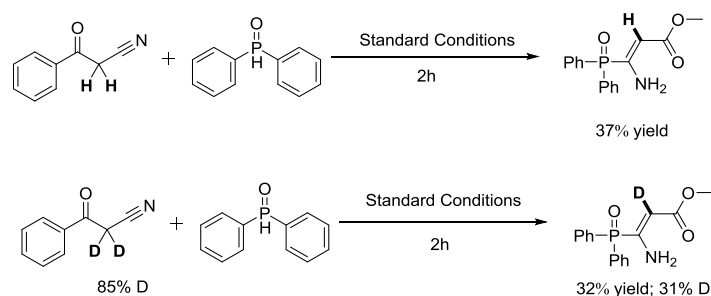

## 6. Single electron transfer (SET) process detection experiment

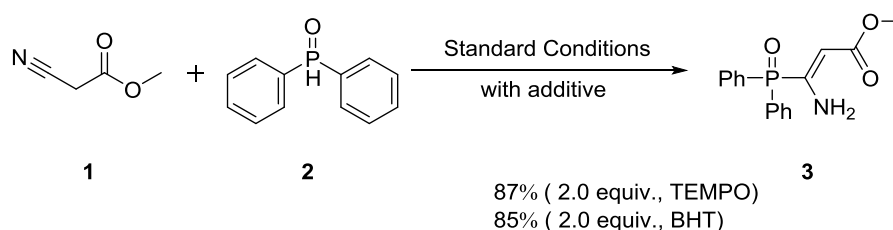

**Methyl 3-amino-3-(diphenylphosphoryl)acrylate (3).** The title compound was prepared according to the general procedure and purified by column chromatography to give white solid (87.1 mg), 95% yield (Z:E = 1:1) (petroleum ether/ethyl acetate = 1:1). <sup>1</sup>H NMR (400 MHz, CDCl<sub>3</sub>) δ (ppm) 7.73 (m, J = 12.4, 8.3, 1.4 Hz, 4H), 7.62 – 7.55 (m, 2H), 7.49 (td, J = 7.6, 3.2 Hz, 4H), 6.87 (s, 2H), 4.73 (d, J = 13.6 Hz, 1H), 3.64 (s, 3H). <sup>13</sup>C NMR (101 MHz, CDCl<sub>3</sub>) δ (ppm) 169.03 (d, J = 21.1 Hz), 154.48, 153.51, 132.85 (d, J = 2.8 Hz), 132.11, 132.01, 128.84, 128.71, 92.08 (d, J = 16.5 Hz), 50.74; <sup>31</sup>P NMR (162 MHz, CDCl<sub>3</sub>) δ (ppm) 28.08.; HRMS (ESI) (m/z): calcd for C<sub>16</sub>H<sub>16</sub>NO<sub>3</sub>P [M+H]<sup>+</sup>: 302.0946, found: 302.0944.

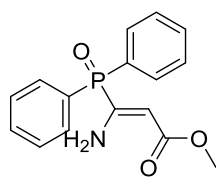

**(Methyl 3-amino-3-(di-*p*-tolylphosphoryl)acrylate) (4).** The title compound was prepared according to the general procedure and purified by column chromatography to give white solid (86.8 mg), 88% yield (*Z*:*E* = 1:1) (petroleum ether/ethyl acetate = 1:1). <sup>1</sup>H NMR (400 MHz, CDCl<sub>3</sub>) δ (ppm) 7.62 (dd, *J* = 12.3, 8.1 Hz, 4 H), 7.29 (dd, *J* = 7.9, 2.4 Hz, 4H), 6.81 (s, 1H), 4.72

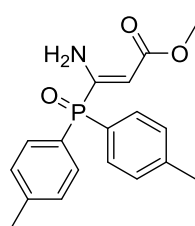

(d, *J* = 13.6 Hz, 1H), 3.65 (s, 3H), 2.41 (s, 6H). <sup>13</sup>C NMR (101 MHz, CDCl<sub>3</sub>) δ (ppm) 169.09 (d, *J* = 20.8 Hz), 155.15, 154.18, 143.44 (d, *J* = 3.0 Hz), 132.11, 132.00, 129.53, 129.40, 126.71, 125.63, 91.68 (d, *J* = 16.4 Hz), 50.65, 21.63; <sup>31</sup>P NMR (162 MHz, CDCl<sub>3</sub>) δ (ppm) 28.36.; HRMS (ESI) (*m/z*): calcd for C<sub>18</sub>H<sub>20</sub>NO<sub>3</sub>P [M+H]<sup>+</sup>: 330.1259, found: 330.1261.

**Methyl 3-amino-3-(bis(4-(*tert*-butyl)phenyl)phosphoryl) acrylate) (5).** The title compound was prepared according to the general procedure and purified by column chromatography to give white

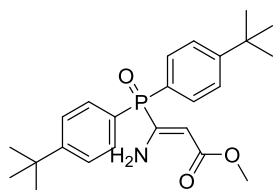

solid (85.4 mg), 69% yield (*Z*:*E* = 1:1) (petroleum ether/ethyl acetate = 1:1). <sup>1</sup>H NMR (400 MHz, CDCl<sub>3</sub>) δ (ppm) 7.65 (dd, *J* = 12.1, 8.4 Hz, 5H), 7.51 – 7.42 (m, 6H), 6.92 (s, 1H), 4.77 (d, *J* = 13.5 Hz, 1H), 3.64 (s, 3H), 1.31 (s, 18H). <sup>13</sup>C NMR (101 MHz, CDCl<sub>3</sub>) δ (ppm) 169.10 (d, *J* = 20.8 Hz), 156.32 (d, *J* = 2.8 Hz), 131.93 (dd, *J* = 10.4, 4.6 Hz), 125.74 (d, *J* = 12.9 Hz), 125.34 (d, *J* = 12.3 Hz), 91.49 (d, *J* = 16.4 Hz), 50.64, 31.08, 31.02; <sup>31</sup>P NMR (162 MHz, CDCl<sub>3</sub>) δ (ppm) 27.86.; HRMS (ESI) (*m/z*): calcd for C<sub>24</sub>H<sub>32</sub>NO<sub>3</sub>P [M+H]<sup>+</sup>: 414.2198, found: 414.2201.

**Methyl 3-amino-3-(bis(4-methoxyphenyl)phosphoryl) Acrylate (6).** The title compound was prepared according to the general procedure and purified by column chromatography to give white

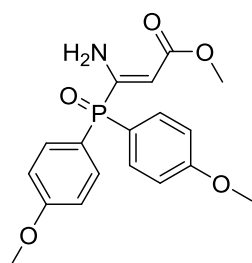

solid (81.2mg), 75% yield (*Z*:*E* = 1:1) (petroleum ether/ethyl acetate = 1:2). <sup>1</sup>H NMR (400 MHz, CDCl<sub>3</sub>) δ (ppm) 7.63 (dd, *J* = 11.9, 8.7 Hz, 4H), 6.97 (dd, *J* = 8.8, 2.3 Hz, 4H), 6.70 (s, 2H), 4.68 (d, *J* = 13.5 Hz, 1H), 3.84 (s, 6H), 3.63 (s, 3H). <sup>13</sup>C NMR (101 MHz, CDCl<sub>3</sub>) δ (ppm) 169.14 (d, *J* = 20.6 Hz), 163.11 (d, *J* = 2.7 Hz), 155.56, 154.58, 133.99 (d, *J* = 11.8 Hz), 121.17, 120.04, 114.32 (d, *J* = 13.7 Hz), 91.52 (d, *J* = 16.6 Hz), 55.39, 50.66; <sup>31</sup>P NMR (162 MHz, CDCl<sub>3</sub>) δ (ppm) 27.89.; HRMS (ESI) (*m/z*): calcd for C<sub>18</sub>H<sub>20</sub>NO<sub>5</sub>P [M+H]<sup>+</sup>: 362.1157, found: 362.1154.

**Methyl-3-amino-3-(bis(4-(trifluoromethyl)phenyl) phosphoryl)acrylate) (7).** The title compound was prepared according to the general procedure and purified by column chromatography to give white solid (90.9 mg), 90% yield (*Z*:*E* = 1:1.1) (petroleum ether/ethyl

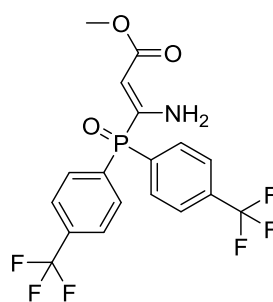

acetate = 1:2). <sup>1</sup>H NMR (400 MHz, CDCl<sub>3</sub>) δ (ppm) 7.84 (dd, *J* = 12.1, 8.0 Hz, 4H), 7.75 (d, *J* = 6.1 Hz, 4H), 6.89 (d, *J* = 34.8 Hz, 2H), 4.65 (d, *J* = 14.2 Hz, 1H), 3.63 (s, 3H). <sup>13</sup>C NMR (101 MHz, CDCl<sub>3</sub>) δ (ppm) 168.71, 152.51, 151.51, 134.93 (dd, *J* = 33.1, 3.1 Hz), 132.58, 132.47, 126.03 – 125.57 (m), 123.21 (d, *J* = 272.4 Hz), 92.83 (d, *J* = 17.1 Hz), 50.90; <sup>31</sup>P NMR (162 MHz, CDCl<sub>3</sub>) δ (ppm) 28.90 (d, *J* = 6.1 Hz); <sup>19</sup>F NMR (376 MHz, CDCl<sub>3</sub>) δ (ppm) -63.46; HRMS (ESI) (*m/z*): calcd for C<sub>16</sub>H<sub>14</sub>F<sub>2</sub>NO<sub>3</sub>P [M+H]<sup>+</sup>: 438.0694, found: 438.0691.

**Methyl 3-amino-3-(bis(3,5-dimethylphenyl)phosphoryl) acrylate (8).** The title compound was prepared according to the general procedure and purified by column chromatography to give white

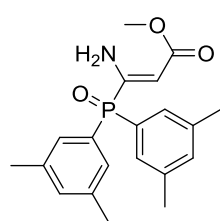

solid (82.4 mg), 77% yield (Z:E = 1:1) (petroleum ether/ethyl acetate = 1:1). <sup>1</sup>H NMR (400 MHz, CDCl<sub>3</sub>) δ (ppm) 7.35 (s, 2H), 7.31 (s, 2H), 7.21 (s, 2H), 6.57 (s, 2H), 4.77 (d, *J* = 13.4 Hz, 1H), 3.67 (s, 3H), 2.35 (s, 12H). <sup>13</sup>C NMR (101 MHz, CDCl<sub>3</sub>) δ (ppm) 169.16 (d, *J* = 20.7 Hz), 154.98, 154.01, 138.56, 138.43, 134.60, 134.57, 134.22, 134.19, 129.53, 129.43, 128.18, 128.07, 91.86 (d, *J* = 16.4 Hz), 50.66, 21.27, 21.19. <sup>31</sup>P NMR (162 MHz, CDCl<sub>3</sub>) δ (ppm) 28.87.; HRMS (ESI) (*m/z*): calcd for C<sub>20</sub>H<sub>24</sub>NO<sub>3</sub>P [M+H]<sup>+</sup>: 358.1572, found: 358.1576.

**(Methyl 3-amino-3-(di([1,1'-biphenyl]-4-yl)phosphoryl) acrylate (9).** The title compound was prepared according to the general procedure and purified by column chromatography to give white

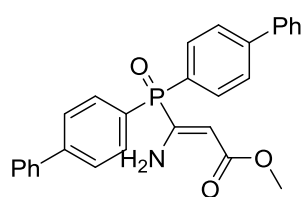

solid (103.2 mg), 76% yield (Z:E = 1:1) (petroleum ether/ethyl acetate = 2:1). <sup>1</sup>H NMR (400 MHz, CDCl<sub>3</sub>) δ (ppm) 7.85 (dd, *J* = 12.1, 8.1 Hz, 4H), 7.72 (dd, *J* = 8.3, 2.8 Hz, 4H), 7.61 (d, *J* = 7.6 Hz, 4H), 7.47 (t, *J* = 7.5 Hz, 4H), 7.40 (t, *J* = 7.1 Hz, 2H), 7.18 (s, 1H), 4.84 (d, *J* = 13.6 Hz, 1H), 3.67 (s, 3H). <sup>13</sup>C NMR (101 MHz, CDCl<sub>3</sub>) δ (ppm) 169.09 (d, *J* = 21.2 Hz), 154.76, 153.78, 145.67 (d, *J* = 2.9 Hz), 139.60, 132.69, 132.58, 129.04, 128.41, 127.53, 127.40, 127.30, 91.98 (d, *J* = 16.7 Hz), 50.77; <sup>31</sup>P NMR (162 MHz, CDCl<sub>3</sub>) δ (ppm) 28.03.; HRMS (ESI) (*m/z*): calcd for C<sub>28</sub>H<sub>24</sub>NO<sub>3</sub>P [M+H]<sup>+</sup>: 454.1572, found: 454.1568.

**(Methyl 3-amino-3-(di(naphthalen-2-yl)phosphoryl)acrylate (10).** The title compound was prepared according to the general procedure and purified by column chromatography to give white

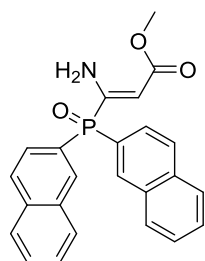

solid (107.1 mg), 89% yield (Z:E = 1:1.1) (petroleum ether/ethyl acetate = 1:1). <sup>1</sup>H NMR (400 MHz, CDCl<sub>3</sub>) δ (ppm) 8.36 (d, *J* = 14.1 Hz, 2H), 7.92 (d, *J* = 8.3 Hz, 2H), 7.86 (d, *J* = 7.9 Hz, 4H), 7.74 (t, *J* = 9.3 Hz, 2H), 7.56 (dt, *J* = 24.4, 7.1 Hz, 4H), 7.07 (s, 2H), 4.86 (d, *J* = 12.9 Hz, 1H), 3.63 (s, 3H). <sup>13</sup>C NMR (101 MHz, CDCl<sub>3</sub>) δ (ppm) 169.10 (d, *J* = 21.0 Hz), 154.62, 153.64, 135.13 (d, *J* = 1.9 Hz), 134.44 (d, *J* = 9.8 Hz), 132.38 (d, *J* = 13.9 Hz), 129.05, 128.89 – 128.64 (m), 127.92, 127.22, 126.96, 126.41 (d, *J* = 10.8 Hz), 125.90, 92.33 (d, *J* = 16.4 Hz), 50.75. <sup>31</sup>P NMR (162 MHz, CDCl<sub>3</sub>) δ (ppm) 28.66.; HRMS (ESI) (*m/z*): calcd for C<sub>24</sub>H<sub>20</sub>NO<sub>3</sub>P [M+H]<sup>+</sup>: 402.1259, found: 402.1260.

**(Ethyl 3-amino-3-(diphenylphosphoryl)acrylate (12).** The title compound was prepared according to the general procedure and purified by column chromatography to give white solid

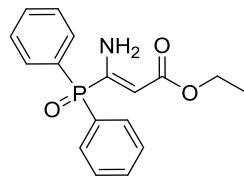

(87.9 mg), 93% yield (Z:E = 1:1) (petroleum ether/ethyl acetate = 1:1). <sup>1</sup>H NMR (400 MHz, CDCl<sub>3</sub>) δ (ppm) 7.73 (t, *J* = 9.0 Hz, 4H), 7.59 (t, *J* = 8.4 Hz, 2H), 7.49 (t, *J* = 5.3 Hz, 4H), 7.09 – 6.53 (m, 1H), 4.72 (d, *J* = 16.4 Hz, 1H), 4.11 (d, *J* = 4.3 Hz, 2H), 1.22 (t, *J* = 7.1 Hz, 3H). <sup>13</sup>C NMR (101 MHz, CDCl<sub>3</sub>) δ (ppm) 168.75 (d, *J* = 21.0 Hz), 154.27, 153.30, 132.83 (d, *J* = 2.8 Hz), 132.12, 132.02, 129.88, 128.83, 128.71, 92.53 (d, *J* = 16.4 Hz), 59.50, 14.32; <sup>31</sup>P NMR (162 MHz, CDCl<sub>3</sub>) δ (ppm) 28.17.; HRMS (ESI) (*m/z*): calcd for C<sub>17</sub>H<sub>18</sub>NO<sub>3</sub>P<sub>3</sub> [M+H]<sup>+</sup>: 316.1103, found: 316.1105.



**(Ethyl 3-amino-3-(diphenylphosphoryl)acrylate) (13).** The title compound was prepared according to the general procedure and purified by column chromatography to give white solid (87.5mg), 85% yield (Z:E = 1:1) (petroleum ether/ethyl acetate = 2:1).

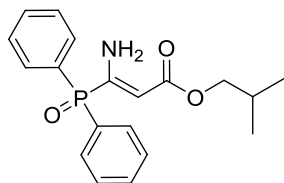

$^1\text{H}$  NMR (400 MHz,  $\text{CDCl}_3$ )  $\delta$  (ppm) 7.74 (dd,  $J = 12.1, 7.6$  Hz, 4H), 7.59 (t,  $J = 7.4$  Hz, 2H), 7.49 (t,  $J = 7.3$  Hz, 4H), 7.25 (s, 2H), 4.78 (d,  $J = 13.3$  Hz, 1H), 3.84 (d,  $J = 6.7$  Hz, 2H), 1.92 – 1.84 (m, 1H), 0.89 (d,  $J = 6.8$  Hz, 6H).  $^{13}\text{C}$  NMR (101 MHz,  $\text{CDCl}_3$ )  $\delta$  (ppm)

168.89 (d,  $J = 20.6$  Hz), 154.25, 153.27, 132.82 (d,  $J = 2.1$  Hz), 132.08 (d,  $J = 10.1$  Hz), 129.97, 128.84, 128.71, 92.61 (d,  $J = 16.1$  Hz), 69.78, 27.75, 19.16.  $^{31}\text{P}$  NMR (162 MHz,  $\text{CDCl}_3$ )  $\delta$  (ppm) 28.04.; HRMS (ESI) (m/z): calcd for  $\text{C}_{19}\text{H}_{22}\text{NO}_3\text{P}$   $[\text{M}+\text{H}]^+$ : 343.1337, found: 343.1340.

**(Butyl 3-amino-3-(diphenylphosphoryl)acrylate) (14).** The title compound was prepared according to the general procedure and purified by column chromatography to give white solid (84.3mg), 82% yield (Z:E = 1:1) (petroleum ether/ethyl acetate = 1:1).

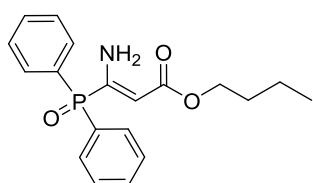

$^1\text{H}$  NMR (400 MHz,  $\text{CDCl}_3$ )  $\delta$  (ppm) 7.73 (t,  $J = 9.0$  Hz, 4H), 7.58 (t,  $J = 8.2$  Hz, 2H), 7.49 (d,  $J = 7.4$  Hz, 4H), 6.72 (d,  $J = 62.3$  Hz, 2H), 4.74 (d,  $J = 15.0$  Hz, 1H), 4.04 (td,  $J = 6.8, 2.1$  Hz, 2H), 1.65 – 1.49 (m, 2H), 1.33 (h,  $J = 7.3$  Hz, 2H), 0.89 (td,  $J = 7.4, 2.2$

Hz, 3H).  $^{13}\text{C}$  NMR (101 MHz,  $\text{CDCl}_3$ )  $\delta$  (ppm) 168.87 (d,  $J = 20.9$  Hz), 154.26, 153.28, 132.79 (d,  $J = 2.3$  Hz), 132.12, 132.02, 128.81, 128.69, 92.53 (d,  $J = 16.3$  Hz), 63.44, 30.79, 19.12, 13.70.  $^{31}\text{P}$  NMR (162 MHz,  $\text{CDCl}_3$ )  $\delta$  (ppm) 28.02.; HRMS (ESI) (m/z): calcd for  $\text{C}_{19}\text{H}_{22}\text{NO}_3\text{P}$   $[\text{M}+\text{H}]^+$ : 344.1416, found: 344.1413.

**(Octyl 3-amino-3-(diphenylphosphoryl)acrylate) (15).** The title compound was prepared according to the general procedure and purified by column chromatography to give white solid (83.7mg), 70% yield (Z:E = 1:1) (petroleum ether/ethyl acetate = 1:1).

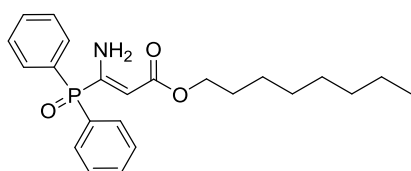

$^1\text{H}$  NMR (400 MHz,  $\text{CDCl}_3$ )  $\delta$  (ppm) 7.74 (dd,  $J = 12.7, 7.5$  Hz, 4H), 7.58 (t,  $J = 7.6$  Hz, 2H), 7.48 (t,  $J = 7.6$  Hz, 4H), 6.76 (s, 1H), 4.74 (d,  $J = 13.9$  Hz, 1H), 4.04 (t,  $J = 6.9$  Hz, 2H), 1.58 (t,  $J = 7.0$  Hz, 2H), 1.24 (s, 12H), 0.90 – 0.81 (m, 3H).  $^{13}\text{C}$  NMR (101 MHz,  $\text{CDCl}_3$ )  $\delta$  (ppm) 168.87 (d,  $J = 21.0$  Hz), 154.23,

153.25, 132.80 (d,  $J = 3.0$  Hz), 132.13, 132.03, 129.96, 128.90, 128.82, 128.69, 92.57 (d,  $J = 16.3$  Hz), 63.79, 31.73, 29.20, 29.12, 28.73, 25.92, 22.59, 14.05.  $^{31}\text{P}$  NMR (162 MHz,  $\text{CDCl}_3$ )  $\delta$  (ppm) 28.03 (d,  $J = 14.8$  Hz).; HRMS (ESI) (m/z): calcd for  $\text{C}_{23}\text{H}_{30}\text{NO}_3\text{P}$   $[\text{M}+\text{H}]^+$ : 400.2042, found: 400.2040.

**(Allyl 3-amino-3-(diphenylphosphoryl)acrylate) (16).** The title compound was prepared according to the general procedure and purified by column chromatography to give white solid (81.4mg), 83% yield (Z:E = 1:1) (petroleum ether/ethyl acetate = 1:1).

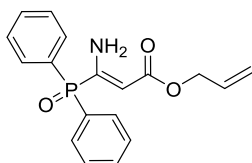

$^1\text{H}$  NMR (400 MHz,  $\text{CDCl}_3$ )  $\delta$  (ppm) 7.77 – 7.70 (m, 4H), 7.61 – 7.56 (m, 2H), 7.49 (td,  $J = 7.6, 3.2$  Hz, 4H), 6.94 (s, 1H), 5.96 – 5.81 (m, 1H), 5.31 – 5.15 (m, 2H), 4.75 (d,  $J = 13.5$  Hz, 1H), 4.56 (d,  $J = 5.8$  Hz, 2H).  $^{13}\text{C}$  NMR (101 MHz,  $\text{CDCl}_3$ )  $\delta$  (ppm) 168.31 (d,  $J = 20.9$

(Hz), 154.78, 153.81, 132.86 (d,  $J = 2.6$  Hz), 132.58, 132.07 (d,  $J = 10.2$  Hz), 129.82, 128.78 (d,  $J = 12.5$  Hz), 118.17, 91.94 (d,  $J = 16.4$  Hz), 64.34.  $^{31}\text{P}$  NMR (162 MHz,  $\text{CDCl}_3$ )  $\delta$  (ppm) 28.08.; HRMS (ESI) ( $m/z$ ): calcd for  $\text{C}_{18}\text{H}_{18}\text{NO}_3\text{P}$  [ $\text{M}+\text{H}$ ] $^+$ : 328.1103, found: 328.1107.

**(Ethyl 3-amino-3-(diphenylphosphoryl)-2-methylacrylate) (17).** The title compound was prepared according to the general procedure and purified by column chromatography to give white

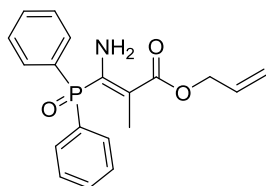

solid (49.3 mg), 52% yield ( $Z:E = 1:1.1$ ) (petroleum ether/ethyl acetate = 1:1).  $^1\text{H}$  NMR (400 MHz,  $\text{CDCl}_3$ )  $\delta$  (ppm) 7.76 (dd,  $J = 12.3, 7.0$  Hz, 4H), 7.62 – 7.55 (m, 2H), 7.53 – 7.46 (m, 4H), 6.91 – 6.60 (m, 2H), 4.16 (q,  $J = 7.1$  Hz, 2H), 1.67 (s, 3H), 1.26 (t,  $J = 7.1$  Hz, 3H).  $^{13}\text{C}$  NMR (101 MHz,  $\text{CDCl}_3$ )  $\delta$  (ppm) 170.34 (d,  $J = 19.2$  Hz), 149.12, 148.14, 132.62 (d,  $J = 2.9$  Hz), 131.91, 131.81, 130.55, 129.51, 128.98, 128.85, 99.19 (d,  $J = 13.5$  Hz), 59.83, 14.64 (d,  $J = 5.6$  Hz), 14.35.  $^{31}\text{P}$  NMR (162 MHz,  $\text{CDCl}_3$ )  $\delta$  (ppm) 29.37.; HRMS (ESI) ( $m/z$ ): calcd for  $\text{C}_{18}\text{H}_{20}\text{NO}_3\text{P}$  [ $\text{M}+\text{H}$ ] $^+$ : 330.1259, found: 330.1260.

**(Ethyl 3-amino-2-(cyanomethyl)-3-(diphenylphosphoryl) acrylate) (18).** The title compound was prepared according to the general procedure and purified by column chromatography to give

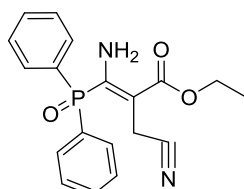

white solid (74.3 mg), 70% yield ( $Z:E = 1:1$ ) (petroleum ether/ethyl acetate = 1:1).  $^1\text{H}$  NMR (400 MHz,  $\text{CDCl}_3$ )  $\delta$  (ppm) 7.77 (dd,  $J = 12.5, 7.1$  Hz, 4H), 7.69 – 7.62 (m, 2H), 7.56 (td,  $J = 7.5, 3.0$  Hz, 4H), 6.70 (s, 1H), 4.22 (q,  $J = 7.1$  Hz, 2H), 3.61 (s, 2H), 1.30 (t,  $J = 7.1$  Hz, 3H).  $^{13}\text{C}$  NMR (101 MHz,  $\text{CDCl}_3$ )  $\delta$  (ppm) 168.46 (d,  $J = 16.8$  Hz), 153.41, 152.49, 133.53 (d,  $J = 2.9$  Hz), 131.93, 131.83, 129.45, 129.33, 128.87, 127.83, 118.00 (d,  $J = 1.6$  Hz), 94.14 (d,  $J = 10.9$  Hz), 60.68, 16.71 (d,  $J = 5.2$  Hz), 14.22.  $^{31}\text{P}$  NMR (162 MHz,  $\text{CDCl}_3$ )  $\delta$  (ppm) 29.92.; HRMS (ESI) ( $m/z$ ): calcd for  $\text{C}_{19}\text{H}_{19}\text{N}_2\text{O}_3\text{P}$  [ $\text{M}+\text{H}$ ] $^+$ : 355.1212, found: 355.1215.

**(Amino-3-(diphenylphosphoryl)-1-phenylprop-2-en-1-one) (19).** The title compound was prepared according to the general procedure and purified by column chromatography to give white

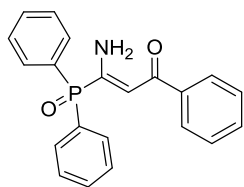

solid (72.8 mg), 70% yield ( $Z:E = 1:1$ ) (petroleum ether/ethyl acetate = 1:1).  $^1\text{H}$  NMR (400 MHz,  $\text{CDCl}_3$ )  $\delta$  (ppm) 9.91 (s, 1H), 7.91 – 7.65 (m, 6H), 7.59 (d,  $J = 6.8$  Hz, 2H), 7.50 (s, 4H), 7.41 (d,  $J = 7.2$  Hz, 1H), 7.35 (d,  $J = 7.7$  Hz, 2H), 6.39 (s, 1H), 5.95 (d,  $J = 12.8$  Hz, 1H).  $^{13}\text{C}$  NMR (101 MHz,  $\text{CDCl}_3$ )  $\delta$  (ppm) 190.50 (d,  $J = 14.6$  Hz), 156.28, 155.34, 139.15 (d,  $J = 3.3$  Hz), 133.00 (d,  $J = 2.9$  Hz), 132.11 (d,  $J = 10.3$  Hz), 131.76, 129.92, 128.91 (d,  $J = 12.5$  Hz), 128.41, 127.36, 97.48 (d,  $J = 13.1$  Hz).  $^{31}\text{P}$  NMR (162 MHz,  $\text{CDCl}_3$ )  $\delta$  (ppm) 27.25; HRMS (ESI) ( $m/z$ ): calcd for  $\text{C}_{21}\text{H}_{18}\text{NO}_2\text{P}$  [ $\text{M}+\text{H}$ ] $^+$ : 348.1152, found: 348.1155.

**(3-Amino-1-(4-chlorophenyl)-3-(diphenylphosphoryl) prop-2-en-1-one) (20).** The title

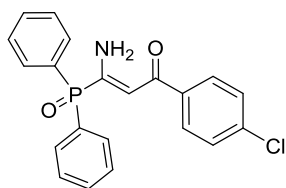

compound was prepared according to the general procedure and purified by column chromatography to give white solid (57.1mg), 50% yield ( $Z:E = 1:1$ ) (petroleum ether/ethyl acetate = 1:1).  $^1\text{H}$  NMR (400 MHz,  $\text{CDCl}_3$ )  $\delta$  (ppm) 7.79 (dd,  $J = 12.8, 8.0$  Hz, 4H), 7.73 (d,  $J = 7.1$  Hz, 2H), 7.66 – 7.58 (m, 2H), 7.54 – 7.50 (m, 3H), 7.44 (t,  $J = 7.3$  Hz, 1H), 7.36 (t,  $J = 7.5$  Hz, 2H), 5.97 (d,  $J = 12.9$  Hz, 1H).  $^{13}\text{C}$  NMR (101 MHz,  $\text{CDCl}_3$ )  $\delta$  (ppm) 190.48 (d,  $J = 14.6$  Hz), 156.29, 155.35, 139.14 (d,  $J = 3.3$  Hz), 133.02 (d,

$J = 2.9$  Hz), 132.10 (d,  $J = 10.3$  Hz), 131.76, 129.86, 128.91 (d,  $J = 12.6$  Hz), 128.41, 127.35, 97.48 (d,  $J = 13.2$  Hz).  $^{31}\text{P}$  NMR (162 MHz,  $\text{CDCl}_3$ )  $\delta$  (ppm) 28.42.; HRMS (ESI) (m/z): calcd for  $\text{C}_{21}\text{H}_{17}\text{ClNO}_2\text{P}$   $[\text{M}+\text{H}]^+$ : 382.0764, found: 382.0762.

**(3-Amino-3-(diphenylphosphoryl)-1-(furan-2-yl)prop-2-en-1-one) (21).** The title compound was prepared according to the general procedure and purified by column chromatography to give

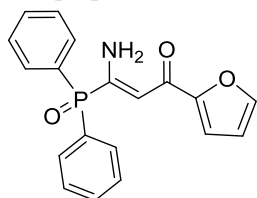

white solid (76.8 mg), 76% yield (Z:E = 1:1) (petroleum ether/ethyl acetate = 1:1).  $^1\text{H}$  NMR (400 MHz,  $\text{DMSO}-d_6$ )  $\delta$  (ppm) 9.56 (s, 1H), 7.81 (s, 1H), 7.78 – 7.73 (m, 3H), 7.68 (d,  $J = 5.7$  Hz, 3H), 7.60 (td,  $J = 7.2$ , 6.7, 2.2 Hz, 4H), 7.53 (td,  $J = 7.2$ , 2.2 Hz, 1H), 7.07 (d,  $J = 3.5$  Hz, 1H), 6.60 (dd,  $J = 3.5$ , 1.7 Hz, 1H), 5.92 (d,  $J = 12.2$  Hz, 1H).  $^{13}\text{C}$  NMR (101

MHz,  $\text{DMSO}-d_6$ )  $\delta$  (ppm) 178.61 (d,  $J = 15.2$  Hz), 158.09, 157.17, 153.55 (d,  $J = 4.0$  Hz), 146.65, 133.38 (d,  $J = 2.7$  Hz), 132.89 (d,  $J = 2.9$  Hz), 132.15 (d,  $J = 10.1$  Hz), 130.76, 130.63 (d,  $J = 3.1$  Hz), 129.46 (dd,  $J = 12.3$ , 3.9 Hz), 115.15, 112.92, 95.96 (d,  $J = 13.4$  Hz).  $^{31}\text{P}$  NMR (162 MHz,  $\text{DMSO}-d_6$ )  $\delta$  (ppm) 27.98.; HRMS (ESI) (m/z): calcd for  $\text{C}_{19}\text{H}_{16}\text{NO}_3\text{P}$   $[\text{M}+\text{H}]^+$ : 338.0946, found: 338.0948.

**(1-Amino-1-(diphenylphosphoryl)-4,4-dimethylpent-1-en-3-one) (22).** The title compound was prepared according to the general procedure and purified by column chromatography to give white

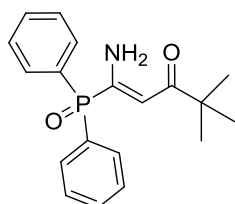

solid (80.4 mg), 82% yield (Z:E = 1:1) (petroleum ether/ethyl acetate = 1:1).  $^1\text{H}$  NMR (400 MHz,  $\text{CDCl}_3$ )  $\delta$  (ppm) 9.32 (s, 1H), 7.75 – 7.67 (m, 4H), 7.58 (td,  $J = 7.3$ , 1.5 Hz, 2H), 7.47 (td,  $J = 7.6$ , 3.2 Hz, 4H), 6.02 (s, 1H), 5.44 (d,  $J = 13.5$  Hz, 1H), 1.02 (s, 9H).  $^{13}\text{C}$  NMR (101 MHz,  $\text{CDCl}_3$ )  $\delta$  (ppm) 206.54 (d,  $J = 13.1$  Hz), 154.12 (d,  $J = 95.6$  Hz), 132.81 (d,  $J = 2.9$  Hz), 132.05, 131.95, 130.11, 129.06, 128.80, 128.68, 97.20 (d,  $J = 12.7$

Hz), 42.63, 27.05.  $^{31}\text{P}$  NMR (162 MHz,  $\text{CDCl}_3$ )  $\delta$  (ppm) 27.36.; HRMS (ESI) (m/z): calcd for  $\text{C}_{19}\text{H}_{22}\text{NO}_2\text{P}$   $[\text{M}+\text{H}]^+$ : 328.1466, found: 328.1461.

**(3-Amino-3-(diphenylphosphoryl)-N-methylacrylamide) (23).** The title compound was prepared according to the general procedure and purified by column chromatography to give white

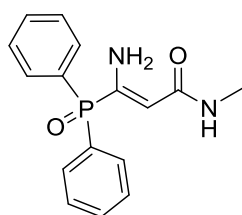

solid (67.5 mg), 75% yield (Z:E = 1:1) (petroleum ether/ethyl acetate = 1:20).  $^1\text{H}$  NMR (400 MHz,  $\text{CDCl}_3$ )  $\delta$  (ppm) 8.23 (s, 2H), 7.94 (d,  $J = 8.0$  Hz, 4H), 7.82 (t,  $J = 8.0$  Hz, 4H), 7.48 (t,  $J = 8.0$  Hz, 2H), 7.30-7.35 (m, 6H), 7.31 (d,  $J = 8.0$  Hz, 6H), 2.39 (t,  $J = 12.0$  Hz, 2H).  $^{13}\text{C}$  NMR (101 MHz,  $\text{CDCl}_3$ )  $\delta$  (ppm) 148.9, 144.0, 133.2 (t,  $J = 4.0$  Hz), 132.7 (t,  $J = 4.0$  Hz), 132.1, 132.0, 131.0, 130.0, 129.5, 128.5, 128.2 (t,  $J = 6.1$  Hz), 127.9

(t,  $J = 4.0$  Hz), 66.2 (t,  $J = 60.1$  Hz).  $^{31}\text{P}$  NMR (162 MHz,  $\text{CDCl}_3$ )  $\delta$  (ppm) 34.09; HRMS (ESI) (m/z): calcd for  $\text{C}_{16}\text{H}_{18}\text{N}_2\text{O}_2\text{P}$   $[\text{M}+\text{H}]^+$ : 301.1106, found: 301.1108.

**(3-Amino-3-(diphenylphosphoryl)-N,N-dimethylacrylamide) (24).** The title compound was prepared according to the general procedure and purified by column chromatography to give white

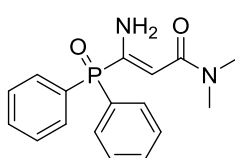

solid (74.2 mg), 79 % yield (Z:E = 1:1) (petroleum ether/ethyl acetate = 1:1).  $^1\text{H}$  NMR (400 MHz,  $\text{CDCl}_3$ )  $\delta$  (ppm) 7.70 (t,  $J = 11.1$  Hz, 4H), 7.53 (t,  $J = 7.7$  Hz, 2H), 7.43 (t,  $J = 7.7$  Hz, 4H), 6.57 (s, 2H), 5.18 (d,  $J = 14.6$  Hz, 1H), 2.83 (d,  $J = 31.8$  Hz, 6H).  $^{13}\text{C}$  NMR (101 MHz,  $\text{CDCl}_3$ )  $\delta$  (ppm)

168.94, 151.06 (d,  $J = 101.0$  Hz), 132.61, 132.06, 131.97, 130.42, 129.38, 128.75, 128.63, 92.86 (d,  $J = 15.9$  Hz), 37.25, 34.92.  $^{31}\text{P}$  NMR (162 MHz,  $\text{CDCl}_3$ )  $\delta$  (ppm) 27.94. HRMS (ESI) (m/z): calcd for  $\text{C}_{17}\text{H}_{19}\text{N}_2\text{O}_2\text{P}$   $[\text{M}+\text{H}]^+$ : 315.1262, found: 315.1267.

**(3-Amino-3-(diphenylphosphoryl)-1-(piperidin-1-yl)prop-2-en-1-one ) (25).** The title compound was prepared according to the general procedure and purified by column

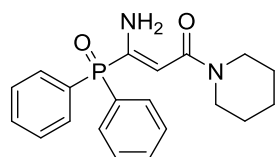

chromatography to give white solid (80.7 mg), 76% yield ( $\text{Z}:\text{E} = 1:1$ ) (petroleum ether/ethyl acetate = 1:1).  $^1\text{H}$  NMR (400 MHz,  $\text{CDCl}_3$ )  $\delta$  (ppm) 7.70 (t,  $J = 9.9$  Hz, 4H), 7.51 (d,  $J = 7.5$  Hz, 2H), 7.45 – 7.41 (m, 4H), 6.90 (s, 2H), 5.30 (d,  $J = 14.2$  Hz, 1H), 3.49 (d,  $J = 5.7$  Hz, 2H), 3.44 (s, 3H), 3.30 (t,  $J = 5.2$  Hz, 2H), 1.43 (s, 3H)  $^{13}\text{C}$  NMR (101 MHz,

$\text{CDCl}_3$ )  $\delta$  (ppm) 159.81, 151.06 (d,  $J = 101.8$  Hz), 132.62, 131.97 (d,  $J = 9.7$  Hz), 130.60 (d,  $J = 11.4$  Hz), 128.91, 128.63, 114.23, 93.00, 47.45, 25.59 (d,  $J = 84.4$  Hz), 24.90, 24.26 (d,  $J = 47.7$  Hz).  $^{31}\text{P}$  NMR (162 MHz,  $\text{CDCl}_3$ )  $\delta$  (ppm) 29.72. HRMS (ESI) (m/z): calcd for  $\text{C}_{20}\text{H}_{23}\text{N}_2\text{O}_2\text{P}$   $[\text{M}+\text{H}]^+$ : 355.1575, found: 355.1577.

**(3-Amino-3-(diphenylphosphoryl)-N-phenylacrylamide) (26).** The title compound was prepared according to the general procedure and purified by column chromatography to give white

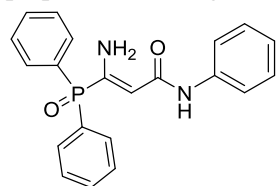

solid (73.8 mg), 68% yield ( $\text{Z}:\text{E} = 1:1$ ) (petroleum ether/ethyl acetate = 1:1).  $^1\text{H}$  NMR (400 MHz,  $\text{DMSO}-d_6$ )  $\delta$  (ppm) 9.81 (s, 1H), 7.78 – 7.67 (m, 6H), 7.61 (td,  $J = 7.3, 3.0$  Hz, 6H), 7.26 (t,  $J = 7.9$  Hz, 2H), 6.97 (d,  $J = 7.3$  Hz, 1H), 5.32 (d,  $J = 13.7$  Hz, 1H).  $^{13}\text{C}$  NMR (101 MHz,

$\text{DMSO}-d_6$ )  $\delta$  (ppm) 167.67 (d,  $J = 18.5$  Hz), 152.77, 151.78, 140.13, 133.10 (d,  $J = 2.9$  Hz), 132.92 (d,  $J = 2.8$  Hz), 132.14 (d,  $J = 9.9$  Hz), 131.30, 130.78, 130.67, 130.28, 129.43, 129.31, 129.11, 122.96, 119.19, 95.87 (d,  $J = 14.3$  Hz).  $^{31}\text{P}$  NMR (162 MHz,  $\text{DMSO}-d_6$ )  $\delta$  (ppm) 23.79.; HRMS (ESI) (m/z): calcd for  $\text{C}_{19}\text{H}_{12}\text{N}_2\text{O}_2\text{P}$   $[\text{M}+\text{H}]^+$ : 363.1262, found: 363.1264.

**(3-Amino-3-(diphenylphosphoryl)acrylamide) (27).** The title compound was prepared according to the general procedure and purified by column chromatography to give white solid (60.0 mg),

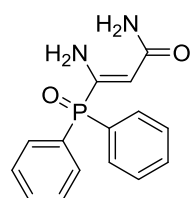

70% yield ( $\text{Z}:\text{E} = 1:1$ ) (petroleum ether/ethyl acetate = 1:1).  $^1\text{H}$  NMR (400 MHz,  $\text{DMSO}-d_6$ )  $\delta$  (ppm) 7.72 (dd,  $J = 12.4, 7.3$  Hz, 4H), 7.57 (d,  $J = 7.7$  Hz, 2H), 7.48 (td,  $J = 7.7, 2.9$  Hz, 4H), 6.76 (d,  $J = 17.6$  Hz, 2H), 5.29 (s, 2H), 4.88 (d,  $J = 13.8$  Hz, 1H).  $^{13}\text{C}$  NMR (101 MHz,  $\text{DMSO}-d_6$ )  $\delta$  (ppm) 171.11 (d,  $J = 18.1$  Hz), 151.47, 150.47, 133.06 (d,  $J = 2.7$  Hz), 132.05, 131.95, 131.15, 130.13, 129.30 (d,  $J = 11.9$  Hz), 95.78 (d,  $J = 14.3$  Hz).  $^{31}\text{P}$  NMR (162 MHz,

$\text{DMSO}-d_6$ )  $\delta$  (ppm) 30.64.; HRMS (ESI) (m/z): calcd for  $\text{C}_{15}\text{H}_{15}\text{N}_2\text{O}_2\text{P}$   $[\text{M}+\text{H}]^+$ : 287.0949, found: 287.0951.

**(2-(Amino(diphenylphosphoryl)methylene)-3-oxobutanenitrile) (28).** The title compound was prepared according to the general procedure and purified by column chromatography to give white solid (49.2 mg), 53% yield ( $\text{Z}:\text{E} = 1:1$ ) (petroleum ether/ethyl acetate = 1:10).  $^1\text{H}$  NMR (400 MHz,  $\text{CDCl}_3$ )  $\delta$  (ppm) 11.32 (d,  $J = 29.4$  Hz, 1H), 7.91 (dd,  $J = 12.4, 7.8$  Hz, 4H), 7.70 (t,  $J = 7.5$

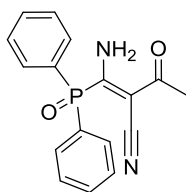

Hz, 2H), 7.59 (td,  $J = 7.8, 7.1, 2.9$  Hz, 4H), 2.33 (s, 3H).  $^{13}\text{C}$  NMR (101 MHz,  $\text{CDCl}_3$ )  $\delta$  (ppm) 164.43, 133.89 (d,  $J = 2.8$  Hz), 132.81, 132.70, 129.18, 129.04, 127.06, 125.98, 29.68, 28.77 (d,  $J = 2.8$  Hz).  $^{31}\text{P}$  NMR (162 MHz,  $\text{CDCl}_3$ )  $\delta$  (ppm) 24.60.; HRMS (ESI) ( $m/z$ ): calcd for  $\text{C}_{17}\text{H}_{15}\text{N}_2\text{O}_2\text{P}$   $[\text{M}+\text{H}]^+$ : 311.0949, found: 311.0947.

**(1-Amino-2-(phenylsulfonyl)vinyl)diphenylphosphine oxide (29).** The title compound was prepared according to the general procedure and purified by column chromatography to give white solid (73.5 mg), 64% yield ( $Z:E = 1:1$ ) (petroleum ether/ethyl acetate = 2:1).

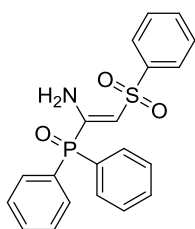

$^1\text{H}$  NMR (400 MHz,  $\text{CDCl}_3$ )  $\delta$  (ppm) 7.82 (d,  $J = 8.1$  Hz, 2H), 7.61 (d,  $J = 8.1$  Hz, 3H), 7.58 – 7.54 (m, 4H), 7.47 (t,  $J = 7.7$  Hz, 2H), 7.42 (td,  $J = 8.0, 3.2$  Hz, 4H), 6.50 (s, 2H), 4.95 (d,  $J = 13.8$  Hz, 1H).  $^{13}\text{C}$  NMR (101 MHz,  $\text{CDCl}_3$ )  $\delta$  (ppm) 150.14 (d,  $J = 91.2$  Hz), 143.16, 133.18 (d,  $J = 2.8$  Hz), 132.96, 132.02, 131.92, 129.11, 128.98, 128.85, 127.91, 126.03, 100.03, 99.88.  $^{31}\text{P}$  NMR (162 MHz,  $\text{CDCl}_3$ )  $\delta$  (ppm) 28.71.; HRMS (ESI) ( $m/z$ ): calcd for  $\text{C}_{20}\text{H}_{18}\text{NO}_3\text{PS}$   $[\text{M}+\text{H}]^+$ : 384.0823, found: 384.0825.

**(1-Amino-2-(methylsulfonyl)vinyl)diphenylphosphine oxide (30).** The title compound was prepared according to the general procedure and purified by column chromatography to give white solid (74.1 mg), 77% yield ( $Z:E = 1:1$ ) (petroleum ether/ethyl acetate = 2:1).

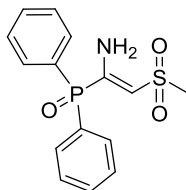

$^1\text{H}$  NMR (400 MHz,  $\text{CDCl}_3$ )  $\delta$  (ppm) 7.71 (dd,  $J = 12.3, 7.7$  Hz, 4H), 7.60 (d,  $J = 7.7$  Hz, 2H), 7.50 (td,  $J = 7.7, 3.0$  Hz, 4H), 6.49 – 6.27 (m, 2H), 4.94 (d,  $J = 13.8$  Hz, 1H), 2.90 (s, 3H).  $^{13}\text{C}$  NMR (101 MHz,  $\text{CDCl}_3$ )  $\delta$  (ppm) 151.31, 150.40, 133.31, 133.28, 132.05, 131.94, 129.08, 128.96, 99.00, 98.84, 44.25, 44.24.  $^{31}\text{P}$  NMR (162 MHz,  $\text{CDCl}_3$ )  $\delta$  (ppm) 28.63; HRMS (ESI) ( $m/z$ ): calcd for  $\text{C}_{15}\text{H}_{16}\text{NO}_3\text{PS}$   $[\text{M}+\text{H}]^+$ : 322.0667, found: 322.0664.

**(3-Amino-3-(diphenylphosphoryl)acrylonitrile (31).** The title compound was prepared according to the general procedure and purified by column chromatography to give white solid (48.2 mg), 60% yield ( $Z:E = 1:1$ ) (petroleum ether/ethyl acetate = 2:1).

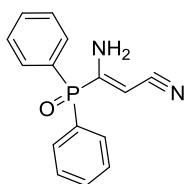

$^1\text{H}$  NMR (400 MHz,  $\text{CDCl}_3$ )  $\delta$  (ppm) 7.71 (t,  $J = 10.0$  Hz, 4H), 7.63 (d,  $J = 7.4$  Hz, 2H), 7.53 (d,  $J = 7.7$  Hz, 4H), 5.49 (d,  $J = 13.0$  Hz, 2H), 4.13 (d,  $J = 11.2$  Hz, 1H).  $^{13}\text{C}$  NMR (101 MHz,  $\text{CDCl}_3$ )  $\delta$  (ppm) 133.30 (d,  $J = 3.0$  Hz), 132.02, 131.91, 129.08, 128.95, 73.43, 73.21.  $^{31}\text{P}$  NMR (162 MHz,  $\text{CDCl}_3$ )  $\delta$  (ppm) 27.93.; HRMS (ESI) ( $m/z$ ): calcd for  $\text{C}_{15}\text{H}_{13}\text{N}_2\text{OP}$   $[\text{M}+\text{H}]^+$ : 269.0844, found: 269.0848.

**(Diethyl (2-amino-2-(diphenylphosphoryl)vinyl)phosphonate (32).** The title compound was prepared according to the general procedure and purified by column chromatography to give white solid (77.3 mg), 68% yield ( $Z:E = 1:1$ ) (petroleum ether/ethyl acetate = 2:1).

$^1\text{H}$  NMR (400 MHz,  $\text{CDCl}_3$ )  $\delta$  (ppm) 7.71 (dd,  $J = 12.3, 7.6$  Hz, 4H), 7.55 (t,  $J = 7.5$  Hz, 2H), 7.46 (d,  $J = 7.6$  Hz, 4H), 6.16 (d,  $J = 17.6$  Hz, 2H), 4.20 (dd,  $J = 17.6, 12.5$  Hz, 1H), 3.95 (h,  $J = 9.4$  Hz, 4H), 1.21 (t,  $J = 7.1$  Hz, 6H).  $^{13}\text{C}$  NMR (101 MHz,  $\text{CDCl}_3$ )  $\delta$  (ppm) 155.82 (d,  $J = 95.9$  Hz), 132.77 (d,  $J = 2.8$  Hz), 131.95 (d,  $J = 10.1$  Hz), 129.83, 128.72 (d,  $J = 12.5$  Hz), 86.03 (d,  $J = 13.4$  Hz), 84.22 (d,  $J = 13.5$  Hz), 61.44 (d,  $J = 5.0$  Hz), 29.59, 16.22 (d,  $J = 6.4$  Hz);  $^{31}\text{P}$  NMR (162 MHz)  $\delta$

(ppm) 28.74 (d,  $J = 85.0$  Hz), 21.65 (d,  $J = 69.5$  Hz). HRMS (ESI) ( $m/z$ ): calcd for  $C_{18}H_{23}NO_4P_2$   $[M+H]^+$ : 380.1181, found: 380.1185.

**(3-(Amino(diphenylphosphoryl)methylene)isochroman-1-one) (33)**. The title compound was prepared according to the general procedure and purified by column chromatography to give white

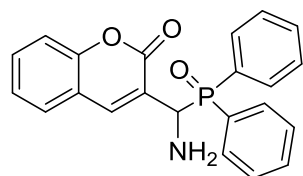

solid (54.0 mg), 48% yield ( $Z:E = 1:1$ ) (petroleum ether/ethyl acetate = 2:1).  $^1H$  NMR (400 MHz,  $CDCl_3$ )  $\delta$ (ppm) 9.91 (s, 1H), 7.79 (dd,  $J = 12.4, 7.7$  Hz, 4H), 7.72 (d,  $J = 7.6$  Hz, 2H), 7.64 (s, 2H), 7.56–7.49 (m, 4H), 7.44 (d,  $J = 14.6$  Hz, 1H), 7.36 (t,  $J = 7.6$  Hz, 2H), 5.97 (d,  $J = 12.9$  Hz, 1H).  $^{13}C$  NMR (101 MHz,  $CDCl_3$ )  $\delta$  (ppm) 190.52 (d,  $J = 14.4$  Hz), 156.19, 155.26, 139.13 (d,  $J = 3.5$  Hz),

133.02 (d,  $J = 2.9$  Hz), 132.12 (d,  $J = 10.3$  Hz), 131.77, 129.84, 128.98, 128.85, 128.40, 127.36, 97.52 (d,  $J = 13.1$  Hz).  $^{31}P$  NMR (162 MHz,  $CDCl_3$ )  $\delta$  (ppm) 27.48.; HRMS (ESI) ( $m/z$ ): calcd for  $C_{22}H_{18}NO_3P$   $[M+H]^+$ : 376.3638, found: 376.3635.

## 7. X-Ray diffraction analysis of 3a

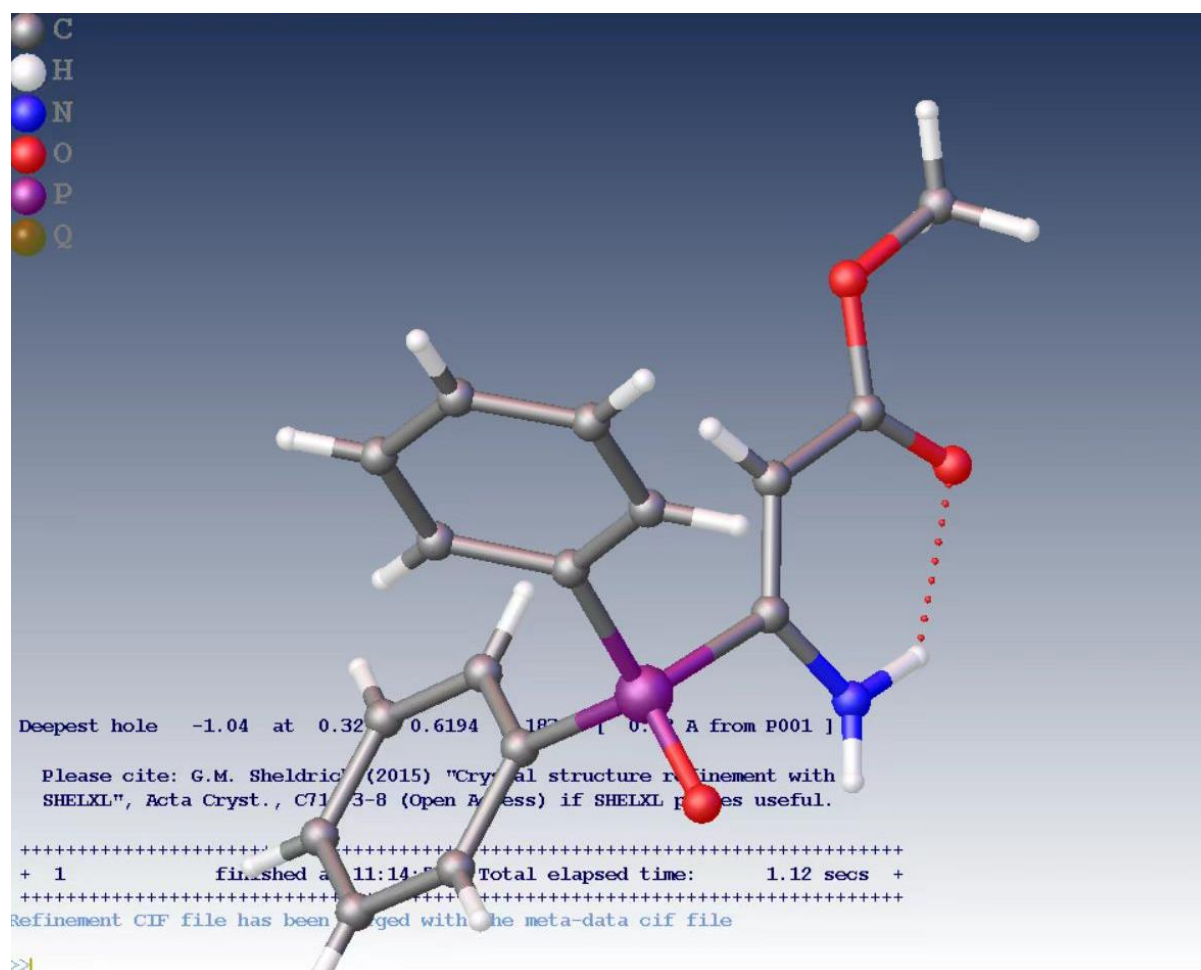

**Figure S1. Structure of 3a**

|                                             |                                                               |
|---------------------------------------------|---------------------------------------------------------------|
| Formula                                     | C <sub>16</sub> H <sub>16</sub> O <sub>3</sub> NP             |
| CCDC numbers                                | 2286021                                                       |
| Formula Mass                                | 301.09                                                        |
| Crystal system                              | monoclinic                                                    |
| Space group                                 | C 2/c                                                         |
| a (Å)                                       | 22.033(2)                                                     |
| b (Å)                                       | 13.718(2)                                                     |
| c (Å)                                       | 10.1323(12)                                                   |
| α (°)                                       | 90                                                            |
| β (°)                                       | 97.804(3)                                                     |
| γ (°)                                       | 90                                                            |
| V (Å) <sup>3</sup>                          | 3034.0(7)                                                     |
| Z                                           | 40                                                            |
| Pcalc(g/cm <sup>3</sup> )                   | 1.620                                                         |
| F (000)                                     | 1480.0                                                        |
| Index ranges                                | -28 ≤ h ≤ 25, -11 ≤ k ≤ 17, -13 ≤ l ≤ 11                      |
| μ (Mo Kα, mm <sup>-1</sup> )                | 0.625                                                         |
| Reflections collected                       | 9104                                                          |
| Independent reflections                     | 3494 [R <sub>int</sub> = 0.0255, R <sub>sigma</sub> = 0.0330] |
| Data/restraints/parameters                  | 3494/0/94                                                     |
| Final R indexes [I ≥ 2σ (I)]                | R <sub>1</sub> = 0.0881, wR <sub>2</sub> = 0.2345             |
| Final R indexes [all data]                  | R <sub>1</sub> = 0.1135, wR <sub>2</sub> = 0.2628             |
| Goodness-of-fit on F <sup>2</sup>           | 1.037                                                         |
| Largest diff. peak/hole / e Å <sup>-3</sup> | 0.70/-1.04                                                    |

8. Copies of product  $^1\text{H}$  NMR,  $^{13}\text{C}$  NMR,  $^{31}\text{P}$  NMR

**Methyl -3-amino-3-(diphenylphosphoryl)acrylate (3)**

$^1\text{H}$  NMR (400 MHz,  $\text{CDCl}_3$ )

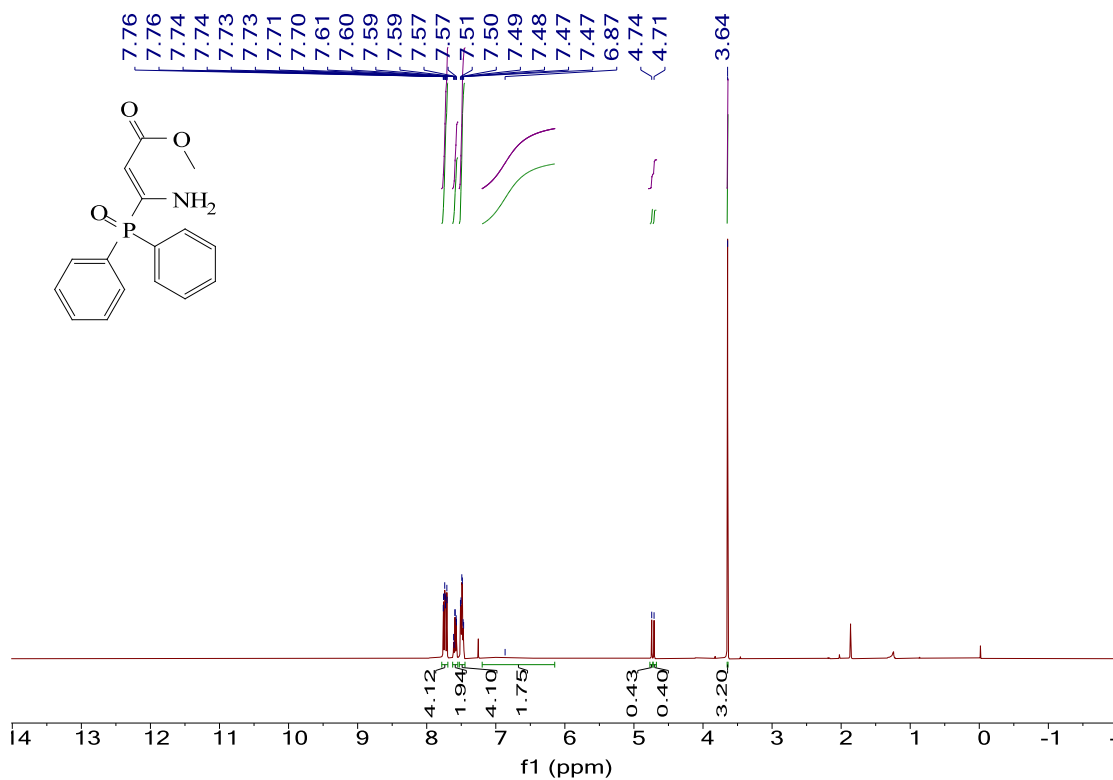

$^{13}\text{C}$  NMR (101 MHz,  $\text{CDCl}_3$ )

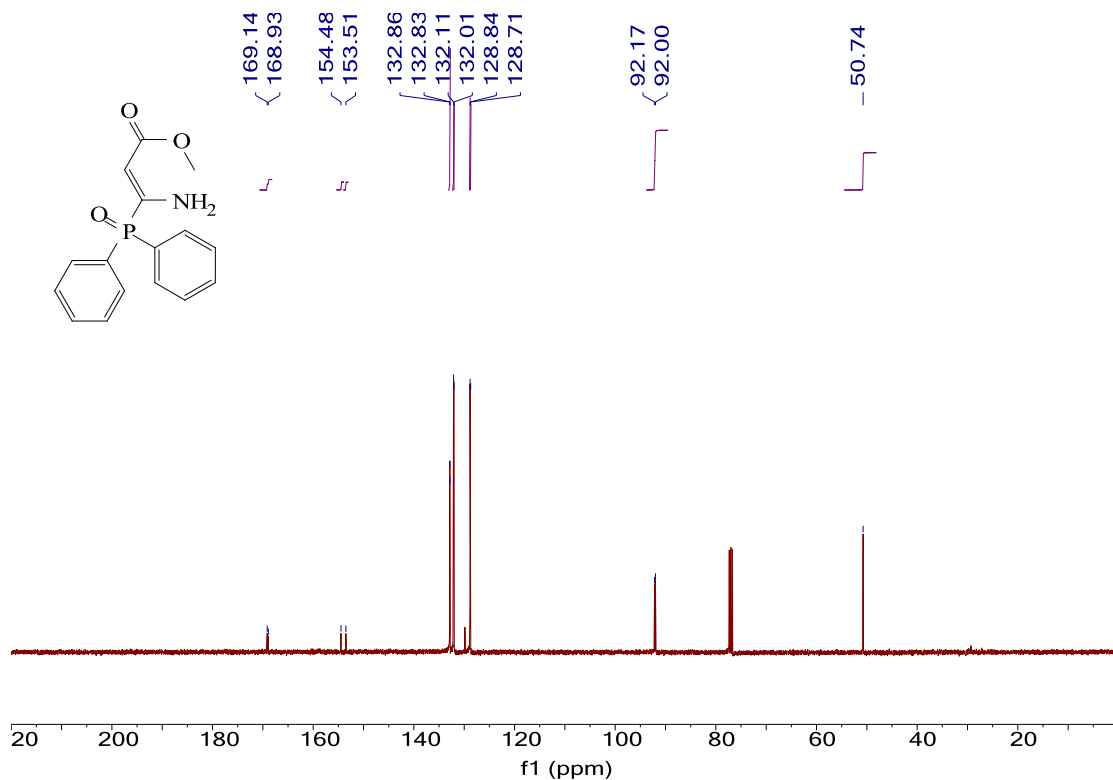



$^{31}\text{P}$  NMR (162 MHz,  $\text{CDCl}_3$ )

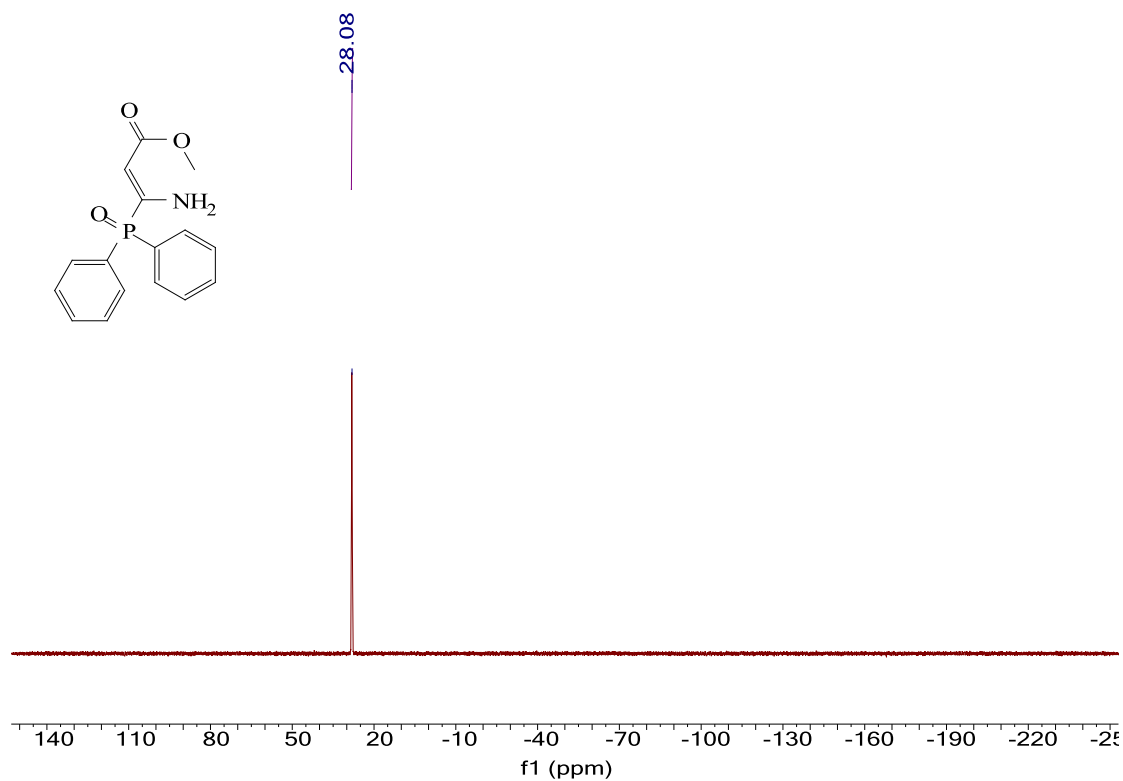

### Methyl 3-amino-3-(di-p-tolylphosphoryl)acrylate (4)

$^1\text{H}$  NMR (400 MHz,  $\text{CDCl}_3$ )

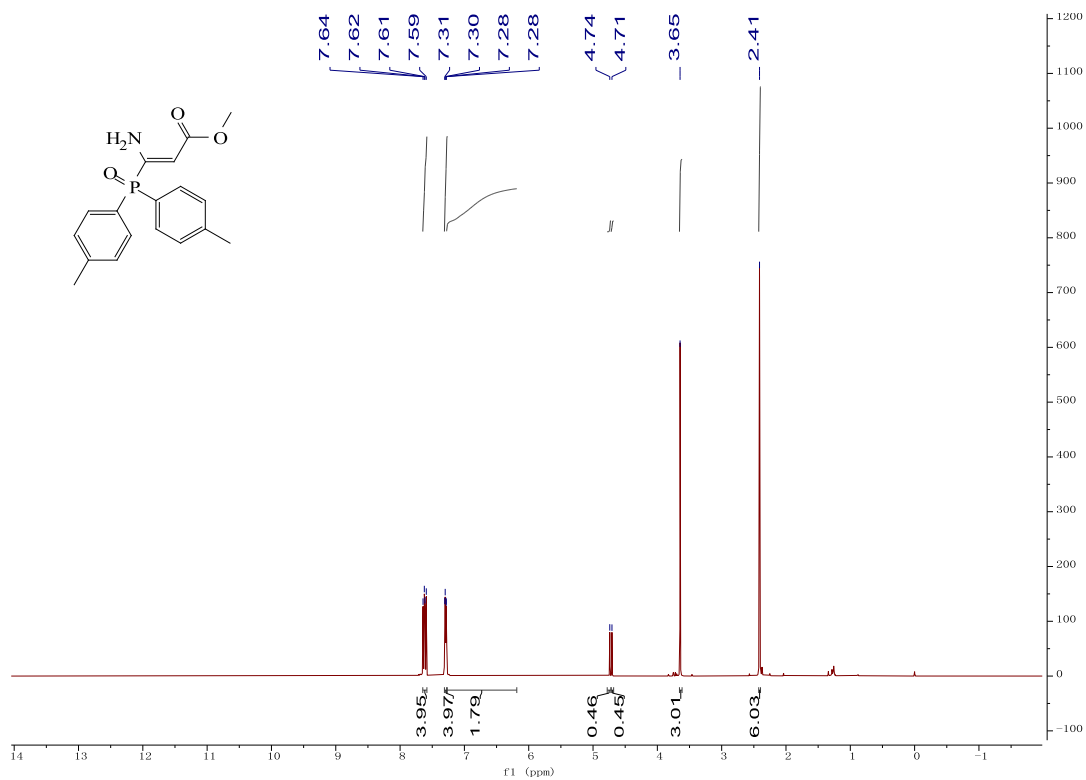

$^1\text{H}$  NMR (400 MHz,  $\text{DMSO-}d_6$ )

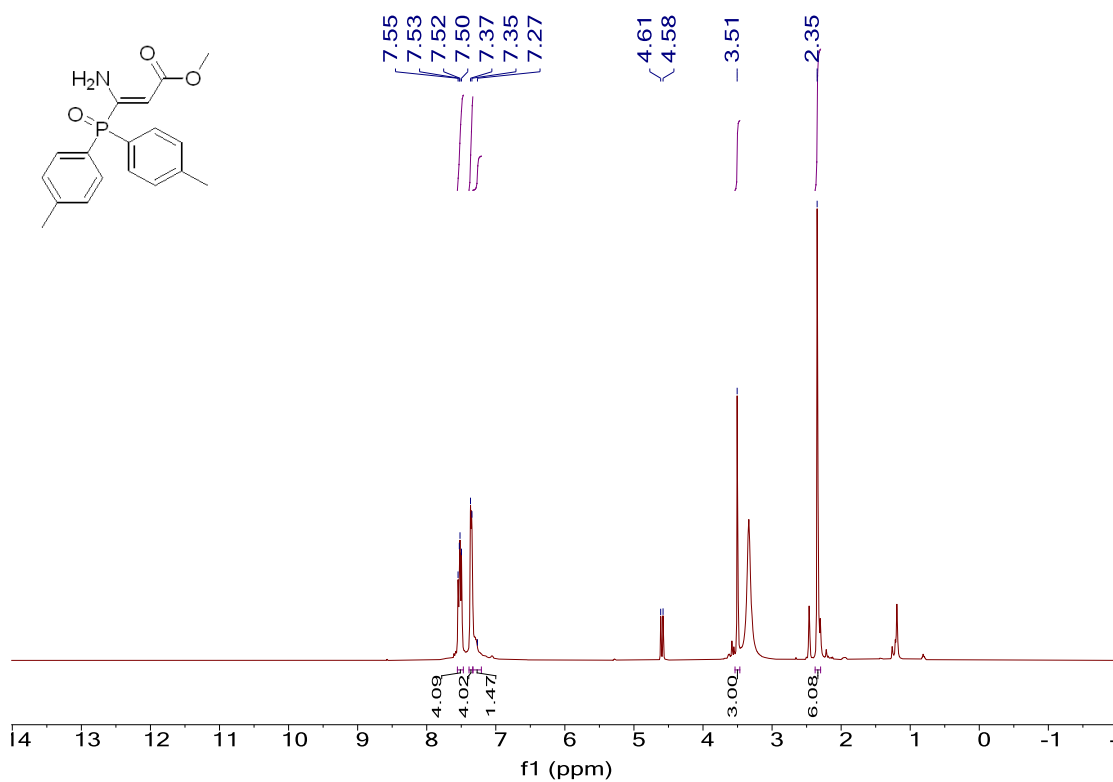

$^{13}\text{C}$  NMR (101 MHz,  $\text{CDCl}_3$ )

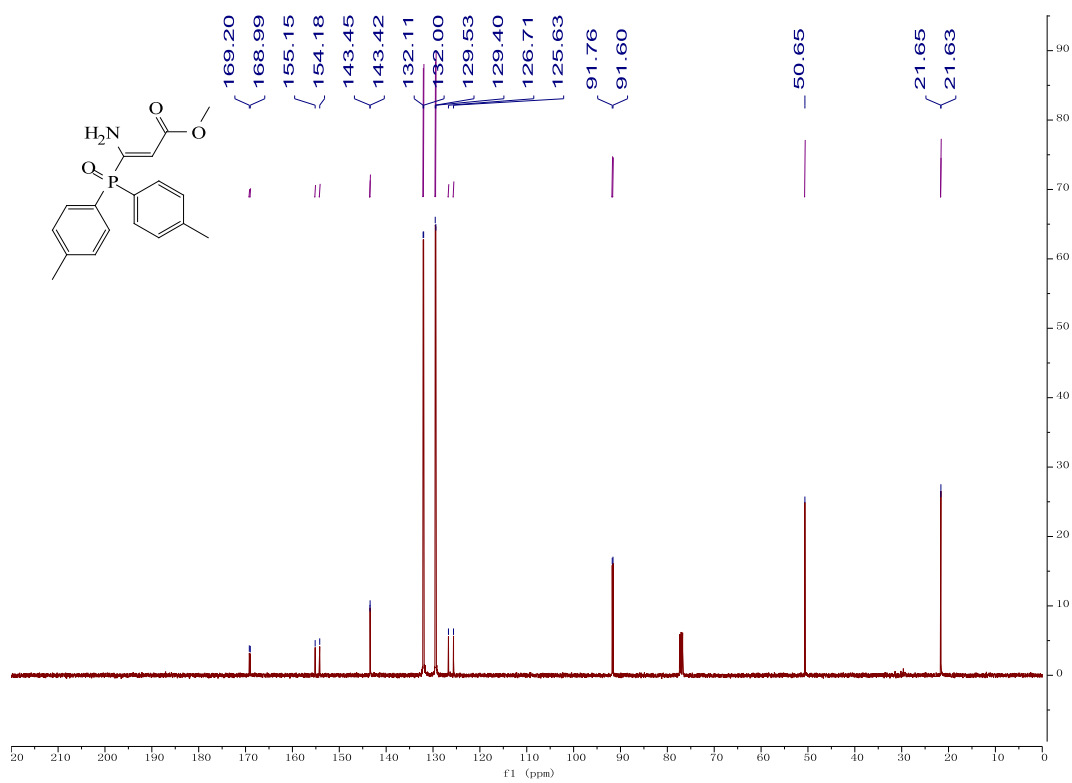

$^{31}\text{P}$  NMR (162 MHz,  $\text{CDCl}_3$ )

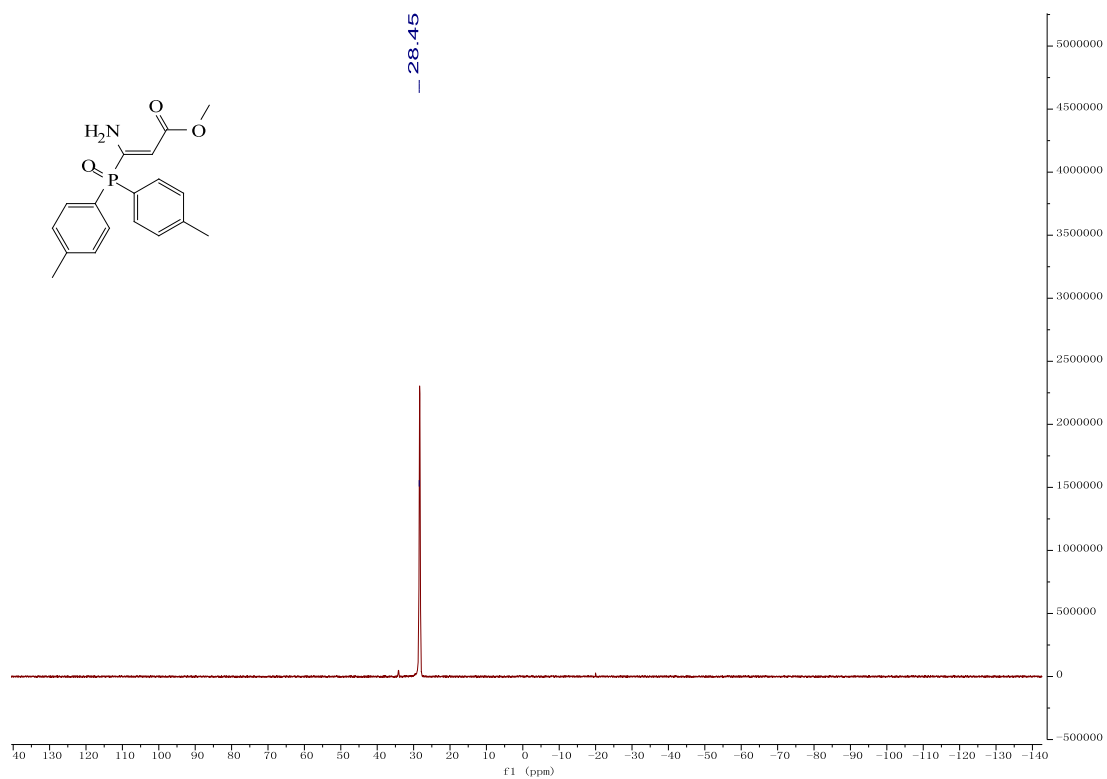

**Methyl 3-amino-3-(bis(4-(tert-butyl)phenyl)phosphoryl)acrylate (5)**

$^1\text{H}$  NMR (400 MHz,  $\text{CDCl}_3$ )

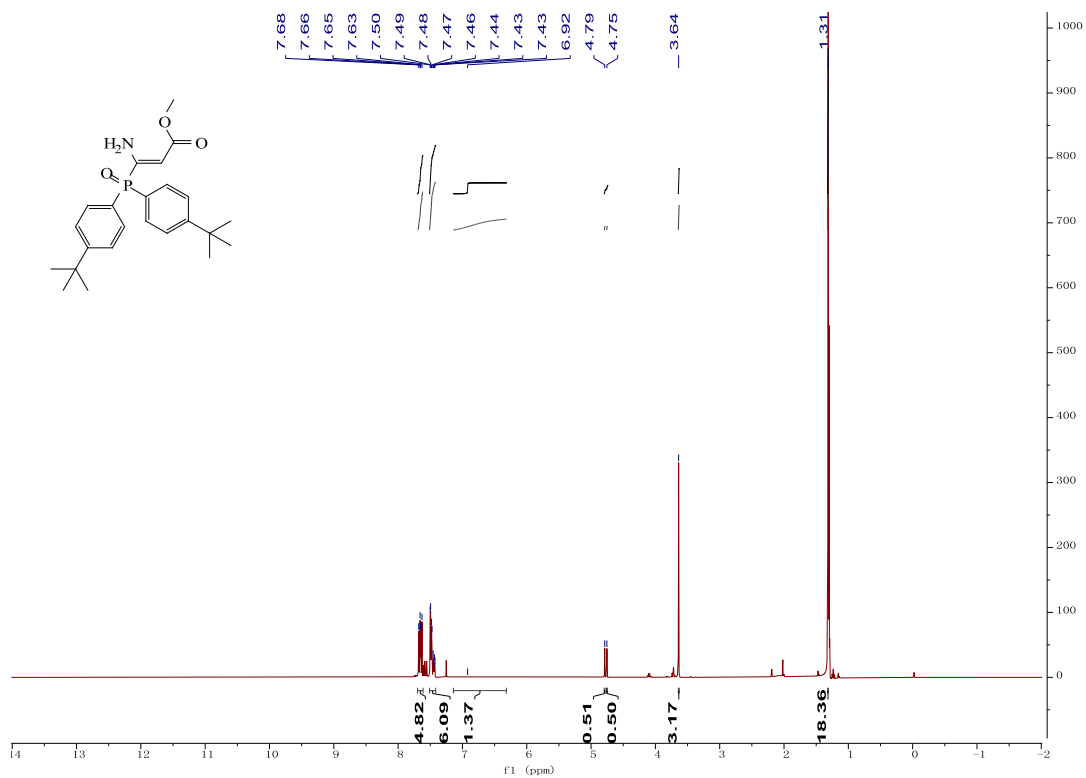

<sup>1</sup>H NMR (400 MHz, DMSO-*d*<sub>6</sub>)

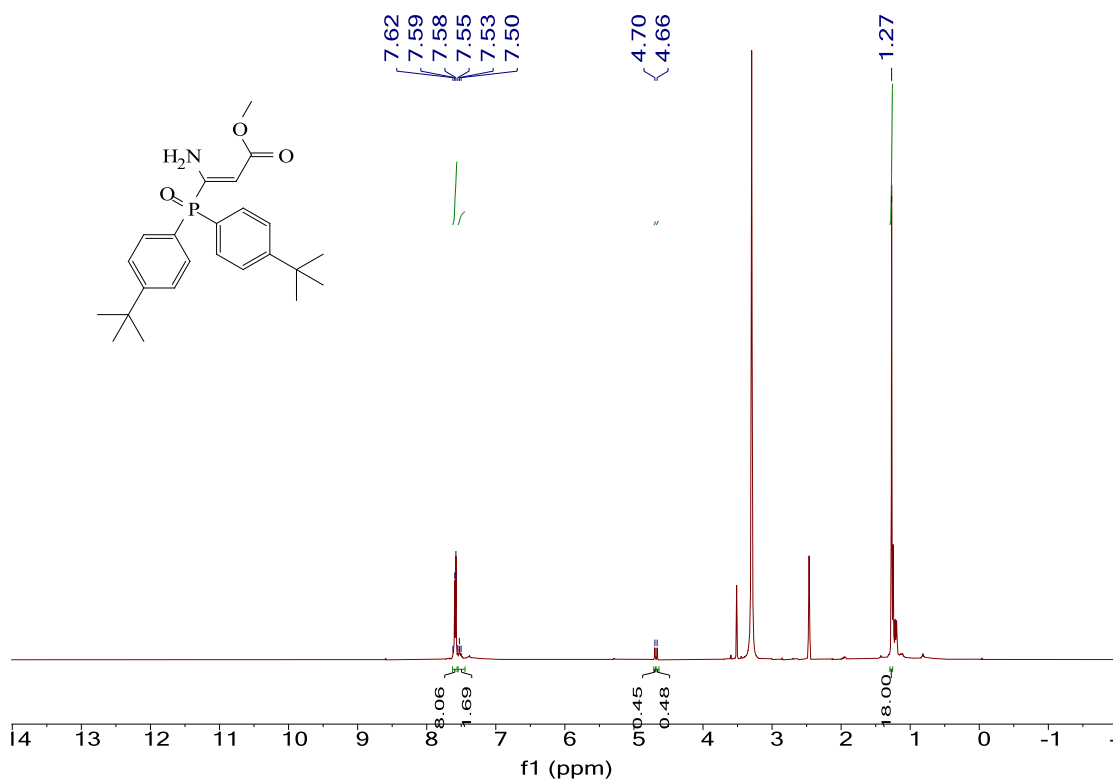

<sup>13</sup>C NMR (101 MHz, CDCl<sub>3</sub>)

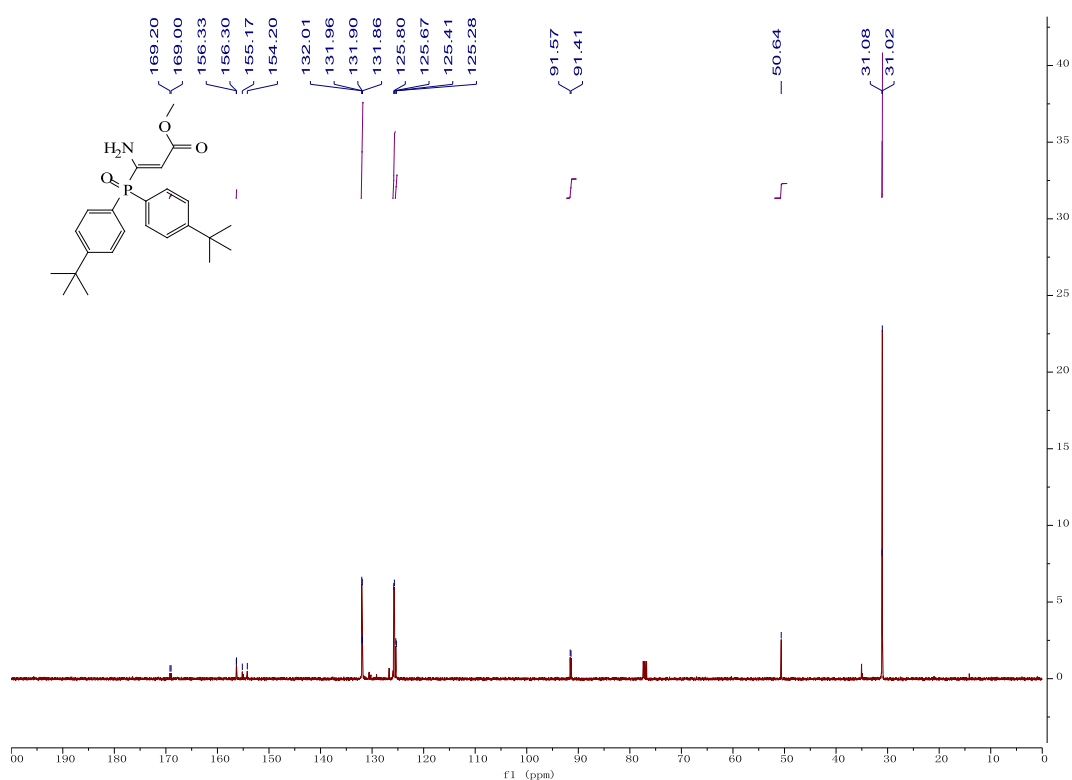

$^{31}\text{P}$  NMR (162 MHz,  $\text{CDCl}_3$ )

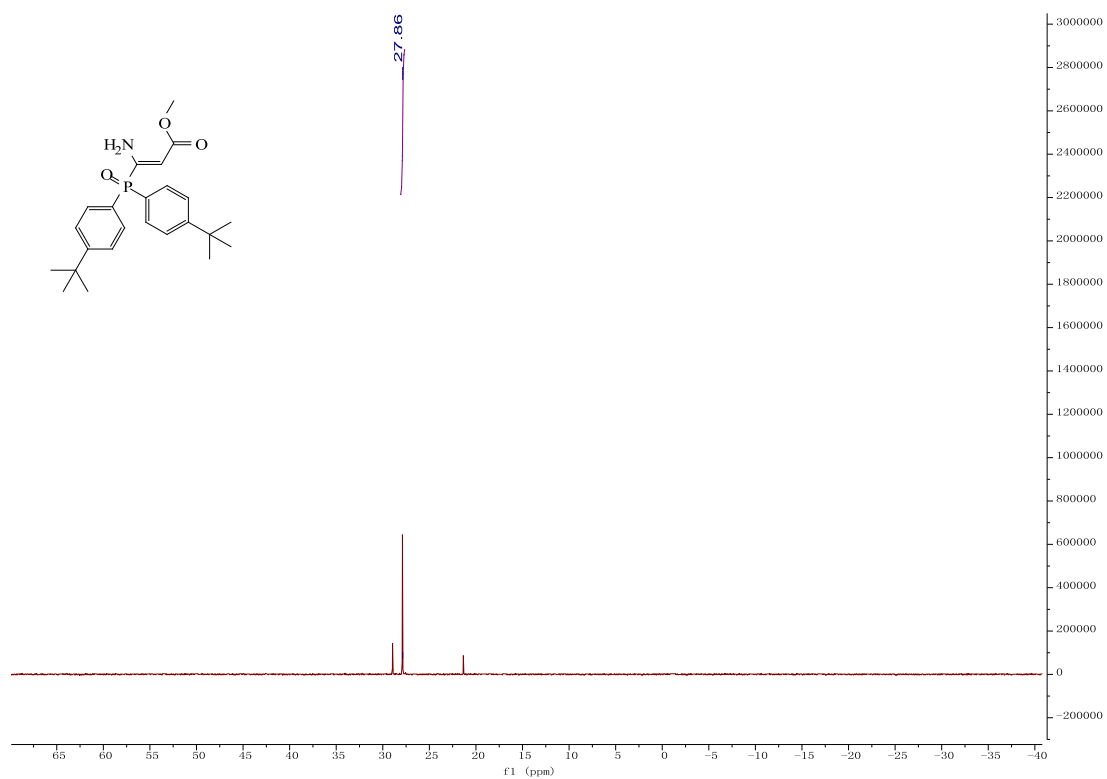

**Methyl 3-amino-3-(bis(4-methoxyphenyl)phosphoryl)acrylate (6)**

$^1\text{H}$  NMR (400 MHz,  $\text{CDCl}_3$ )

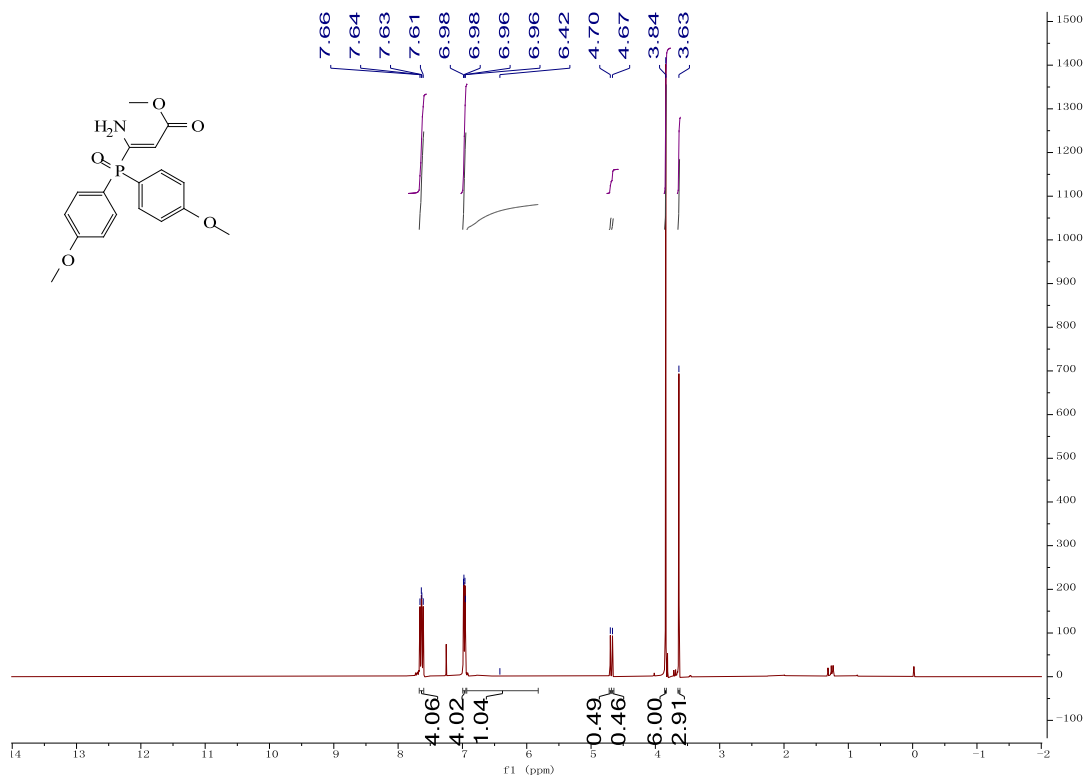

<sup>1</sup>H NMR (400 MHz, DMSO-d<sub>6</sub>)

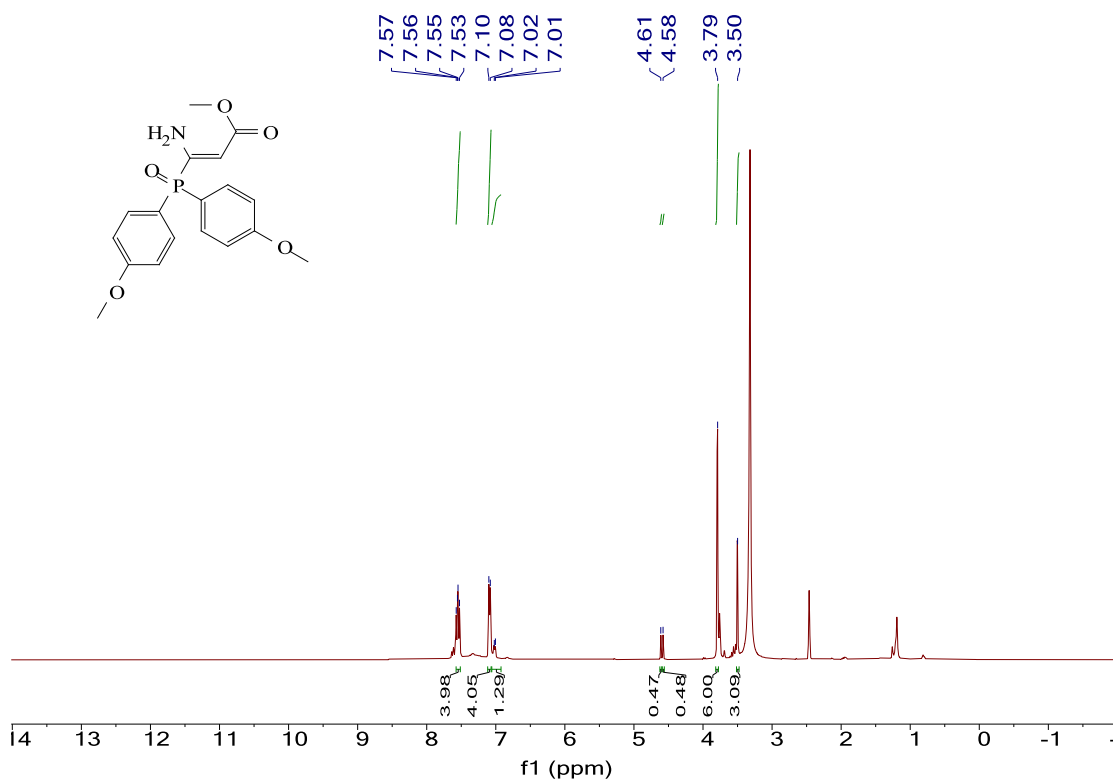

<sup>13</sup>C NMR (101 MHz, CDCl<sub>3</sub>)

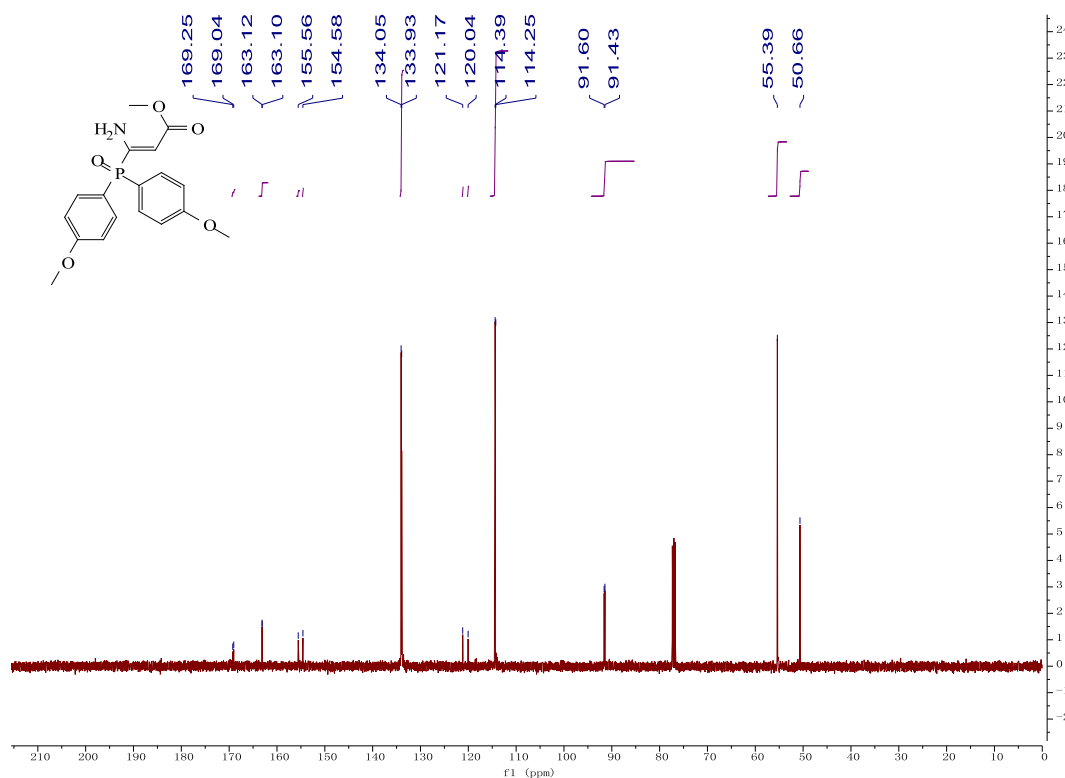

<sup>31</sup>P NMR (162 MHz, CDCl<sub>3</sub>)

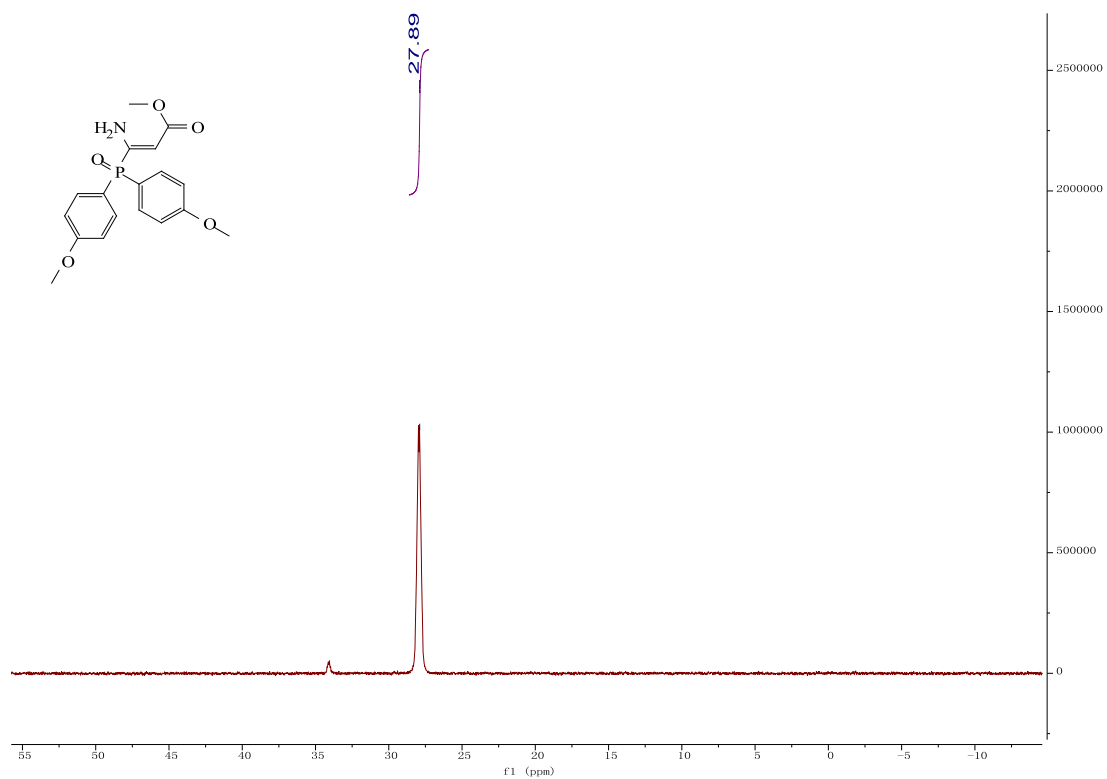

**Methyl-3-amino-3-(bis(4-(trifluoromethyl)phenyl)phosphoryl)acrylate (7)**

<sup>1</sup>H NMR (400 MHz, CDCl<sub>3</sub>)

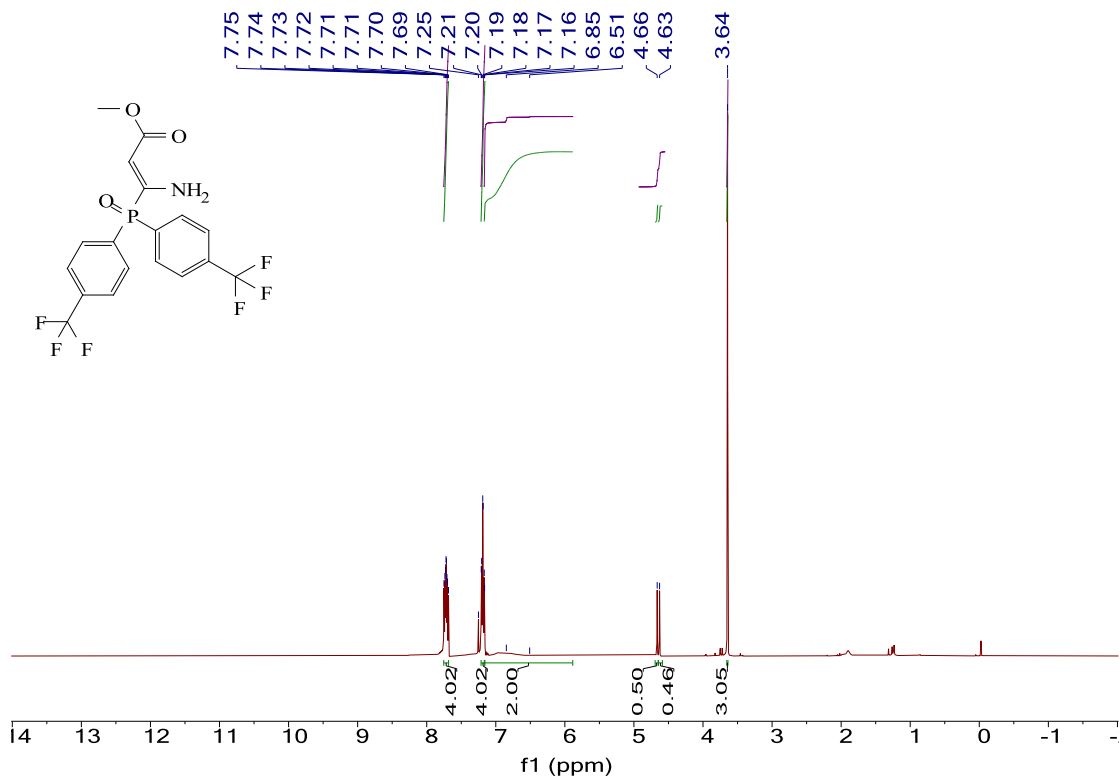

$^1\text{H}$  NMR (400 MHz,  $\text{DMSO-}d_6$ )

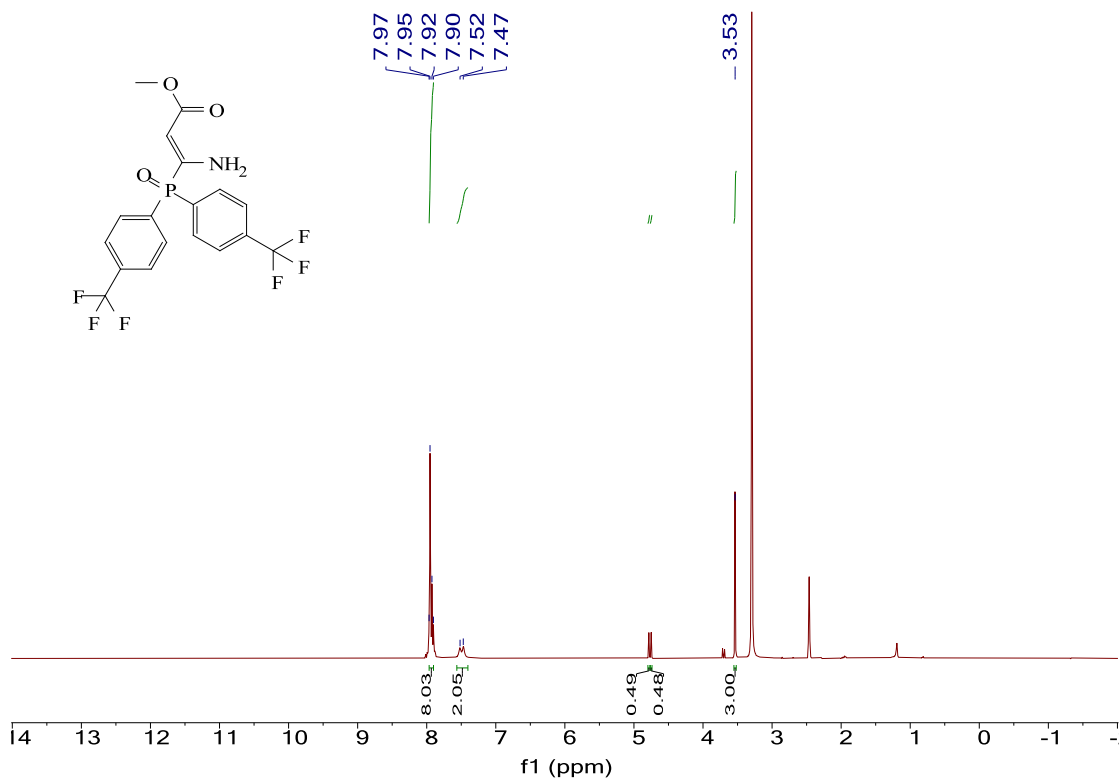

$^{13}\text{C}$  NMR (101 MHz,  $\text{CDCl}_3$ )

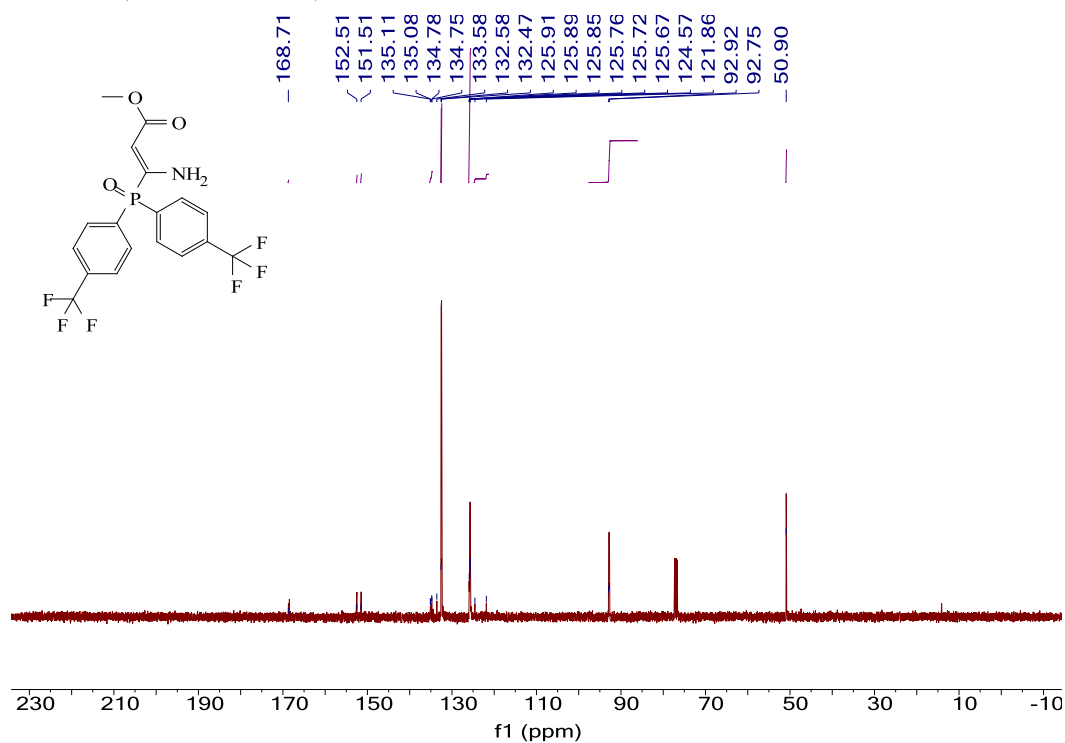



$^{31}\text{P}$  NMR (162 MHz,  $\text{CDCl}_3$ )

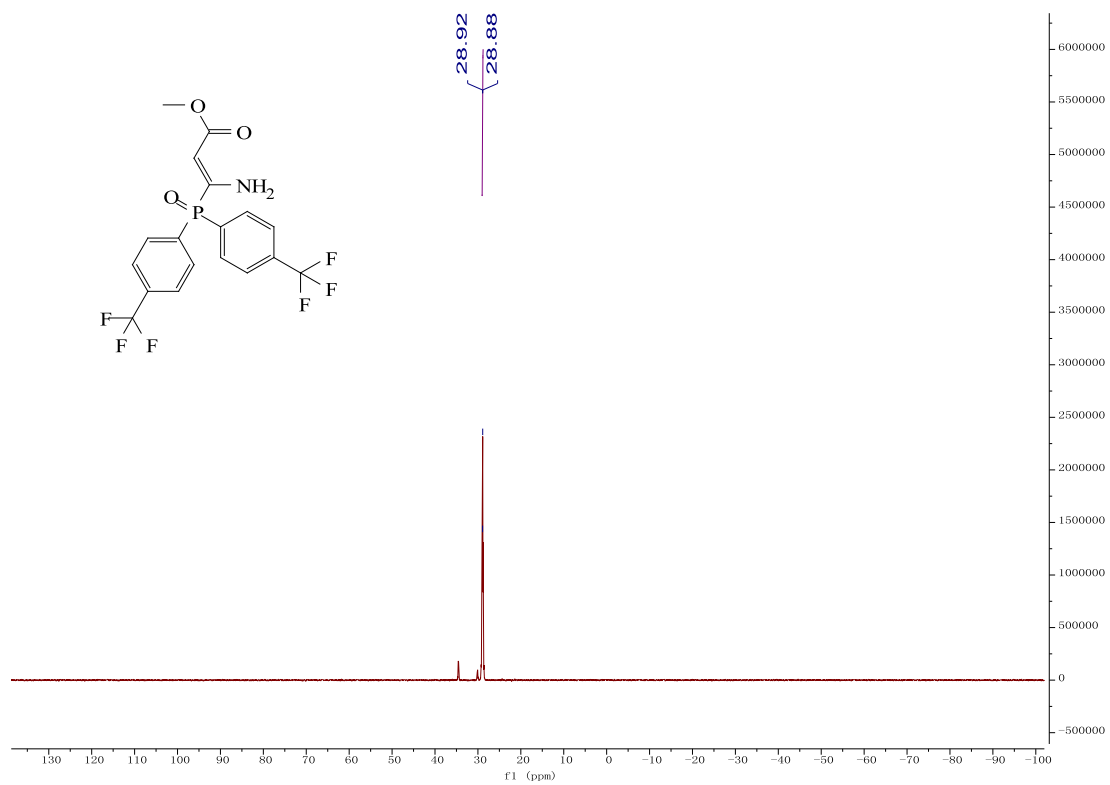

$^{19}\text{F}$  NMR (376 MHz,  $\text{CDCl}_3$ )

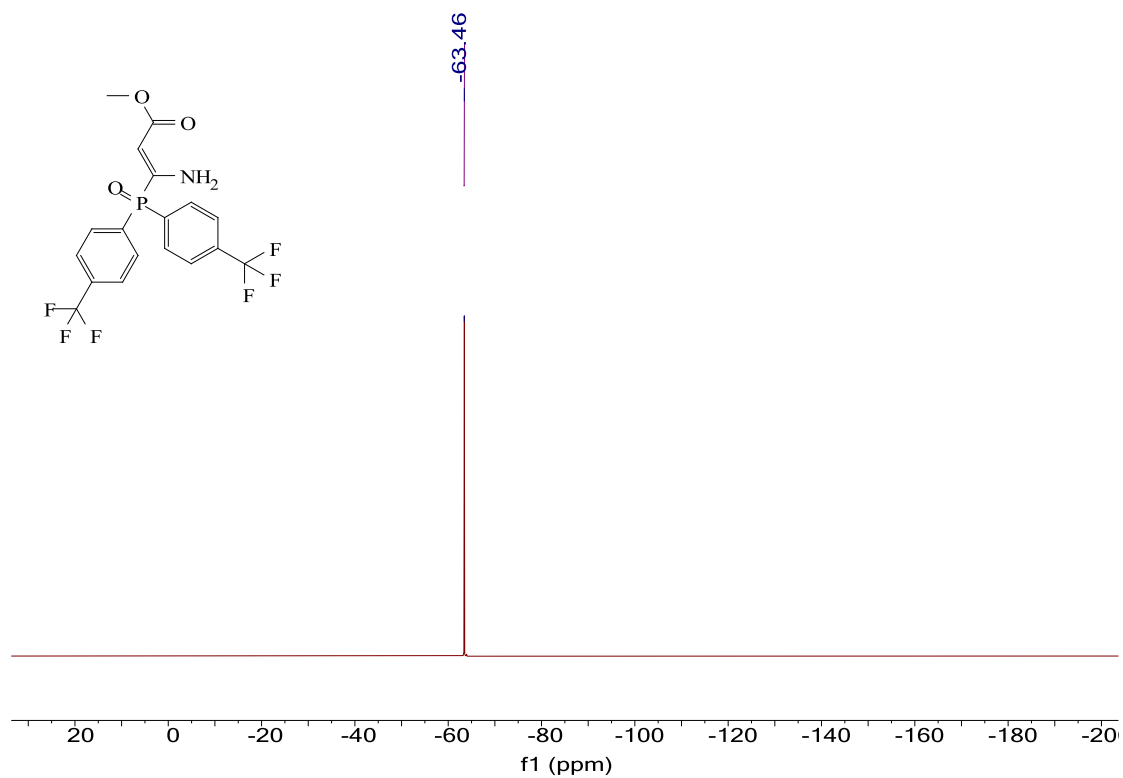

# Methyl 3-amino-3-(bis(3,5-dimethylphenyl)phosphoryl) acrylate (8)

$^1\text{H NMR}$  (400 MHz,  $\text{CDCl}_3$ )

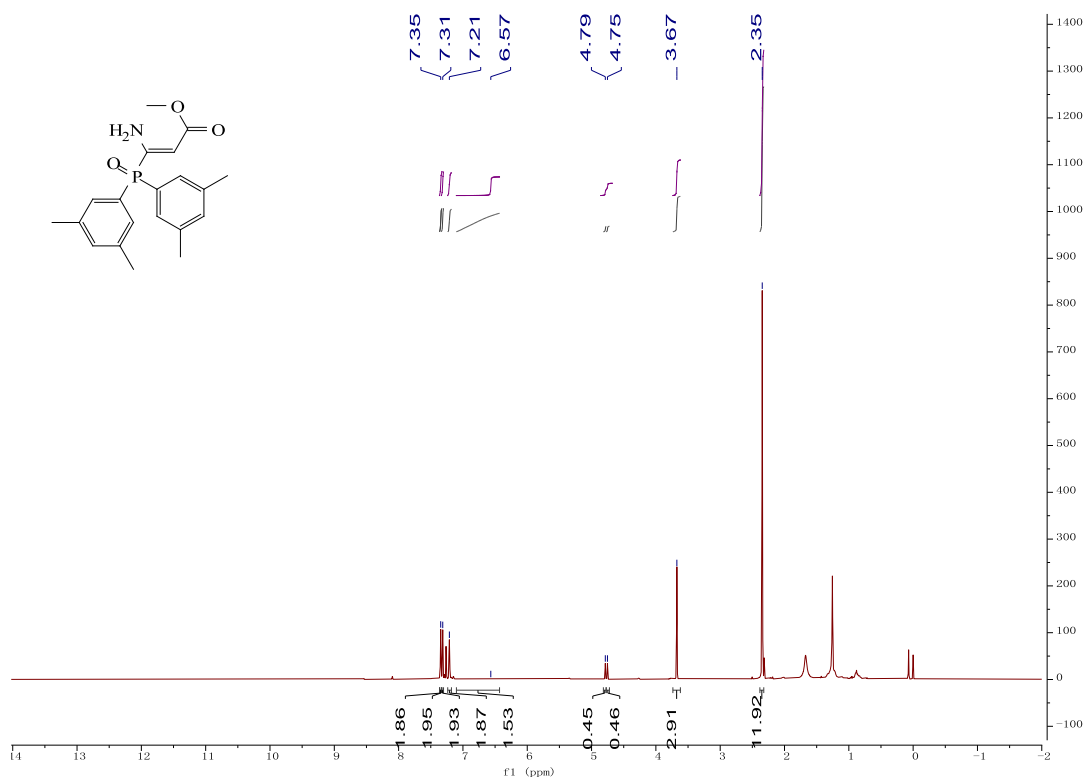

$^{13}\text{C NMR}$  (101 MHz,  $\text{CDCl}_3$ )

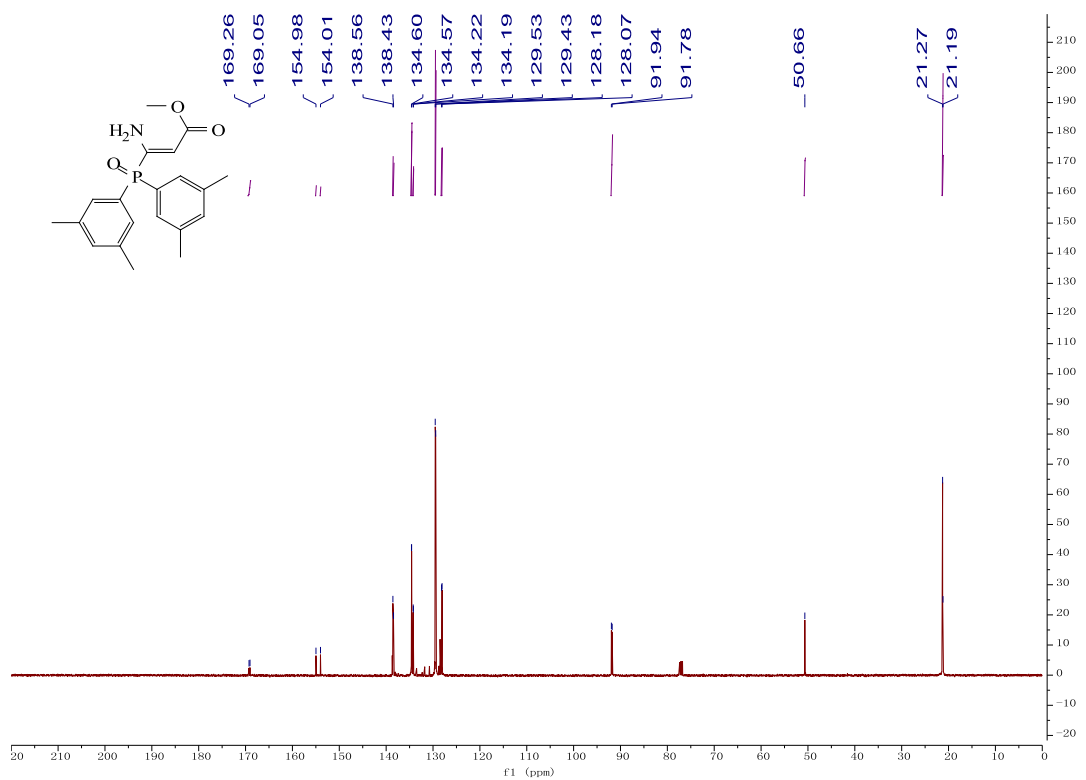

$^{31}\text{P}$  NMR (162 MHz,  $\text{CDCl}_3$ )

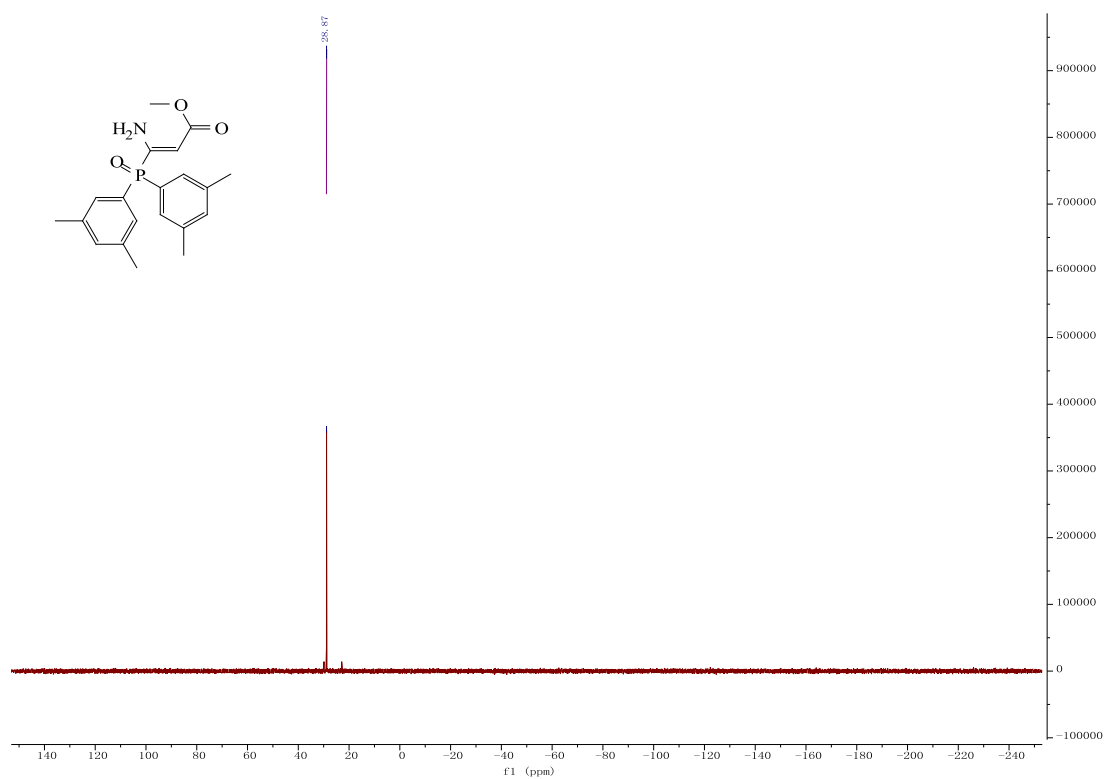

**Methyl 3-amino-3-(di([1,1'-biphenyl]-4-yl)phosphoryl)acrylate (9)**

$^1\text{H}$  NMR (400 MHz,  $\text{CDCl}_3$ )

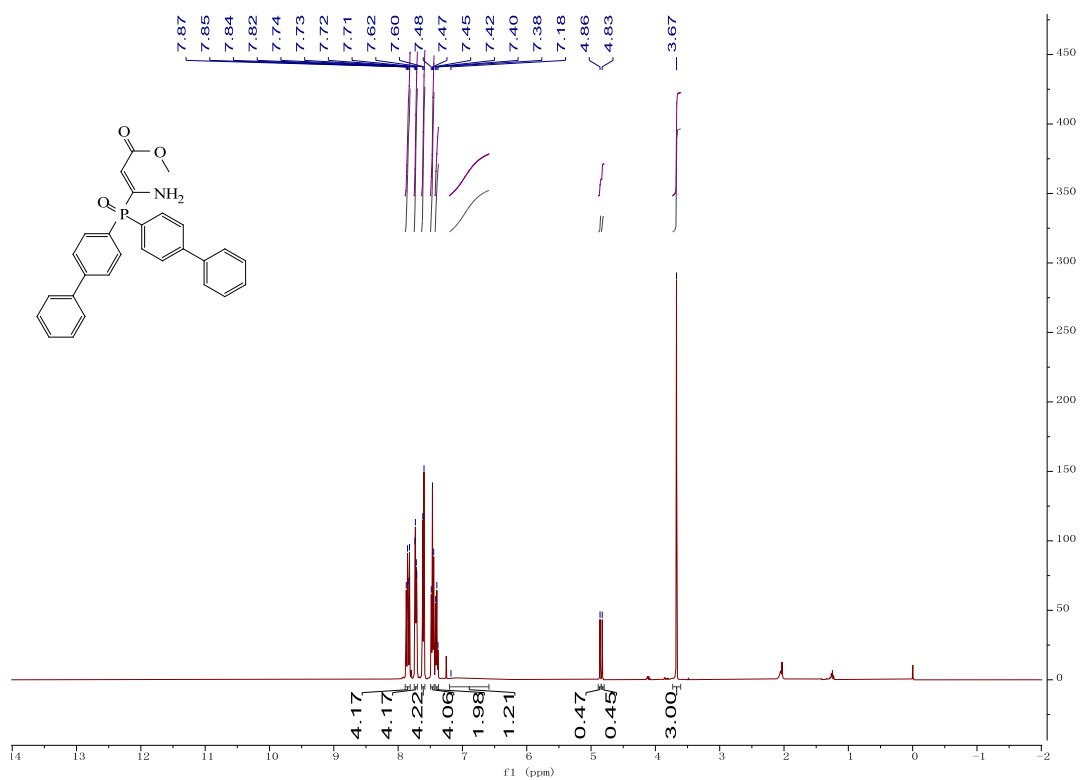

<sup>1</sup>H NMR (400 MHz, DMSO-d<sub>6</sub>)

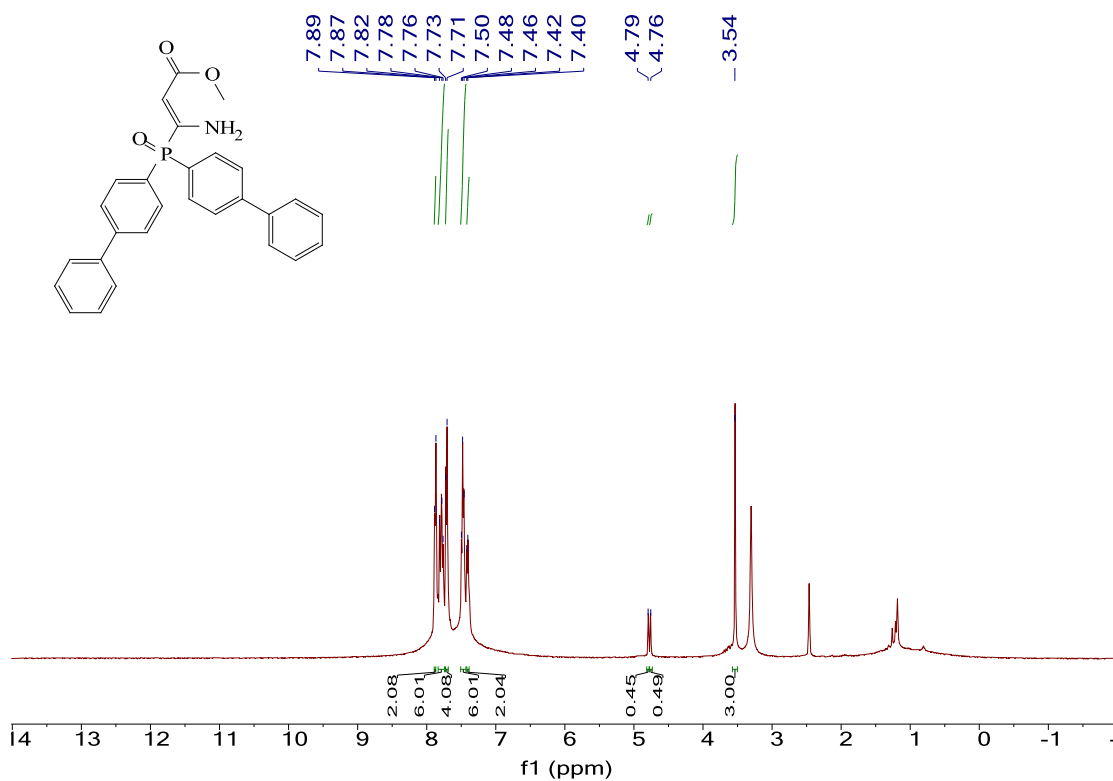

<sup>13</sup>C NMR (101 MHz, CDCl<sub>3</sub>)

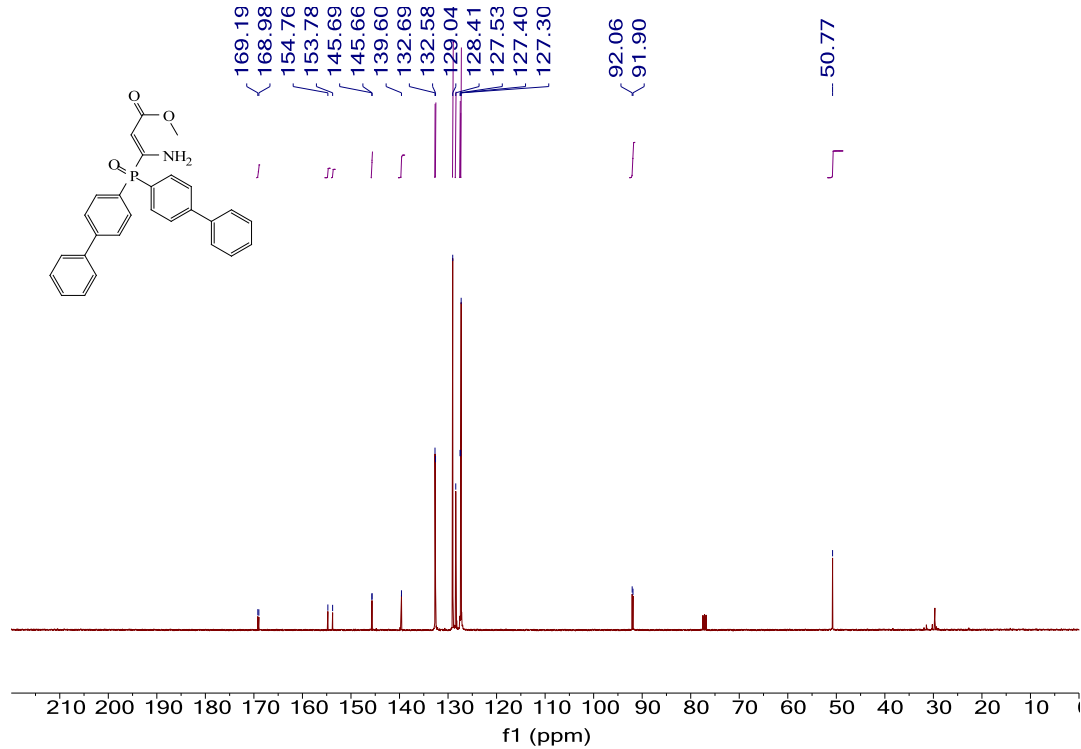

$^{31}\text{P}$  NMR (162 MHz,  $\text{CDCl}_3$ )

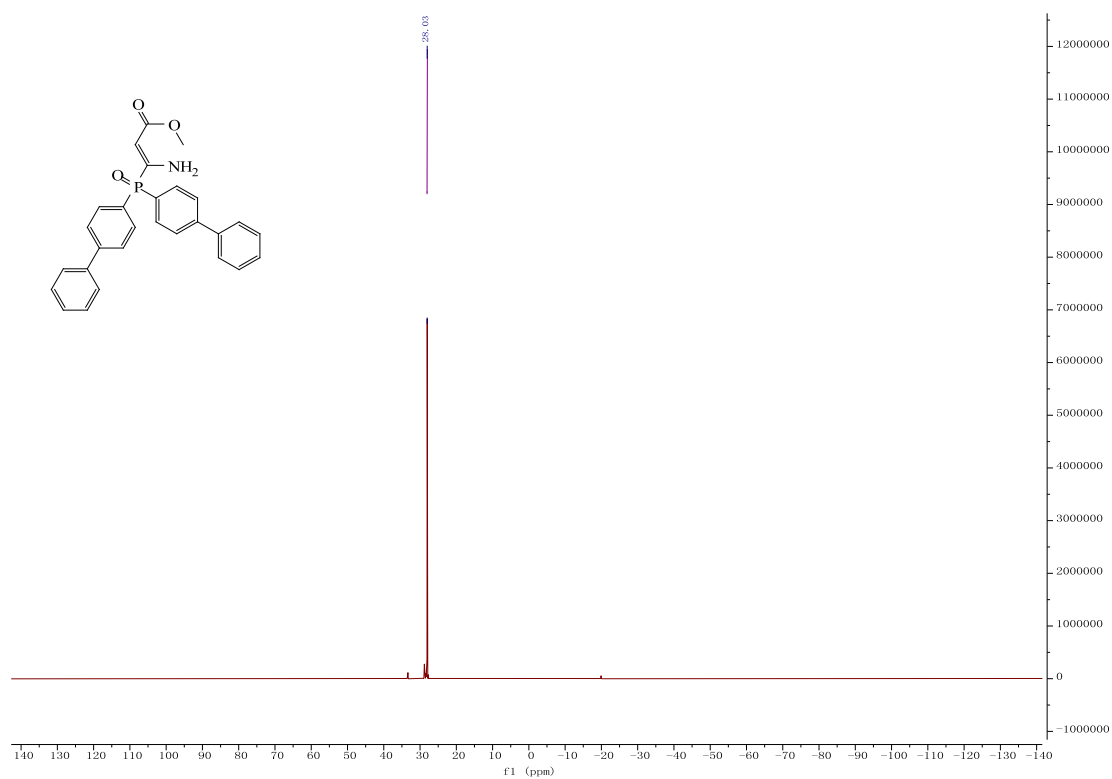

**Methyl -3-amino-3-(di(naphthalen-2-yl)phosphoryl)acrylate (10).**

$^1\text{H}$  NMR (400 MHz,  $\text{CDCl}_3$ )

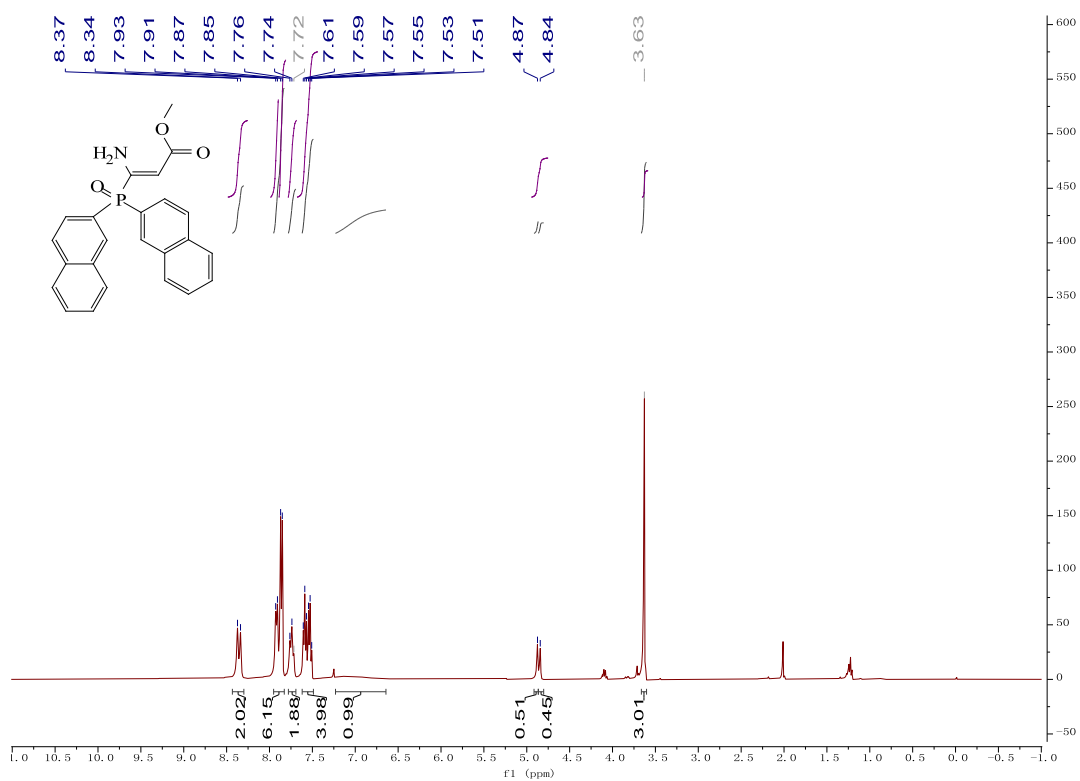

<sup>1</sup>H NMR (400 MHz, DMSO-d<sub>6</sub>)

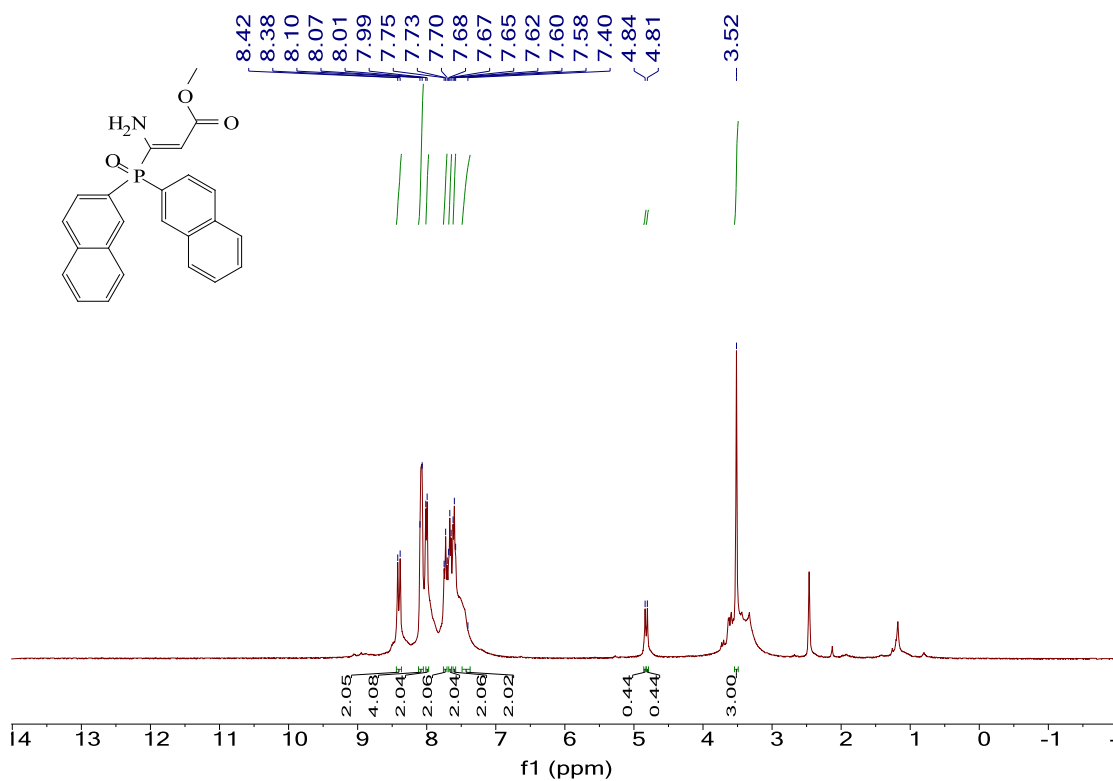

<sup>13</sup>C NMR (101 MHz, CDCl<sub>3</sub>)

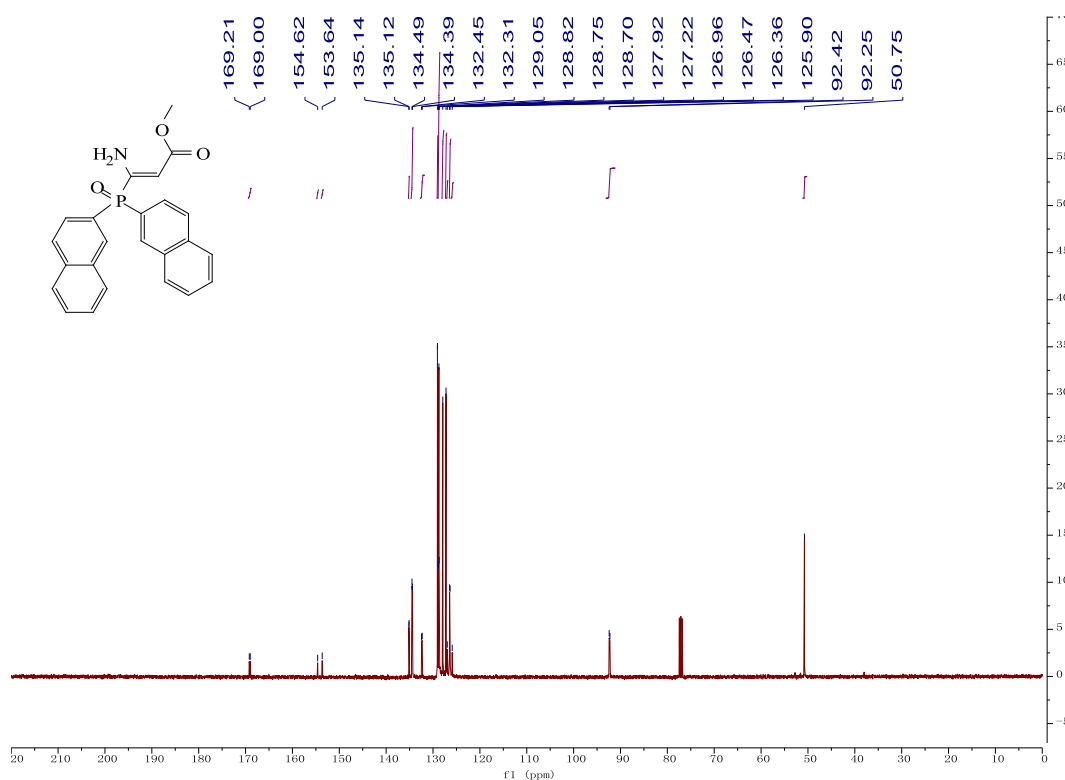

$^{31}\text{P}$  NMR (162 MHz,  $\text{CDCl}_3$ )

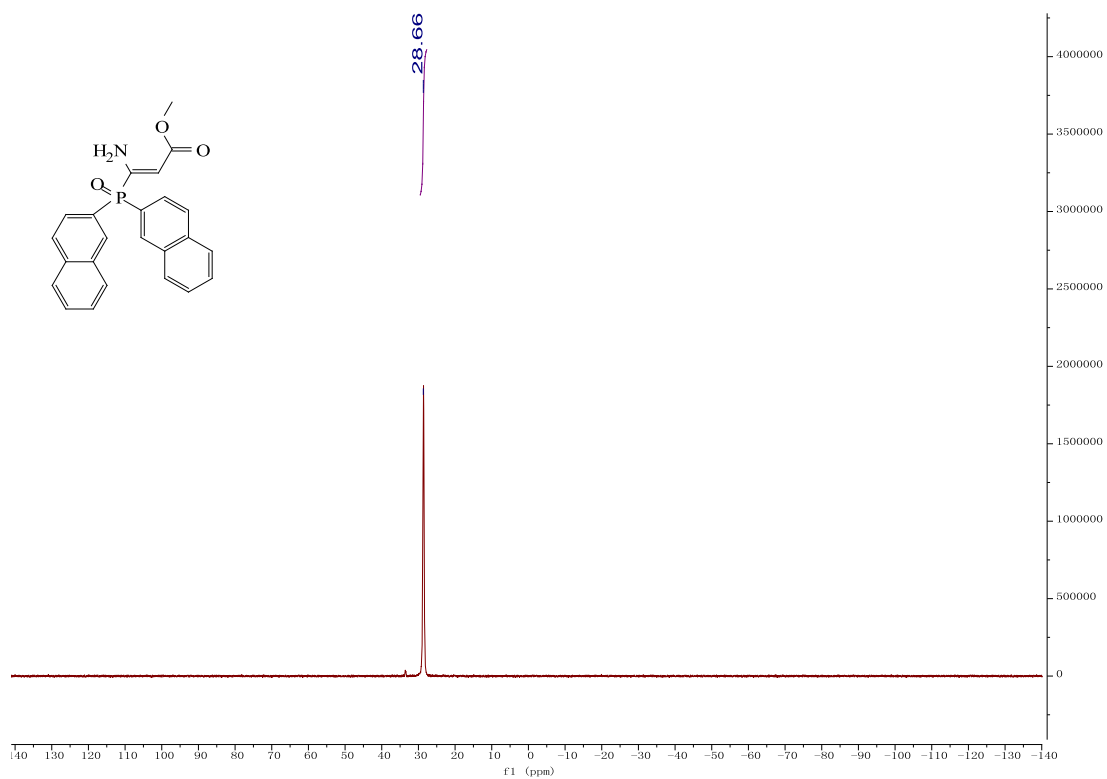

**Ethyl 3-amino-3-(diphenylphosphoryl)acrylate (12).**

$^1\text{H}$  NMR (400 MHz,  $\text{CDCl}_3$ )

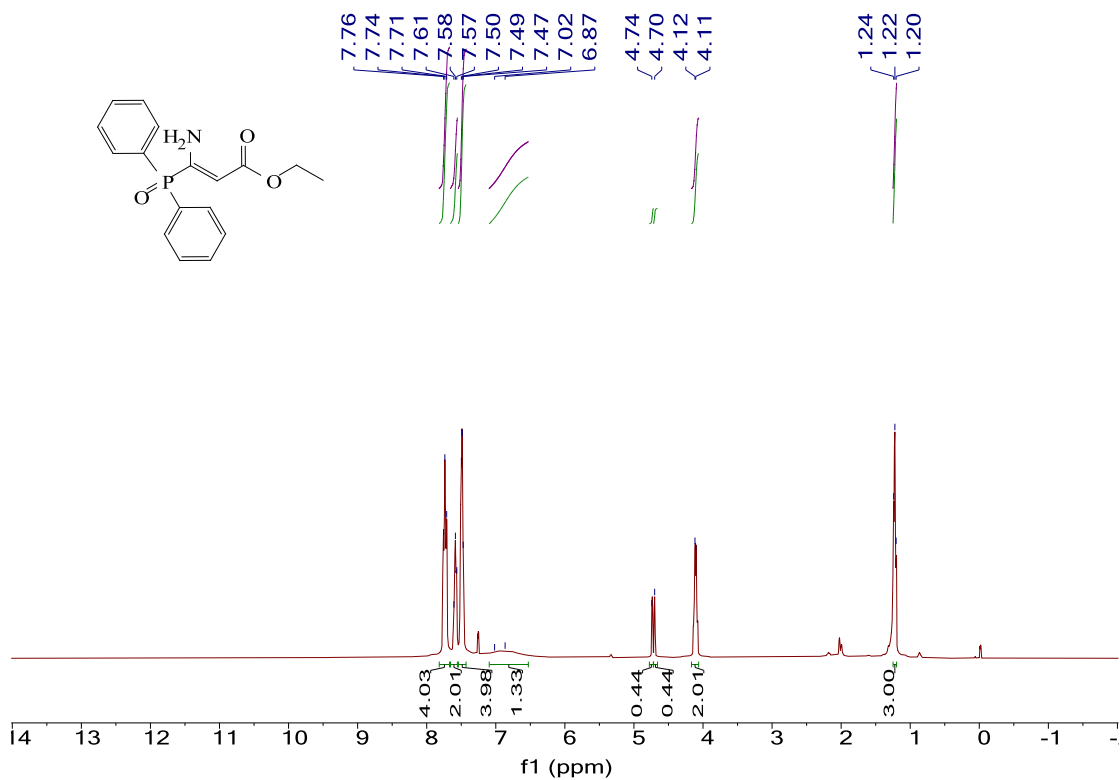

$^{13}\text{C}$  NMR (101 MHz,  $\text{CDCl}_3$ )

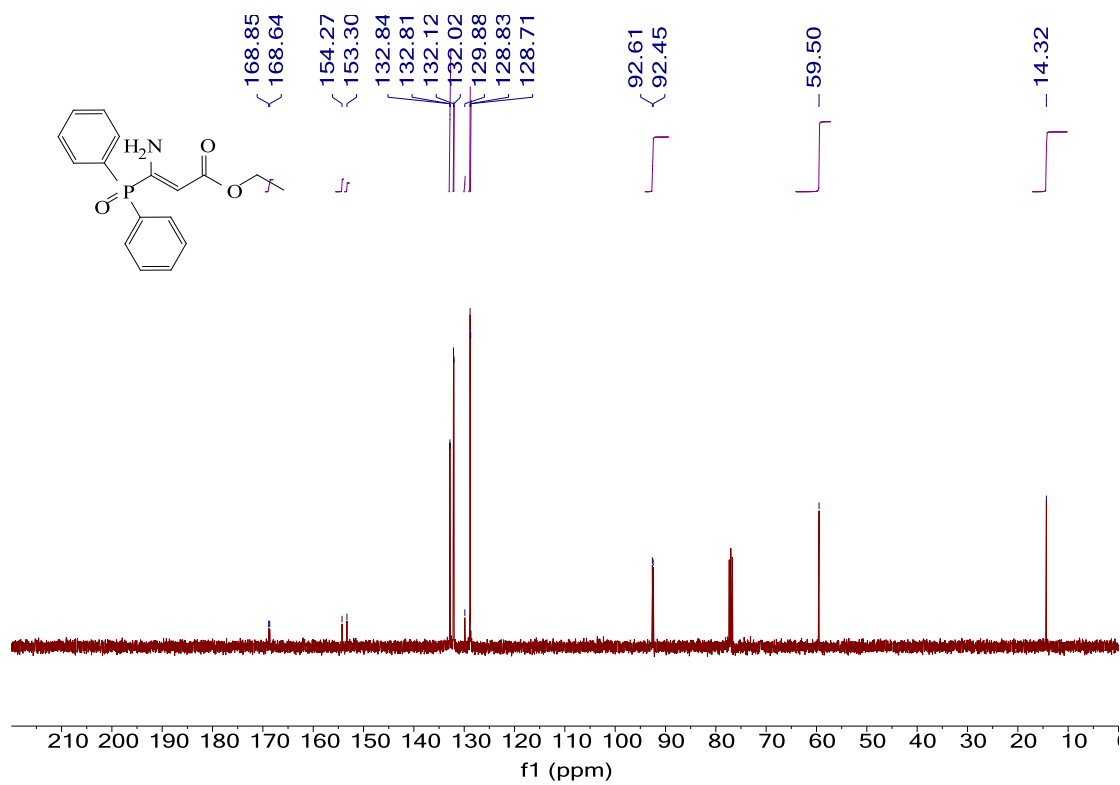

$^{31}\text{P}$  NMR (162 MHz,  $\text{CDCl}_3$ )

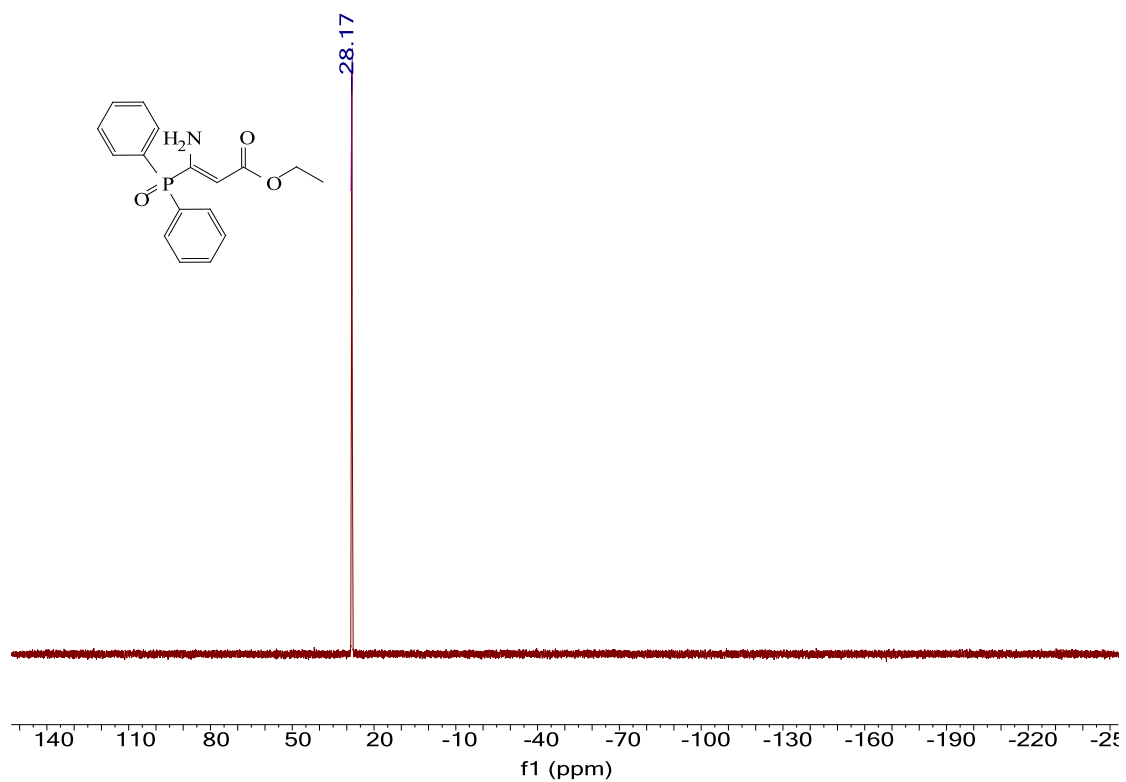



### Ethyl 3-amino-3-(diphenylphosphoryl)acrylate (13).

<sup>1</sup>H NMR (400 MHz, CDCl<sub>3</sub>)

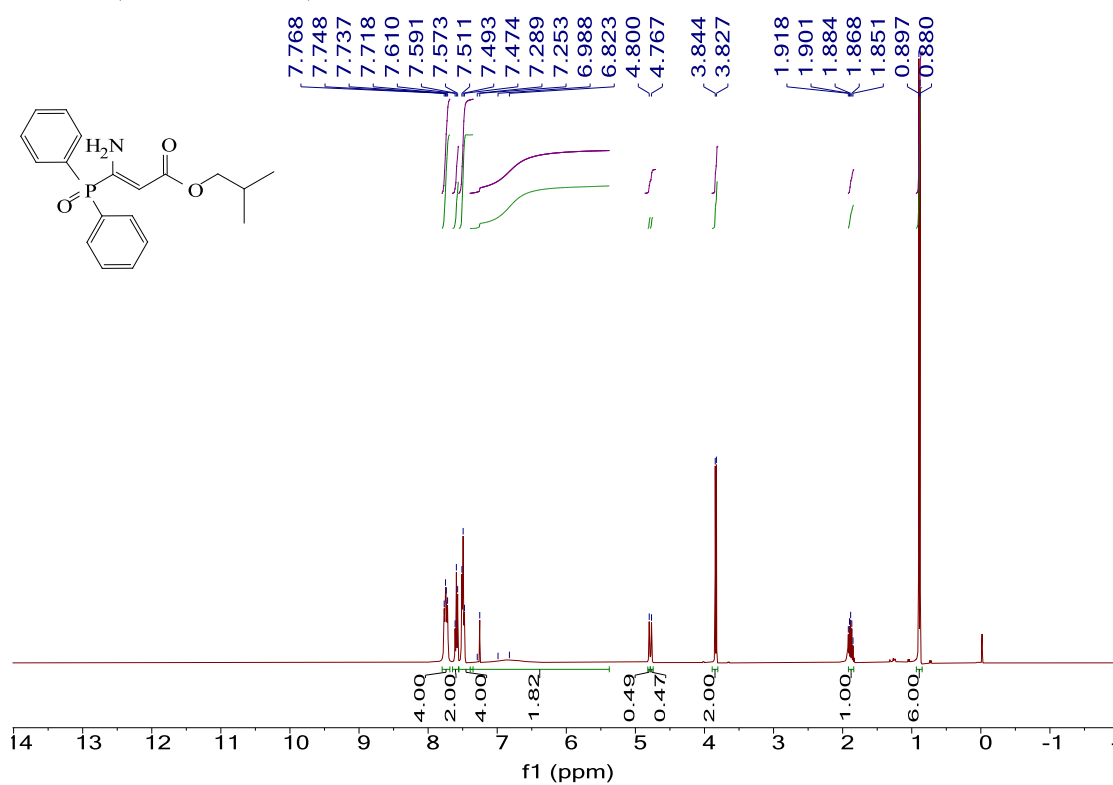

<sup>1</sup>H NMR (400 MHz, DMSO-*d*<sub>6</sub>)

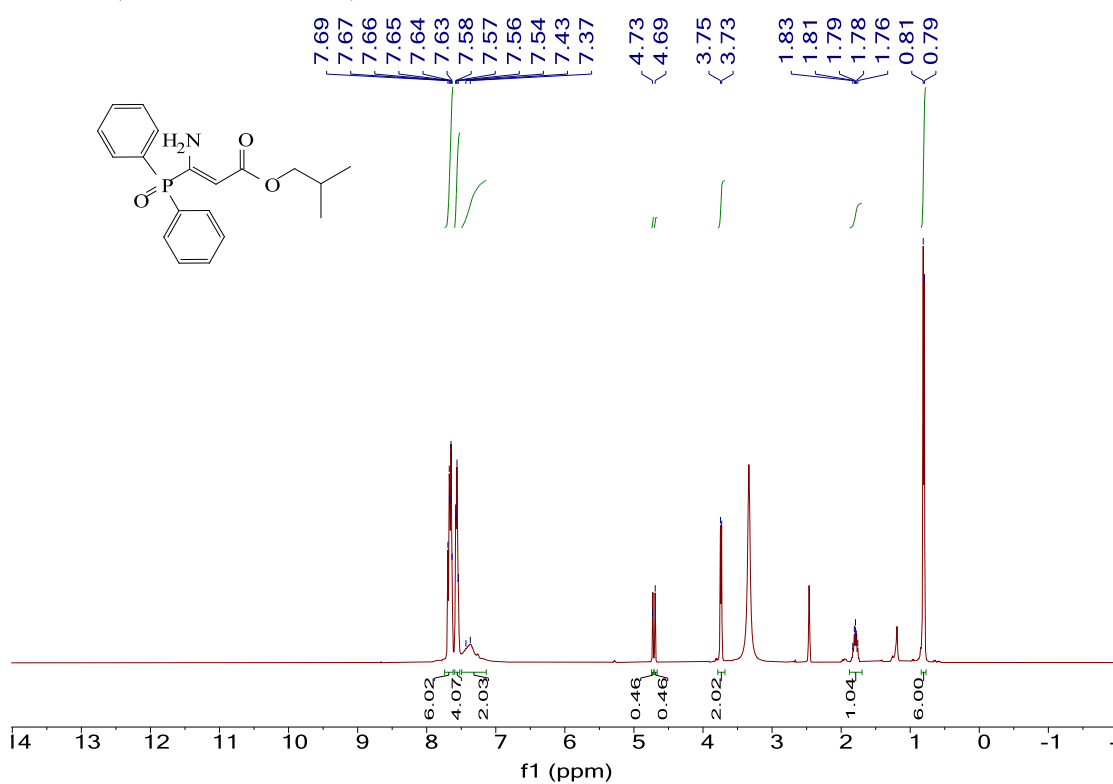

$^{13}\text{C}$  NMR (101 MHz,  $\text{CDCl}_3$ )

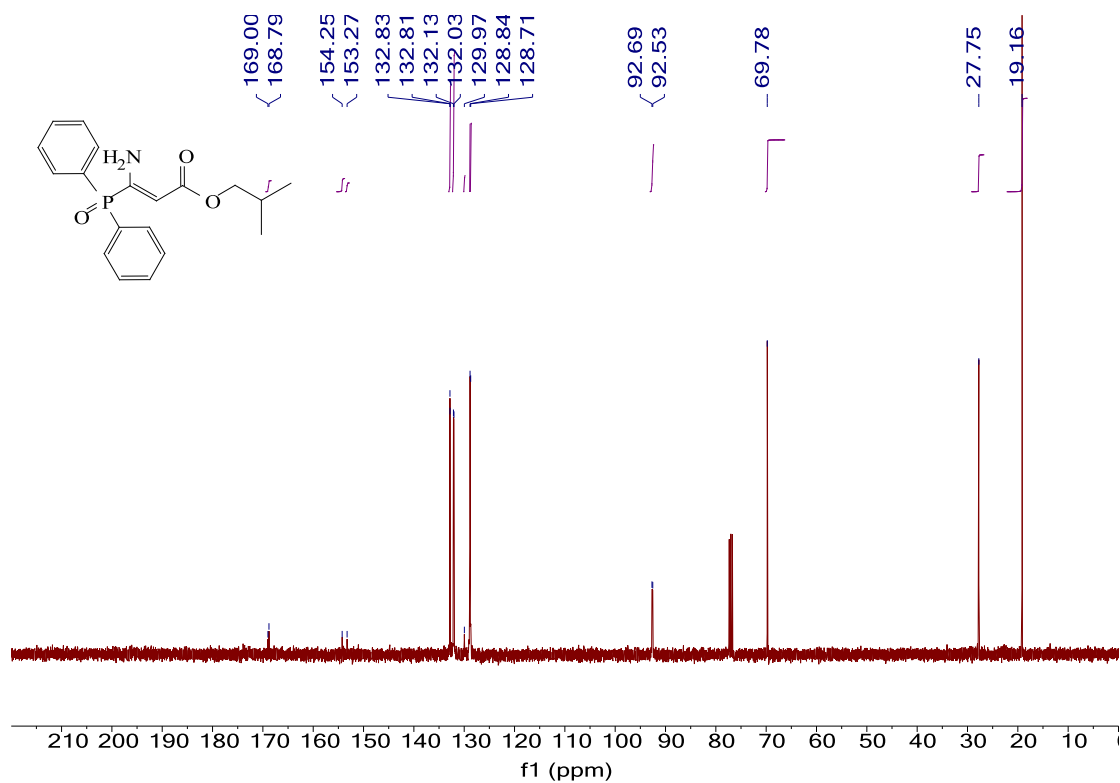

$^{31}\text{P}$  NMR (162 MHz,  $\text{CDCl}_3$ )

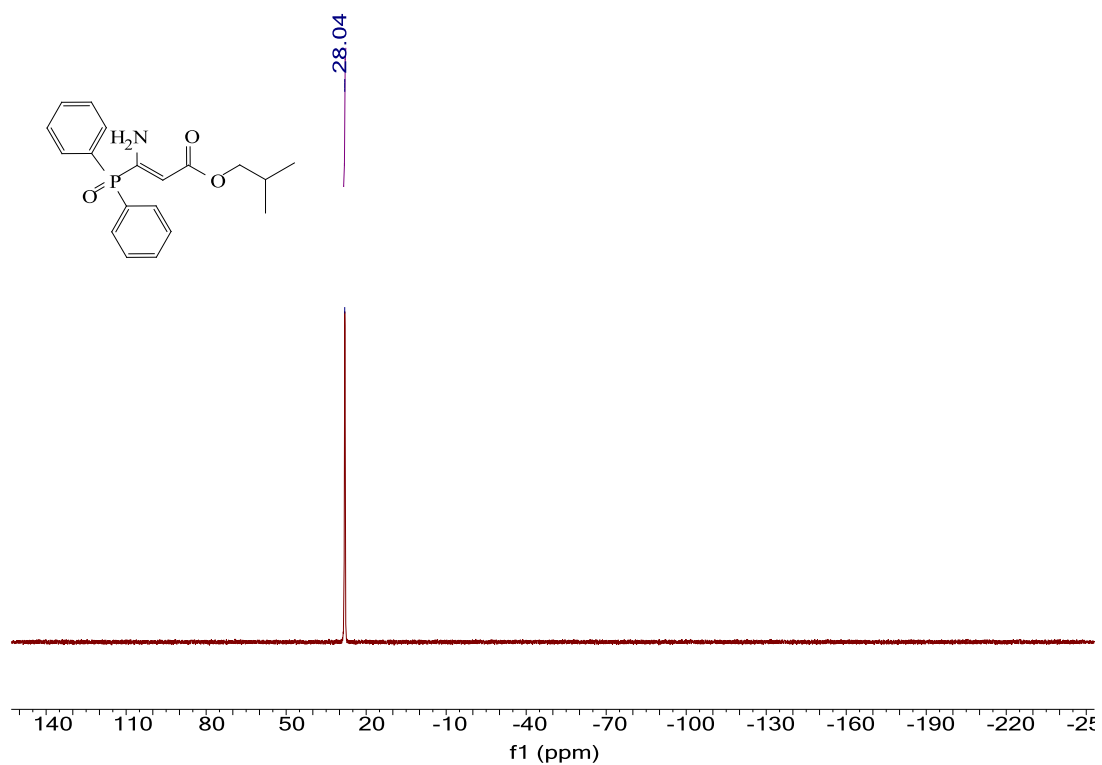

### Butyl 3-amino-3-(diphenylphosphoryl)acrylate (14).

$^1\text{H NMR}$  (400 MHz,  $\text{CDCl}_3$ )

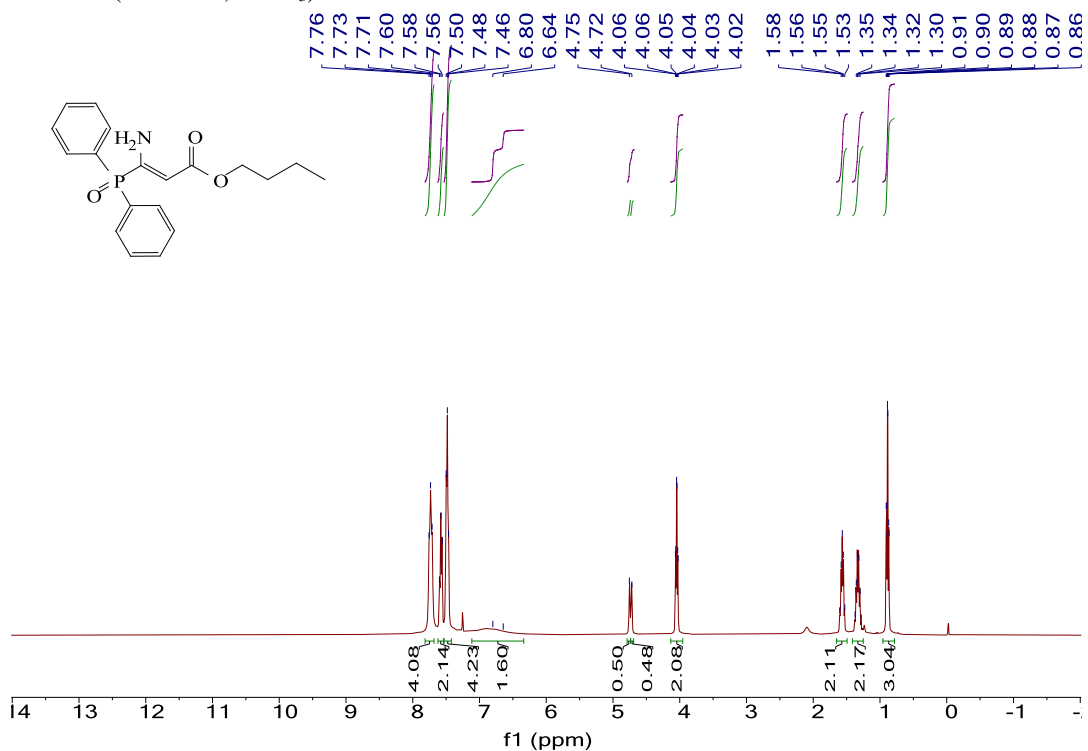

$^1\text{H NMR}$  (400 MHz,  $\text{DMSO}-d_6$ )

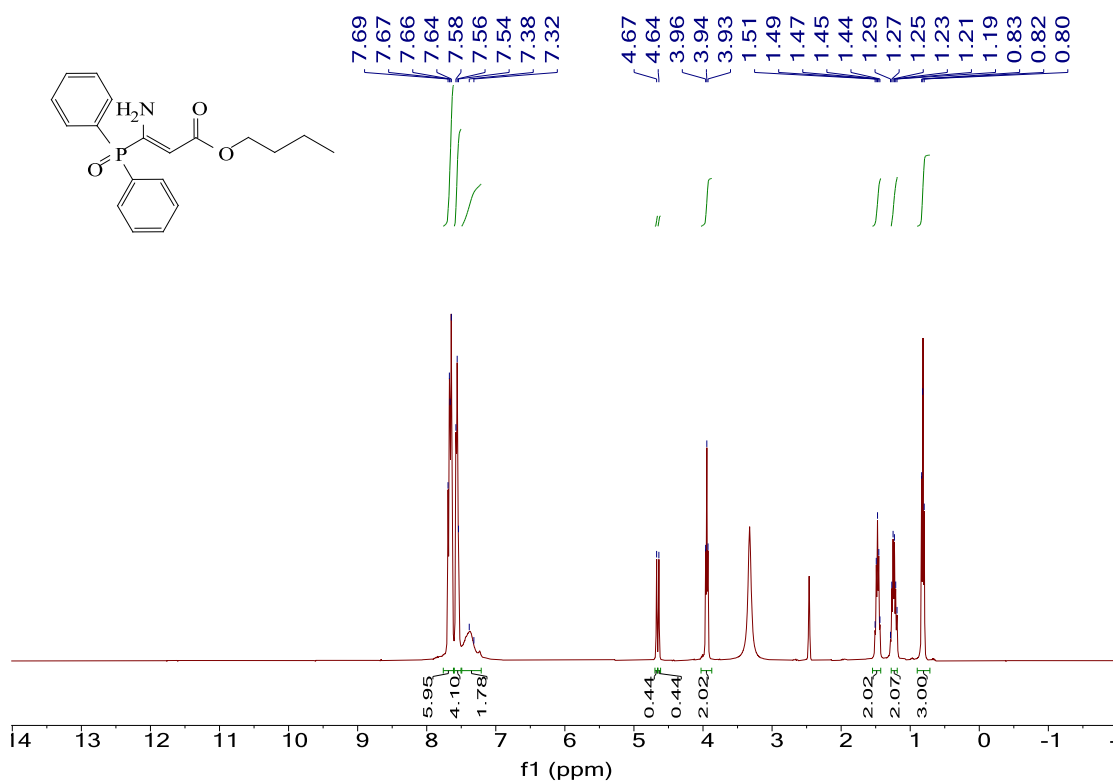

$^{13}\text{C}$  NMR (101 MHz,  $\text{CDCl}_3$ )

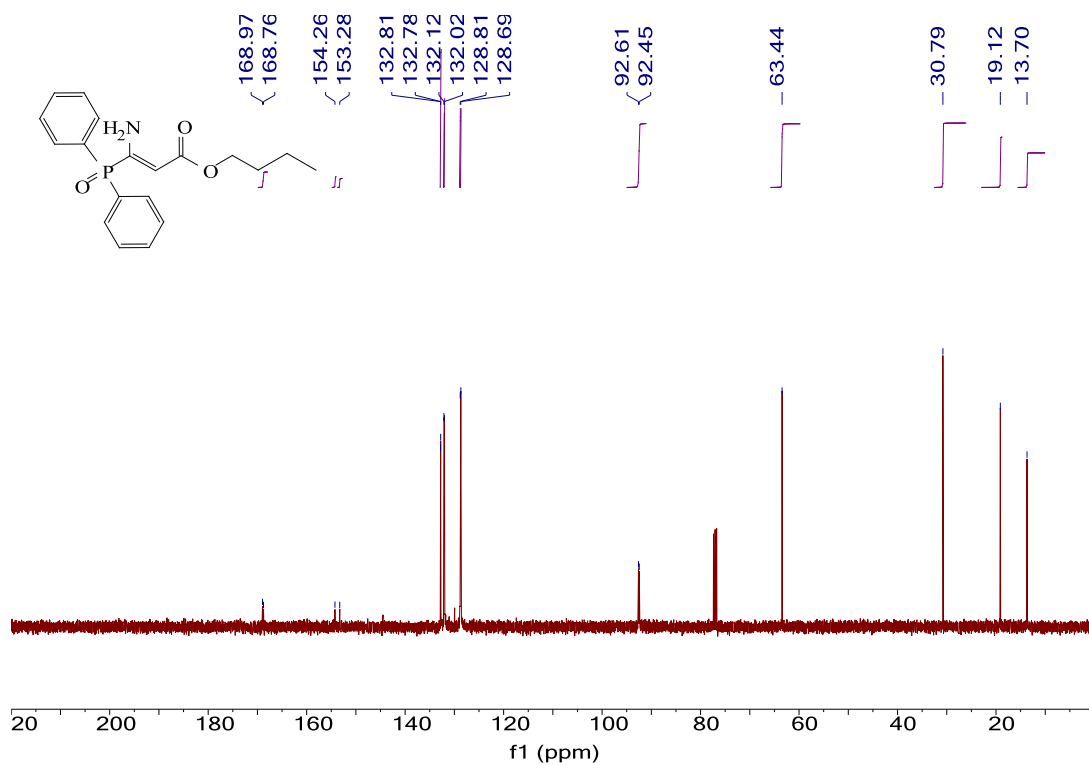

$^{31}\text{P}$  NMR (162 MHz,  $\text{CDCl}_3$ )

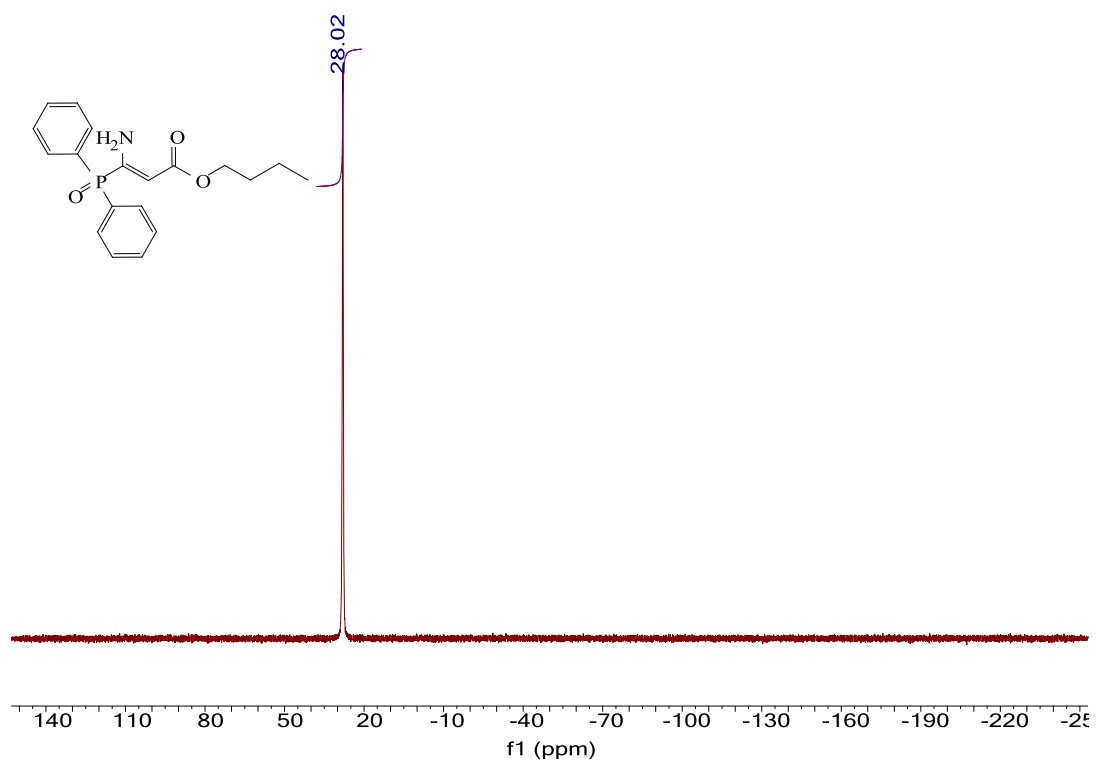

### Octyl 3-amino-3-(diphenylphosphoryl)acrylate (15)

<sup>1</sup>H NMR (400 MHz, CDCl<sub>3</sub>)

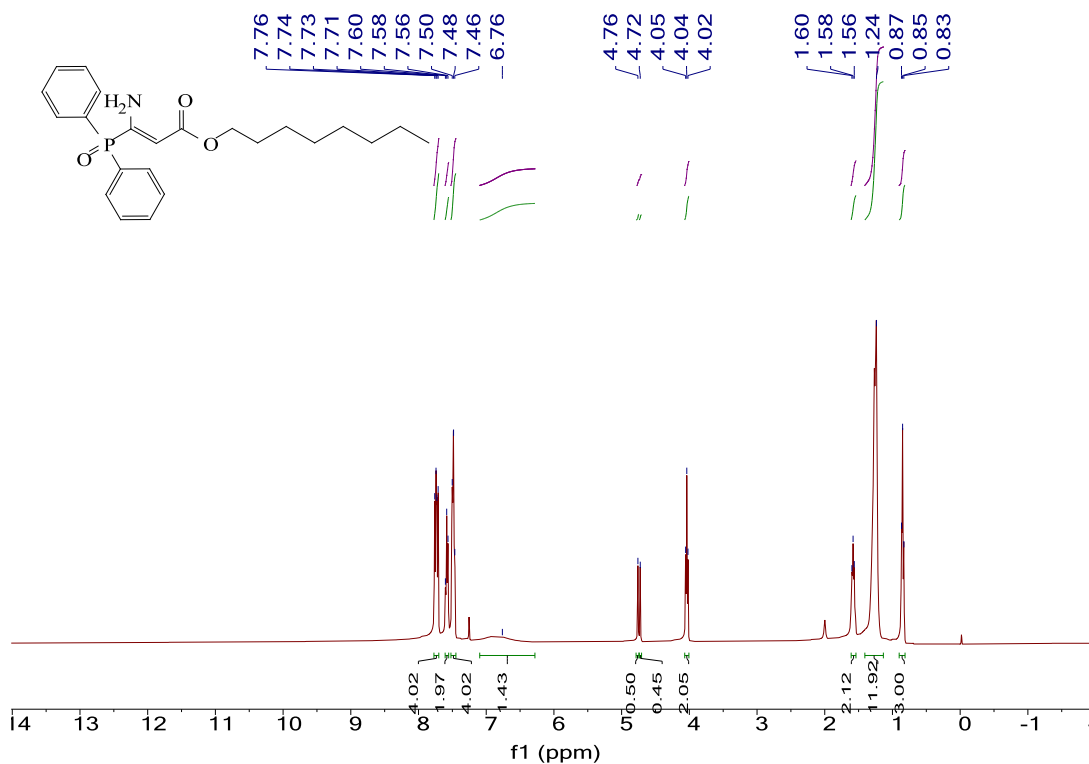

<sup>13</sup>C NMR (101 MHz, CDCl<sub>3</sub>)

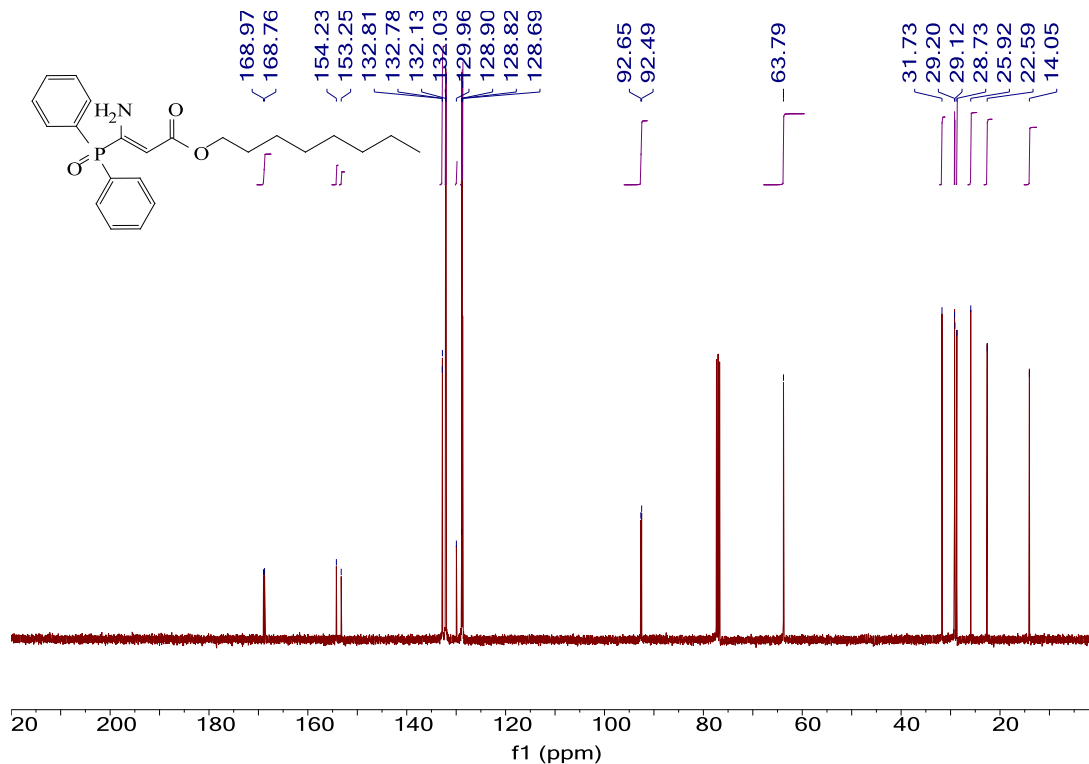

<sup>31</sup>P NMR (162 MHz, CDCl<sub>3</sub>)

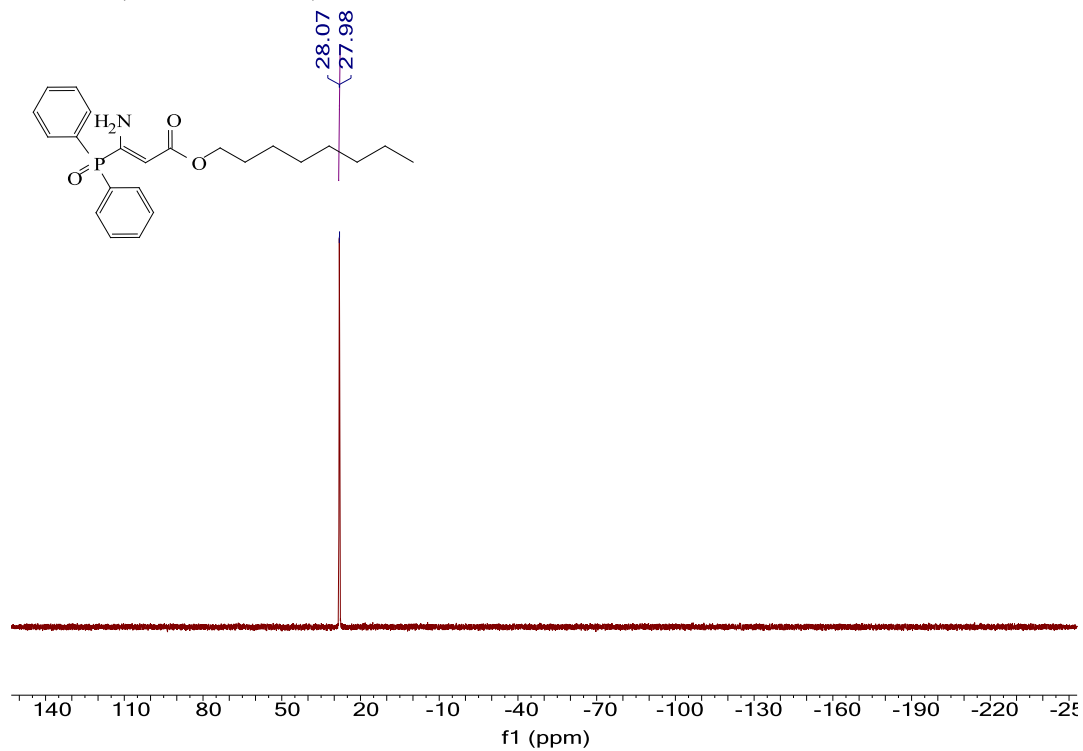

### Allyl 3-amino-3-(diphenylphosphoryl)acrylate (16).

<sup>1</sup>H NMR (400 MHz, CDCl<sub>3</sub>)

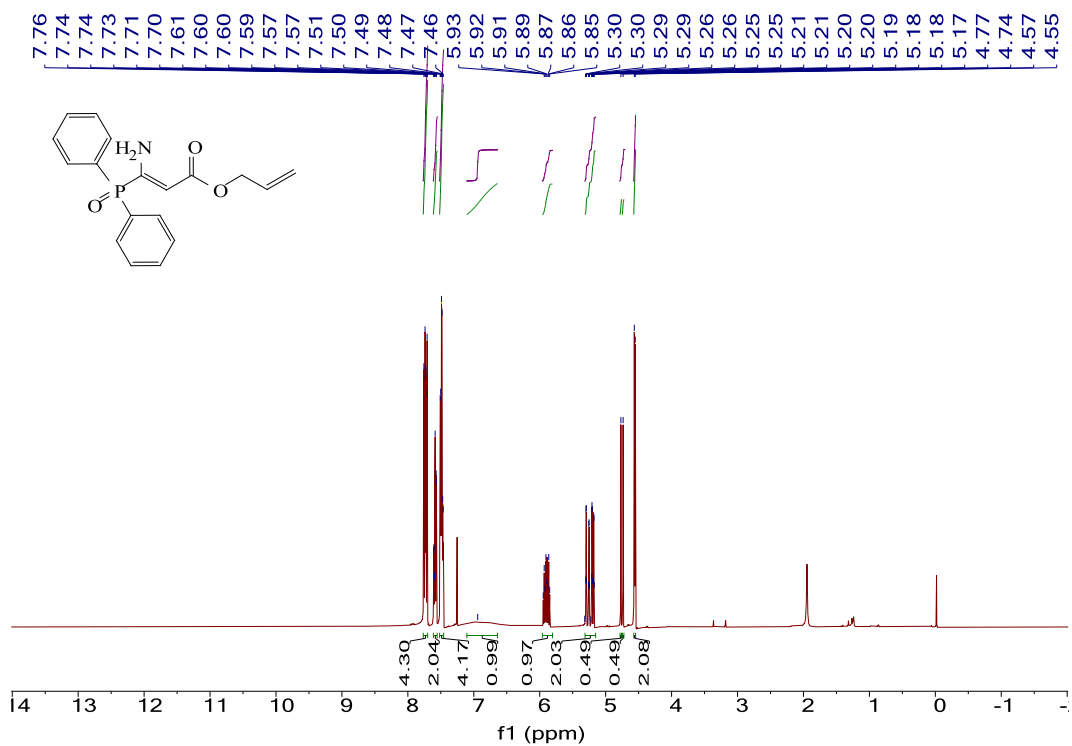

<sup>13</sup>C NMR (101 MHz, CDCl<sub>3</sub>)

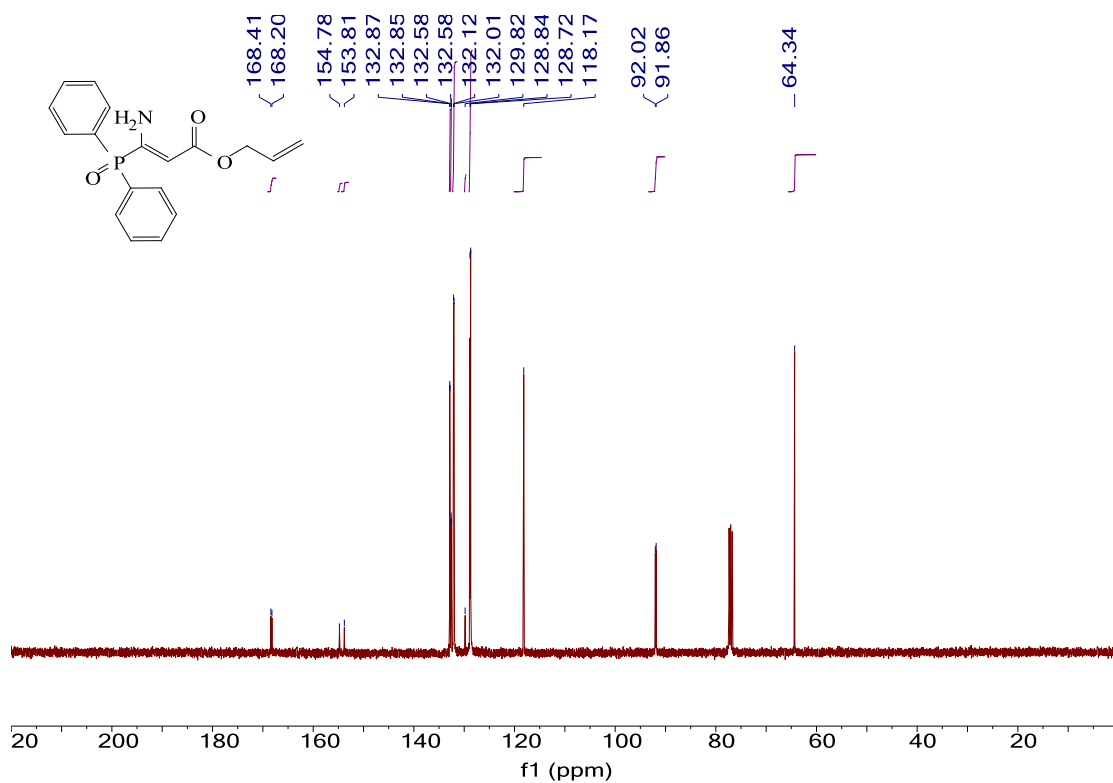

<sup>31</sup>P NMR (162 MHz, CDCl<sub>3</sub>)

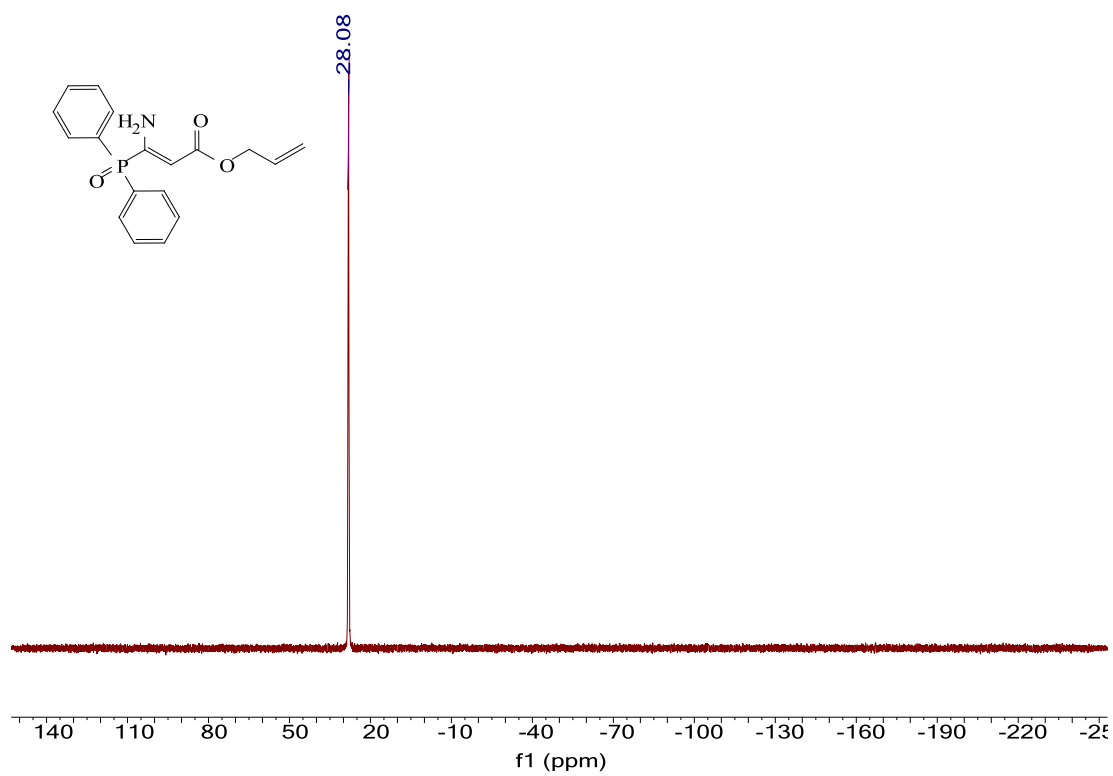

### Ethyl 3-amino-3-(diphenylphosphoryl)-2-methylacrylate (17)

$^1\text{H NMR}$  (400 MHz,  $\text{CDCl}_3$ )

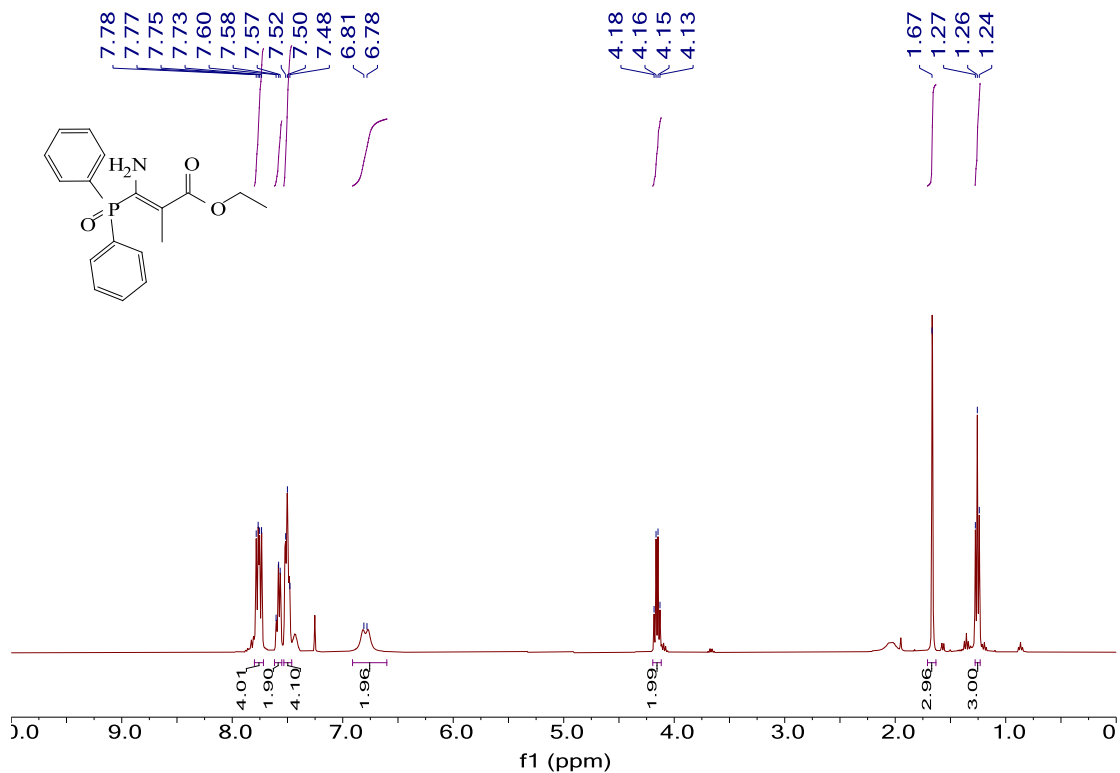

$^{13}\text{C NMR}$  (101 MHz,  $\text{CDCl}_3$ )

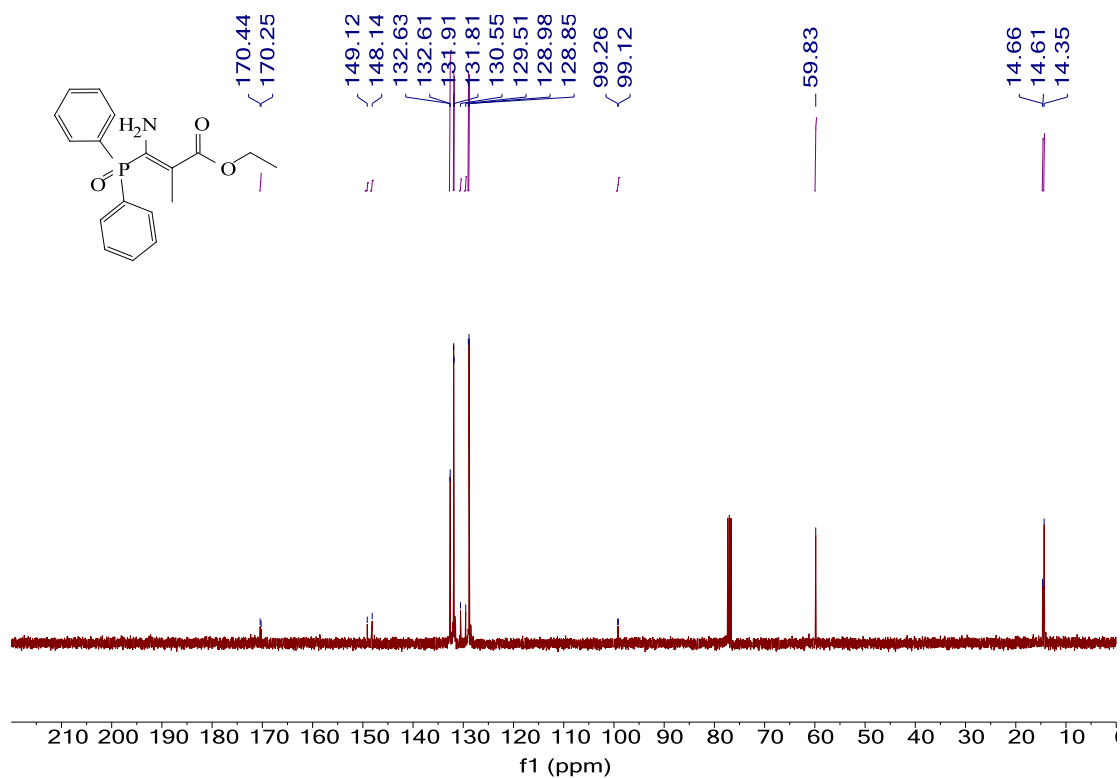



$^{31}\text{P}$  NMR (162 MHz,  $\text{CDCl}_3$ )

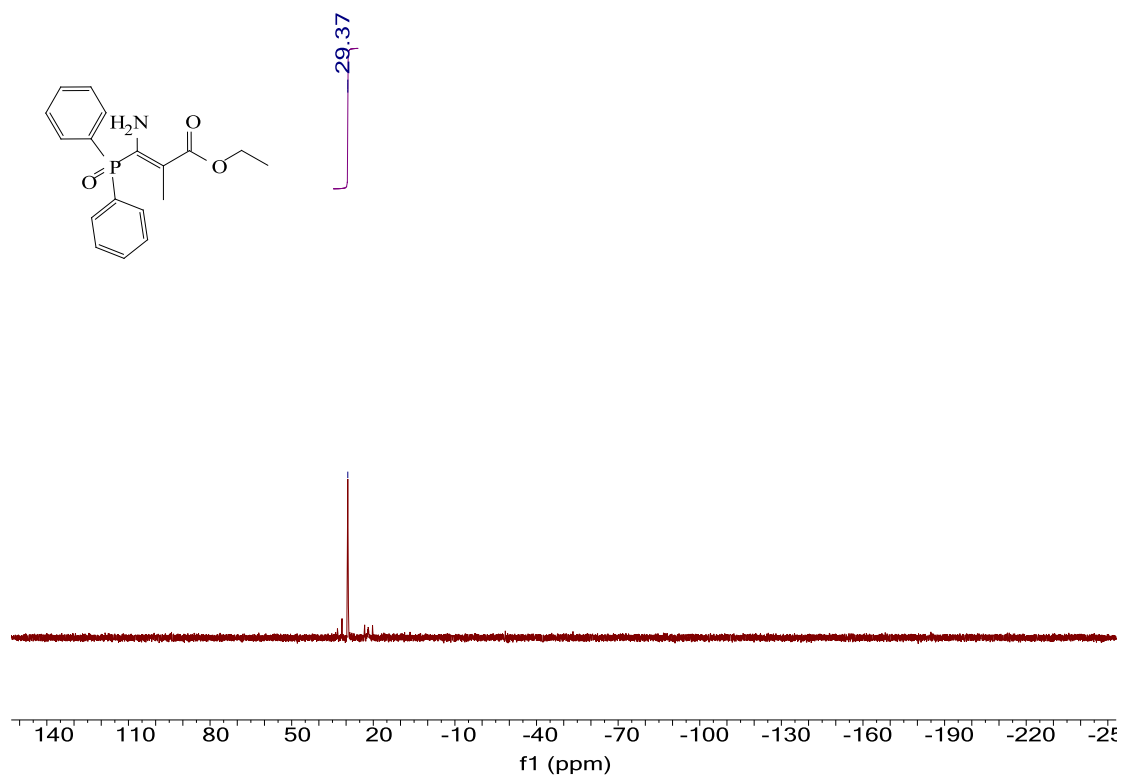

**Ethyl 3-amino-2-(cyanomethyl)-3-(diphenylphosphoryl) acrylate (18)**

$^1\text{H}$  NMR (400 MHz,  $\text{CDCl}_3$ )

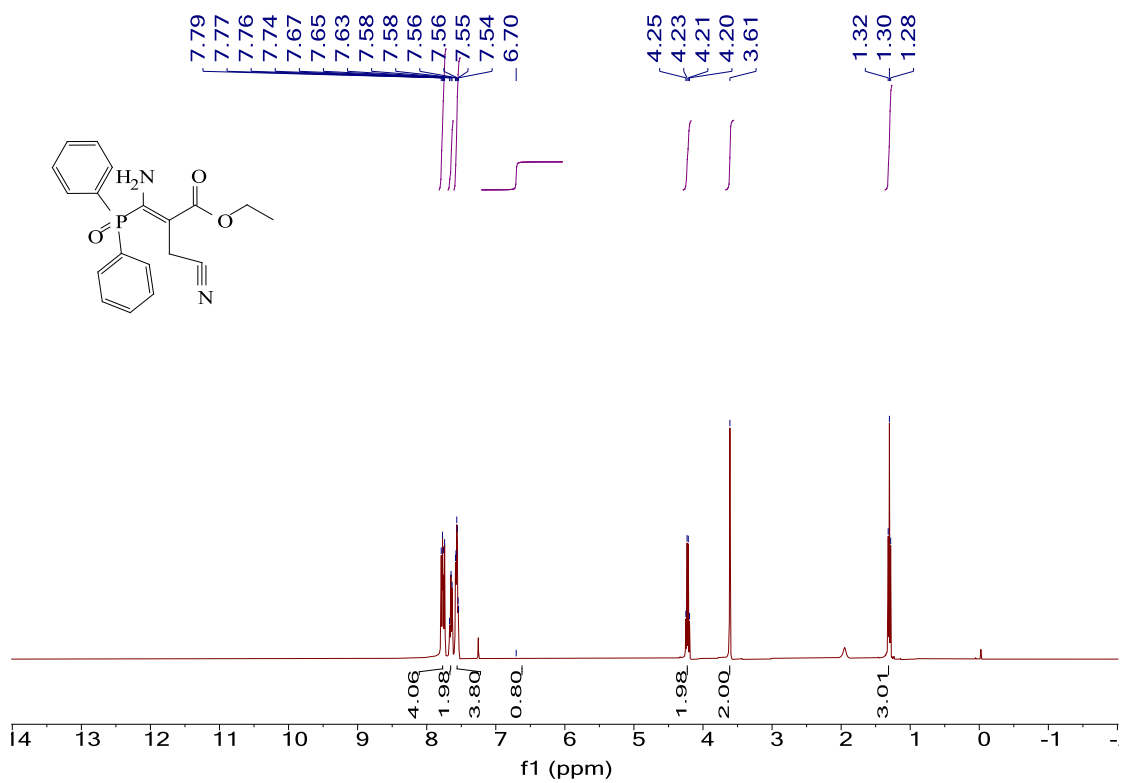

<sup>1</sup>H NMR (400 MHz, DMSO-d<sub>6</sub>)

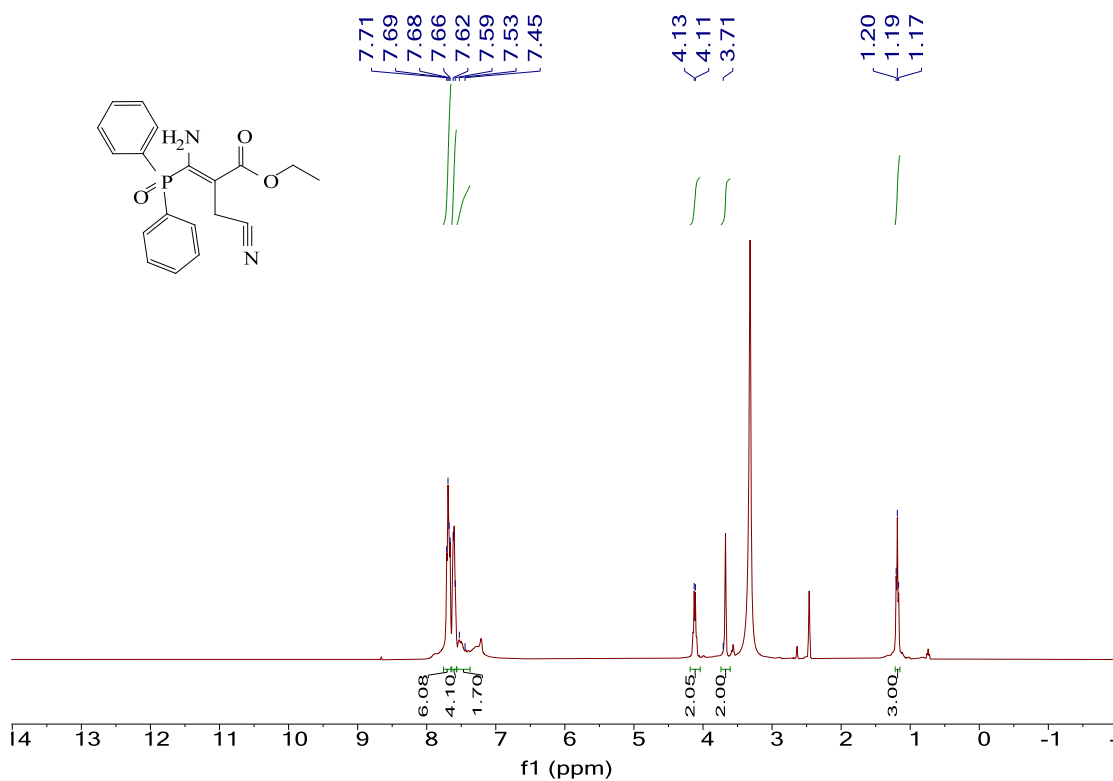

<sup>13</sup>C NMR (101 MHz, CDCl<sub>3</sub>)

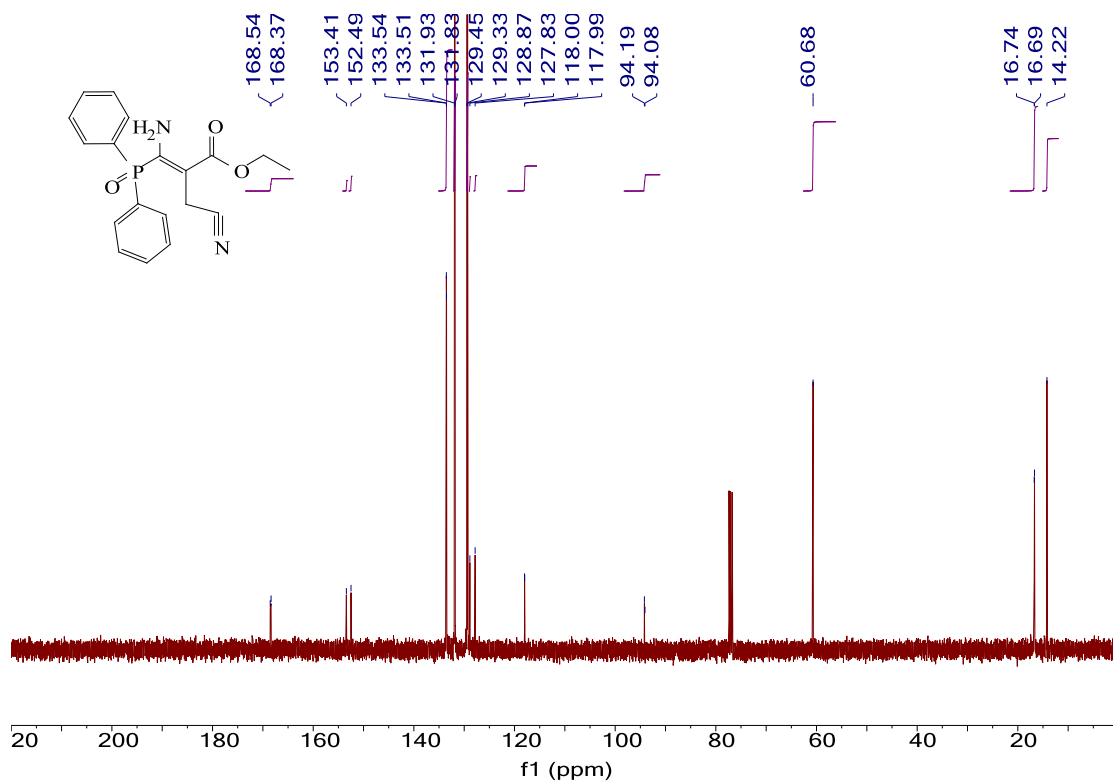

$^{31}\text{P}$  NMR (162 MHz,  $\text{CDCl}_3$ )

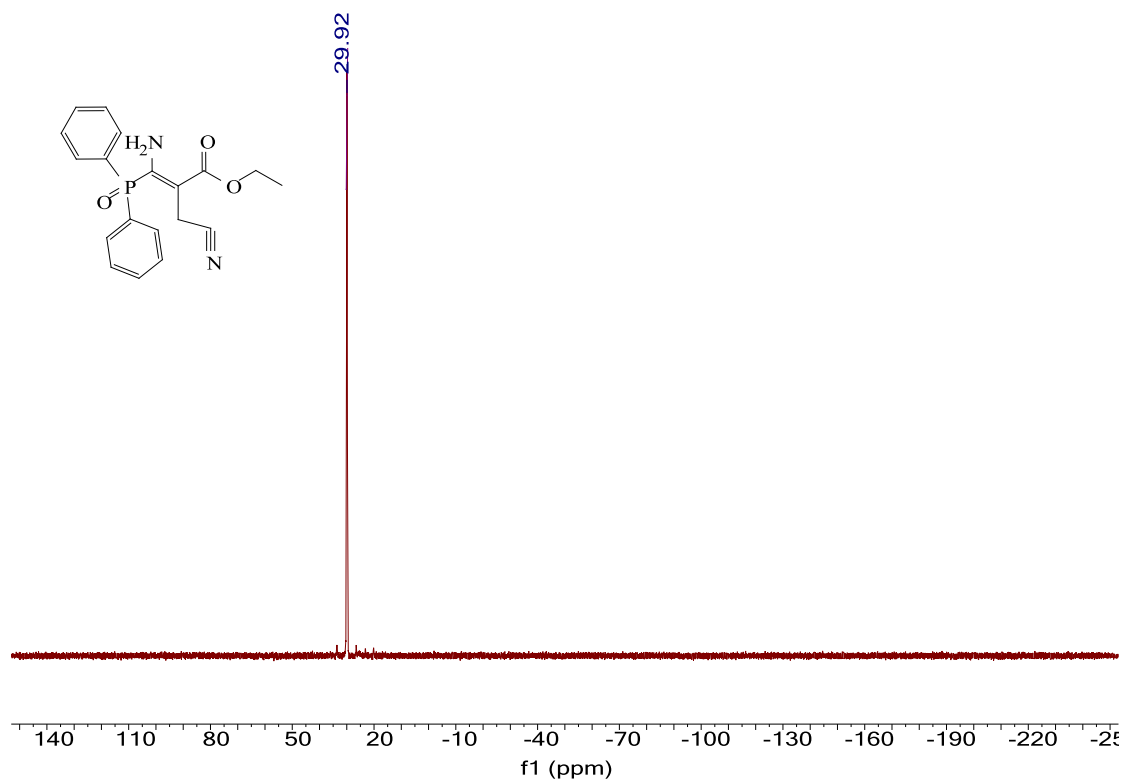

**Amino-3-(diphenylphosphoryl)-1-phenylprop-2-en-1-one (19)**

$^1\text{H}$  NMR (400 MHz,  $\text{CDCl}_3$ )

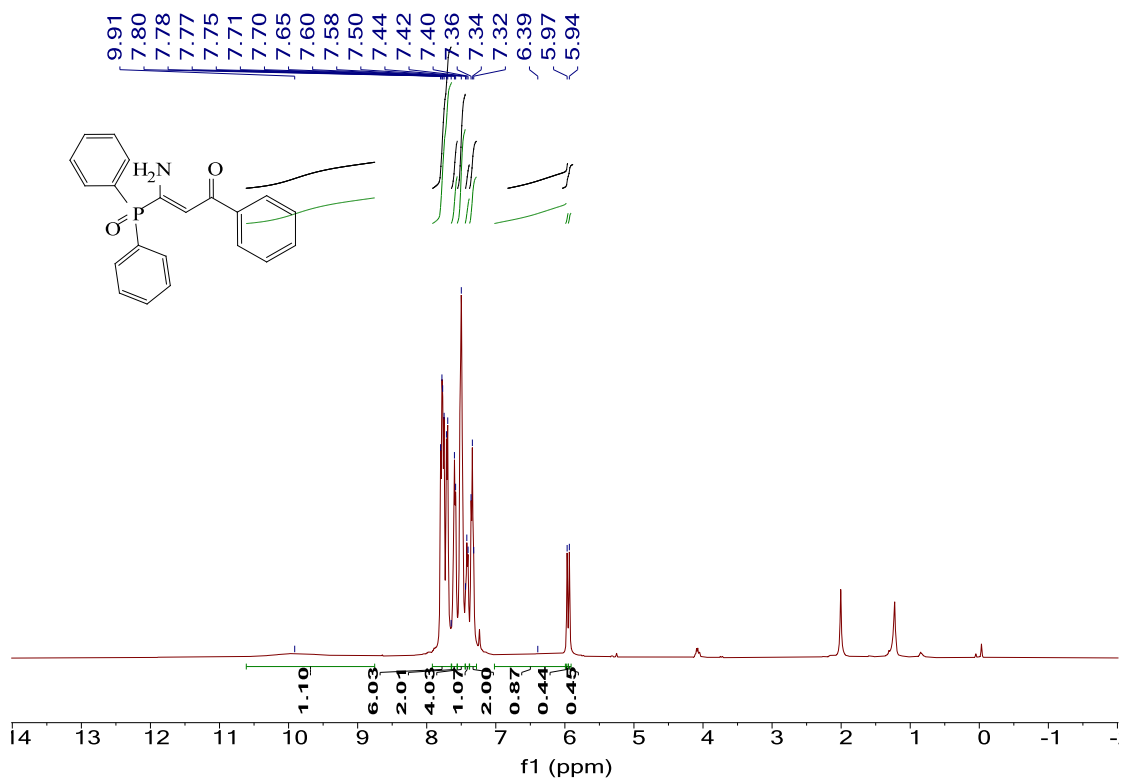

<sup>1</sup>H NMR (400 MHz, DMSO-d<sub>6</sub>)

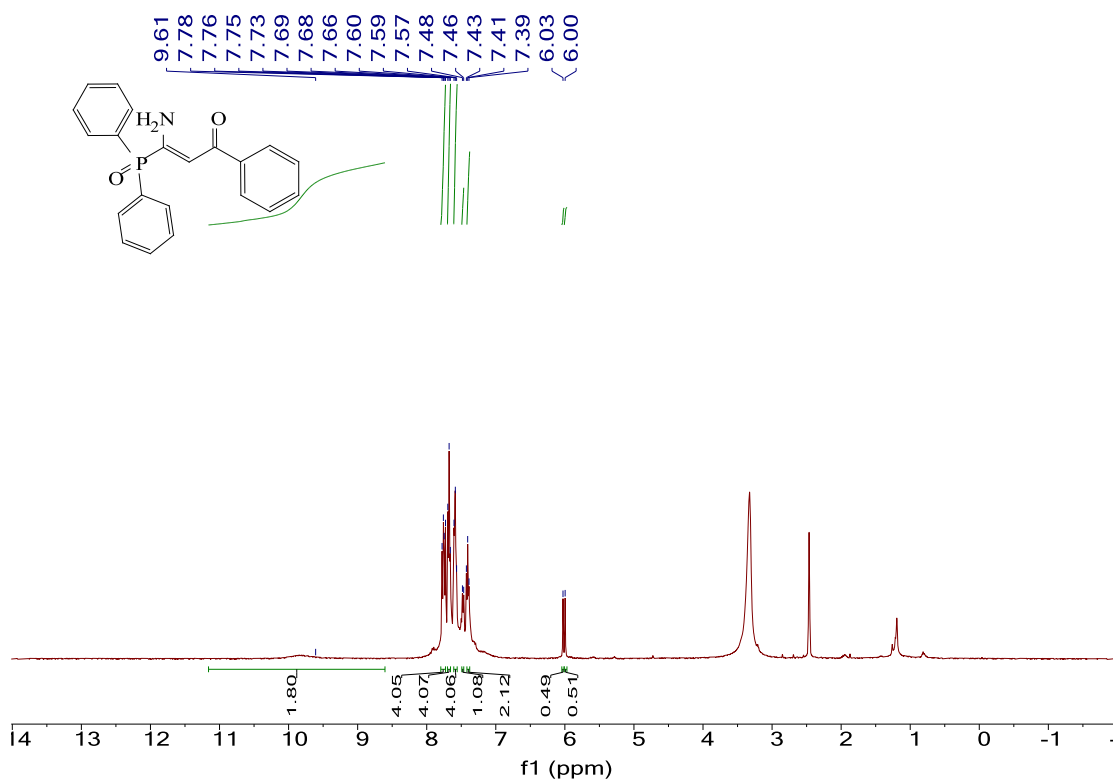

<sup>13</sup>C NMR (101 MHz, CDCl<sub>3</sub>)

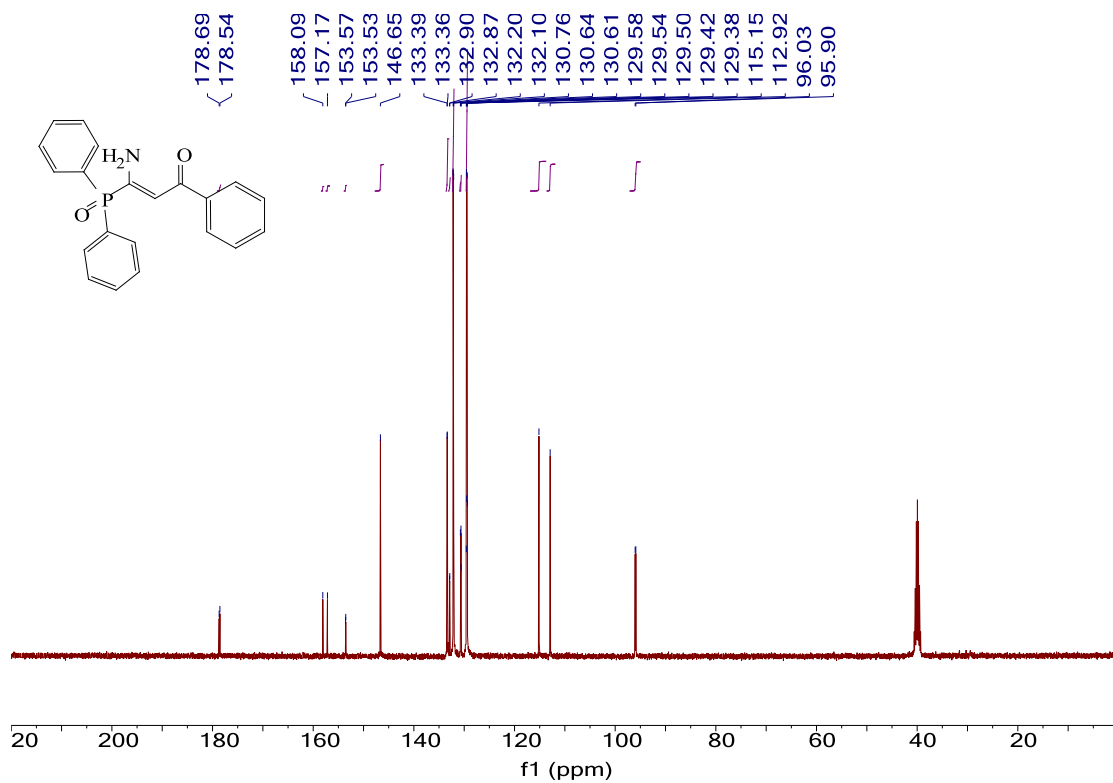

<sup>31</sup>P NMR (162 MHz, CDCl<sub>3</sub>)

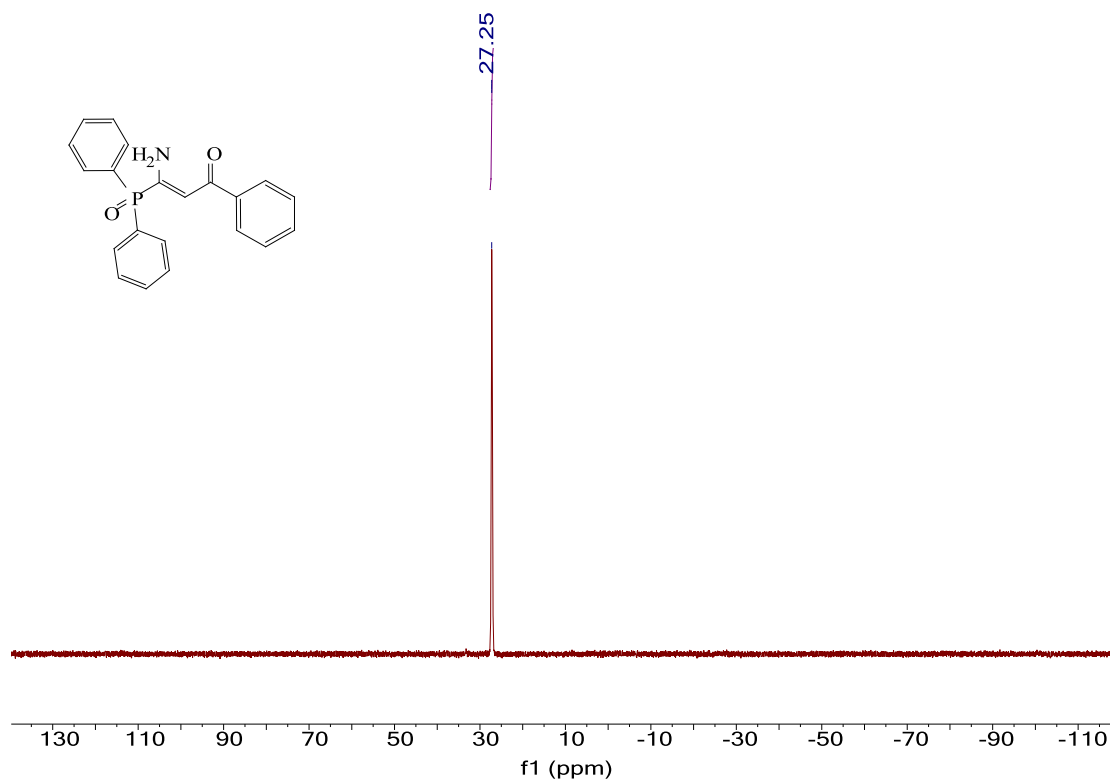

**3-Amino-1-(4-chlorophenyl)-3-(diphenylphosphoryl) prop-2-en-1-one (20)**

<sup>1</sup>H NMR (400 MHz, CDCl<sub>3</sub>)

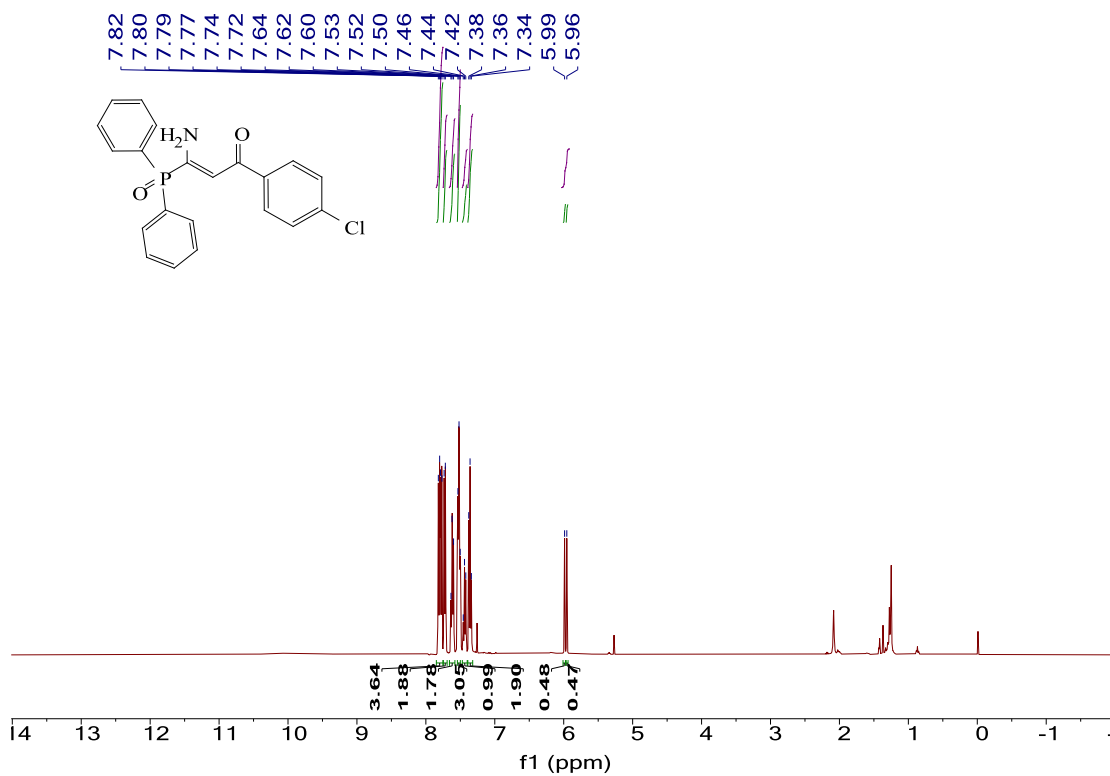

<sup>13</sup>C NMR (101 MHz, CDCl<sub>3</sub>)

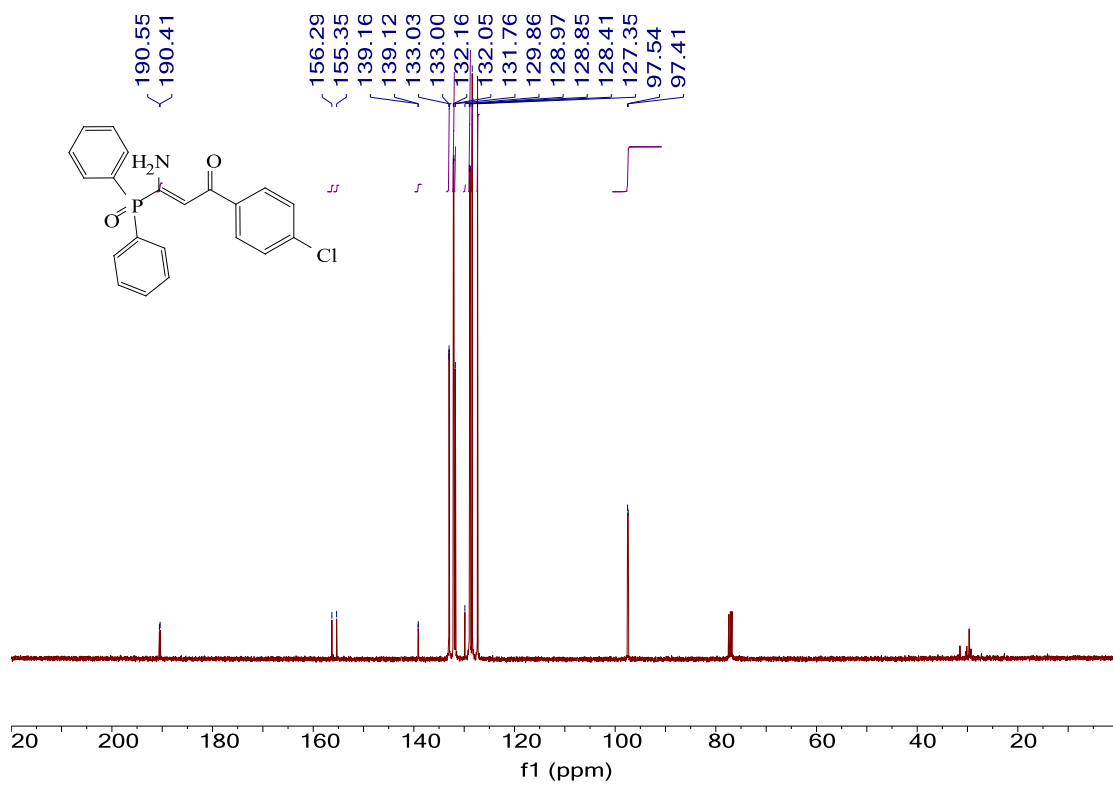

<sup>31</sup>P NMR (162 MHz, CDCl<sub>3</sub>)

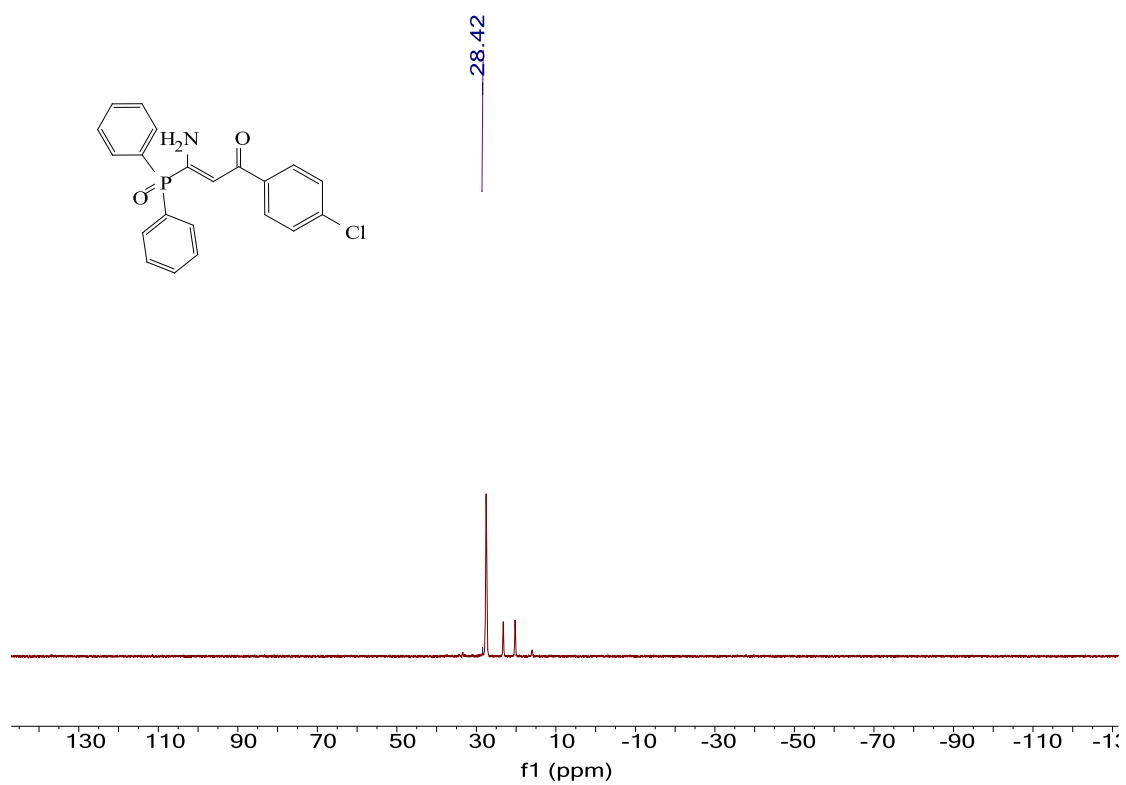

### 3-Amino-3-(diphenylphosphoryl)-1-(furan-2-yl)prop-2-en-1-one (21)

$^1\text{H}$  NMR (400 MHz,  $\text{CDCl}_3$ )

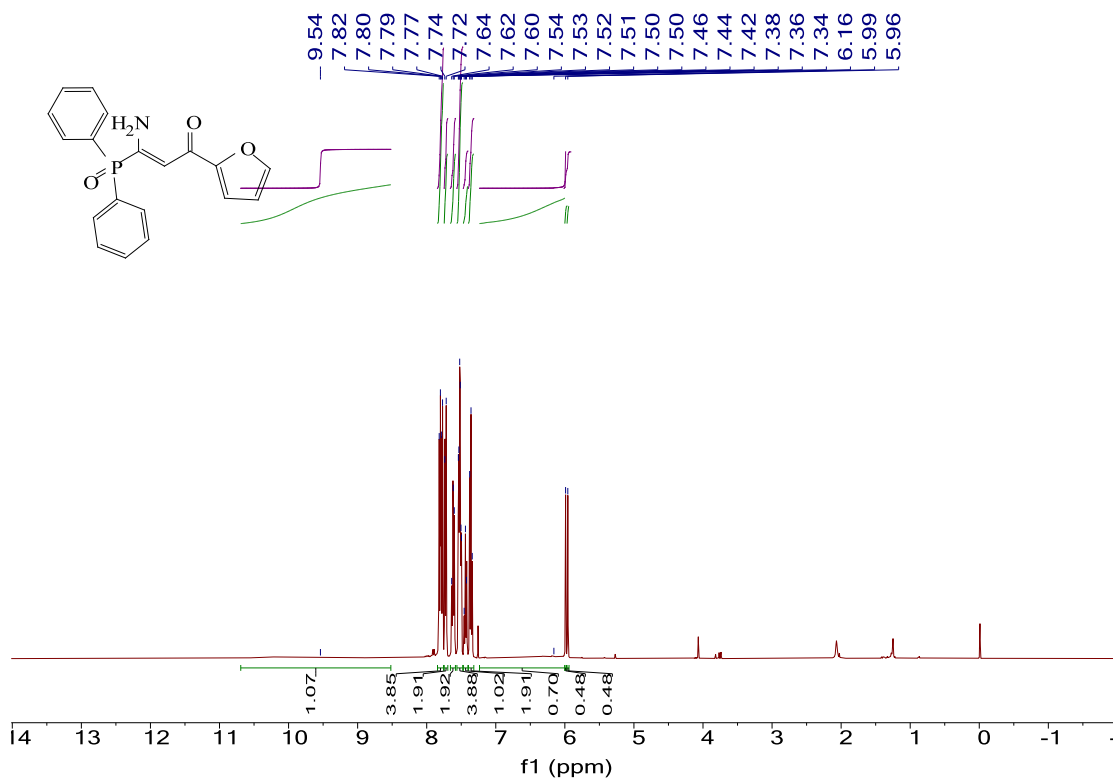

$^{13}\text{C}$  NMR (101 MHz,  $\text{CDCl}_3$ )

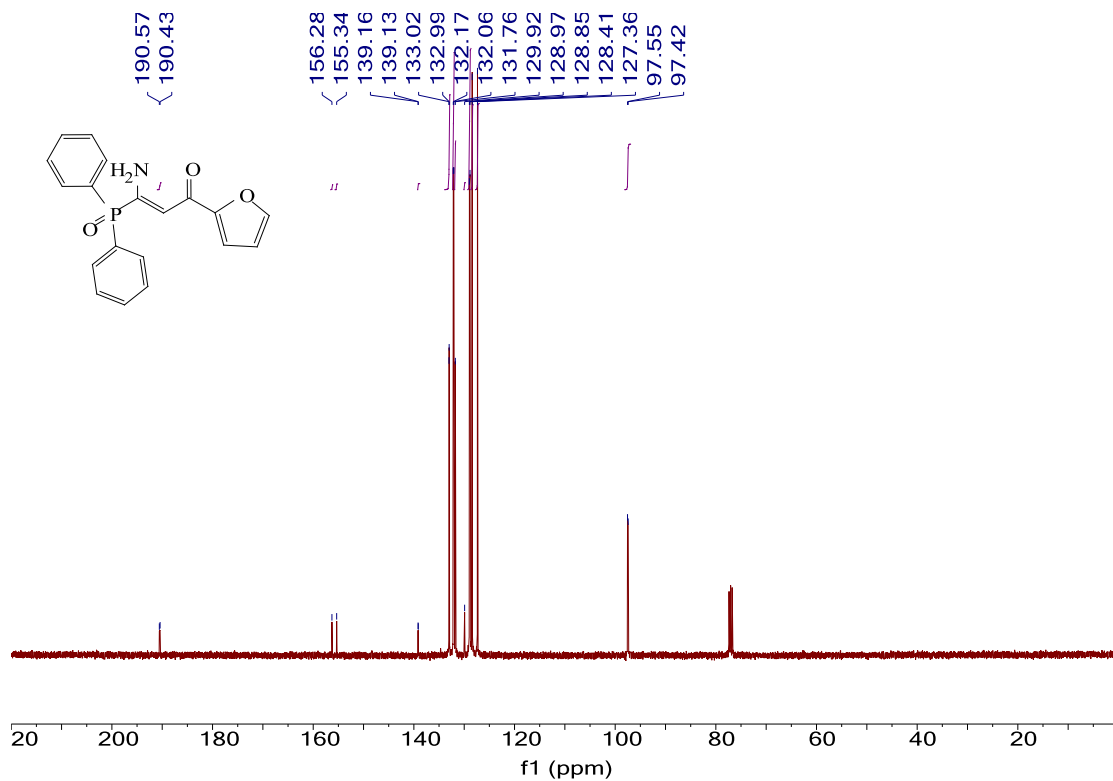

$^{31}\text{P}$  NMR (162 MHz,  $\text{CDCl}_3$ )

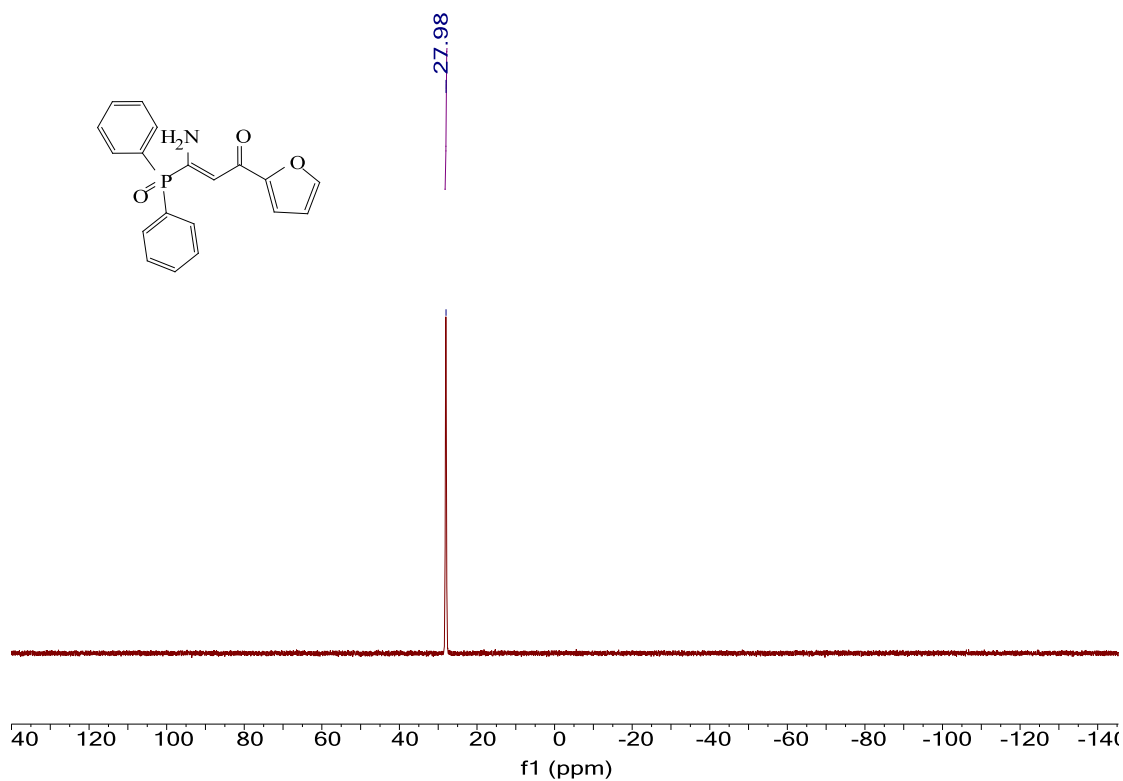

**1-Amino-1-(diphenylphosphoryl)-4,4-dimethylpent-1-en-3-one (22)**

$^1\text{H}$  NMR (400 MHz,  $\text{CDCl}_3$ )

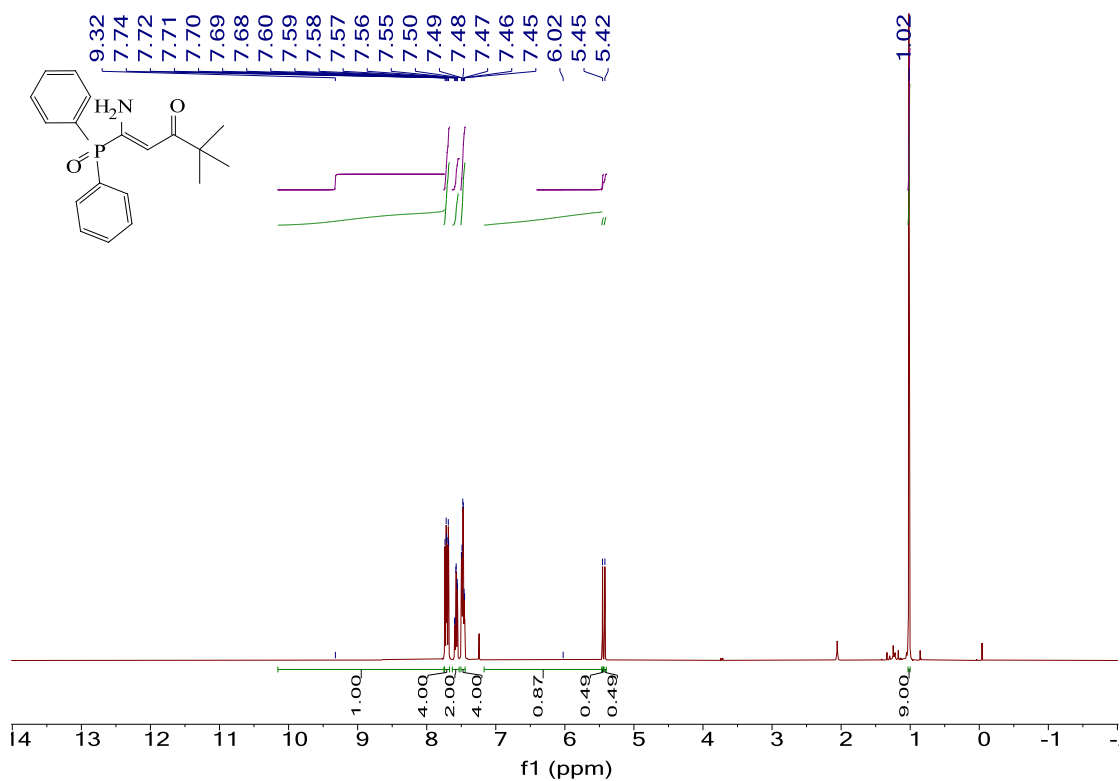



$^1\text{H}$  NMR (400 MHz,  $\text{DMSO-}d_6$ )

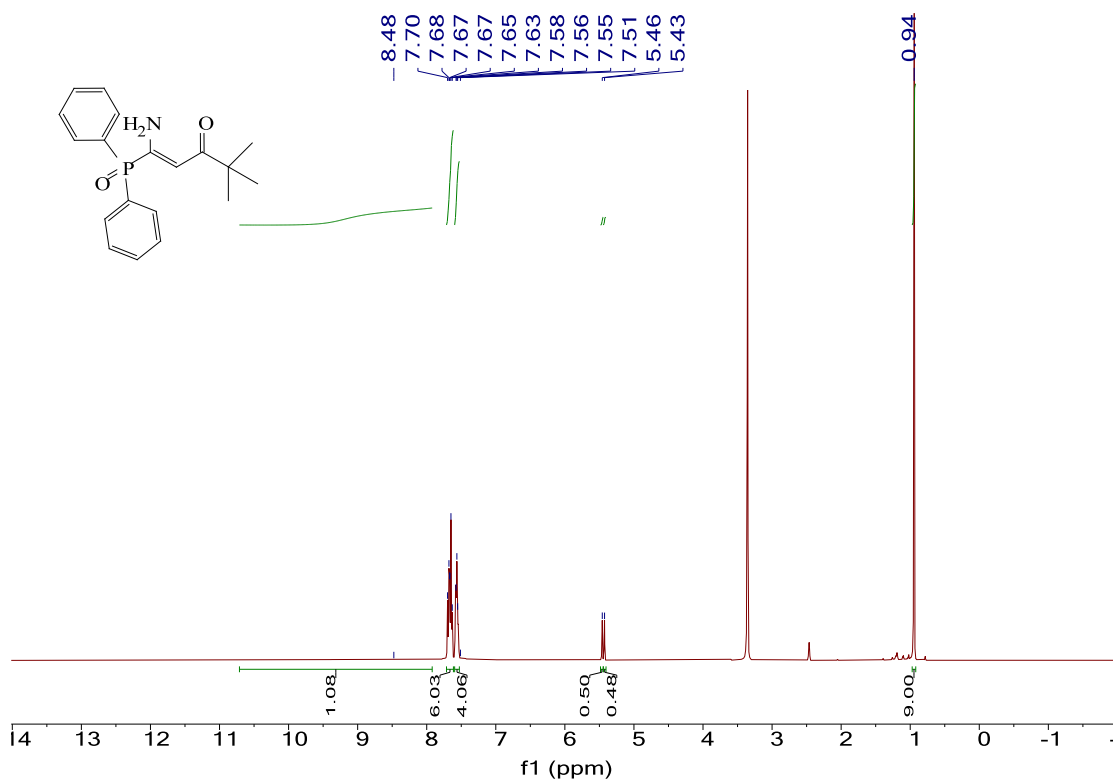

$^{13}\text{C}$  NMR (101 MHz,  $\text{CDCl}_3$ )

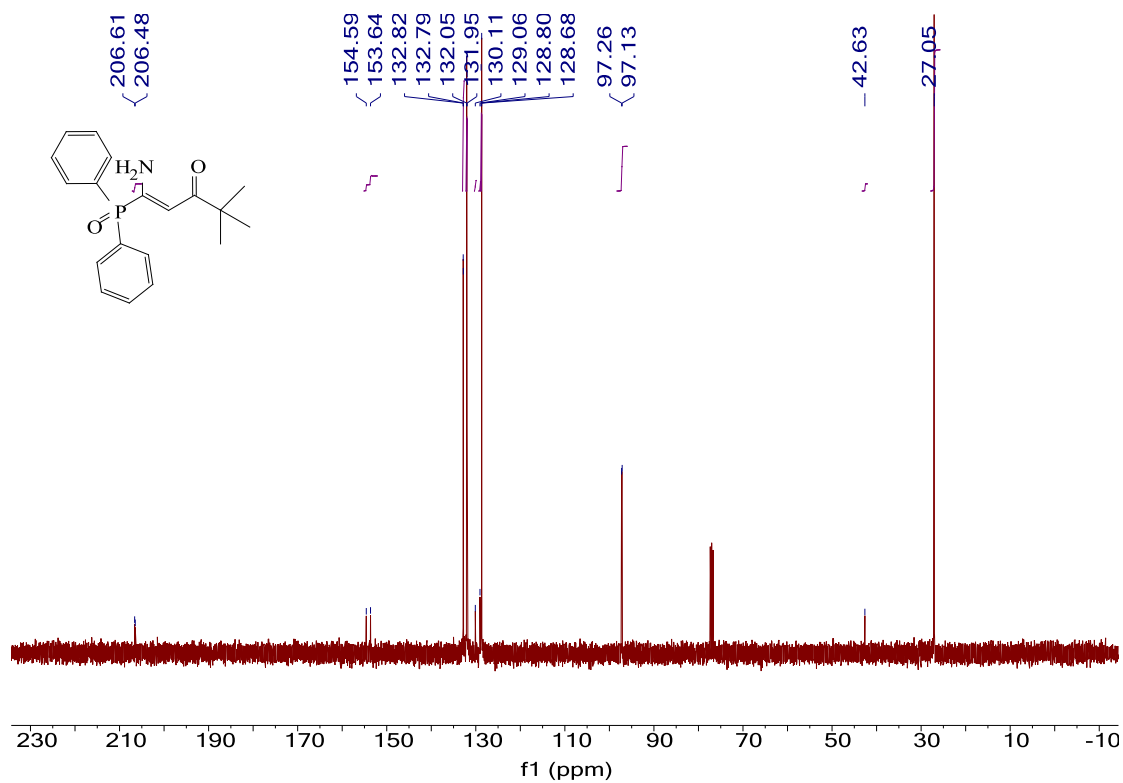

$^{31}\text{P}$  NMR (162 MHz,  $\text{CDCl}_3$ )

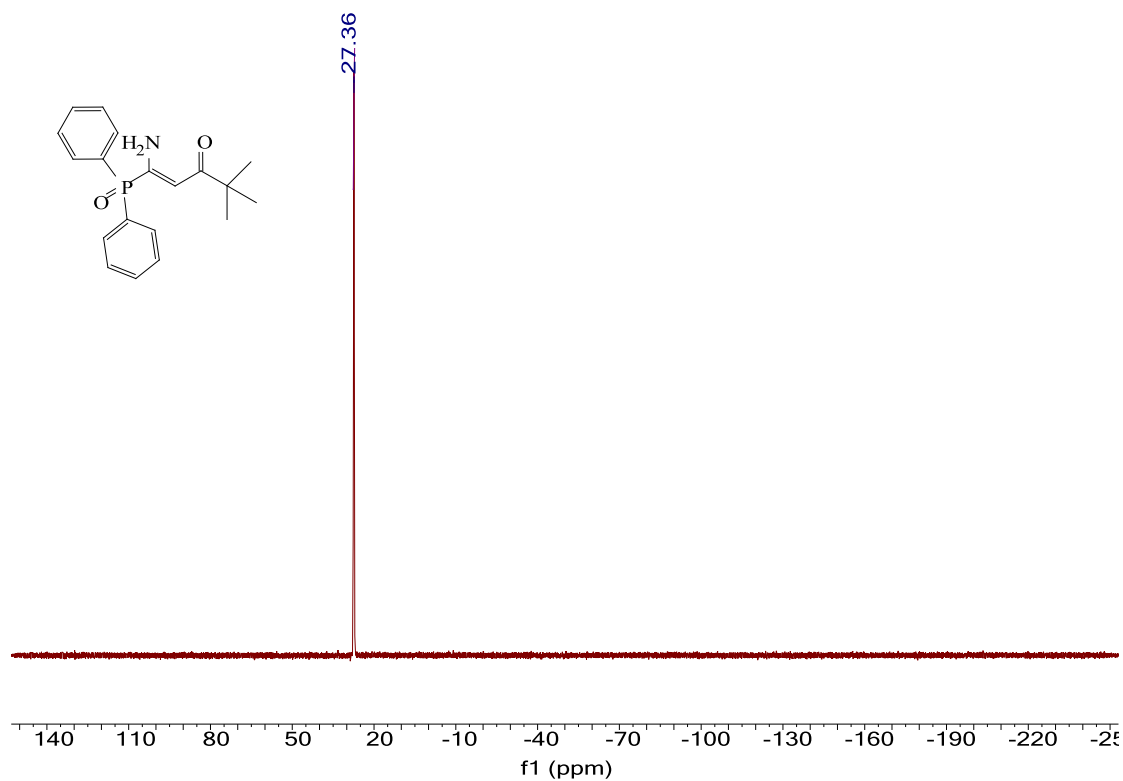

**3-Amino-3-(diphenylphosphoryl)-N-methylacrylamide (23).**

$^1\text{H}$  NMR (400 MHz,  $\text{CDCl}_3$ )

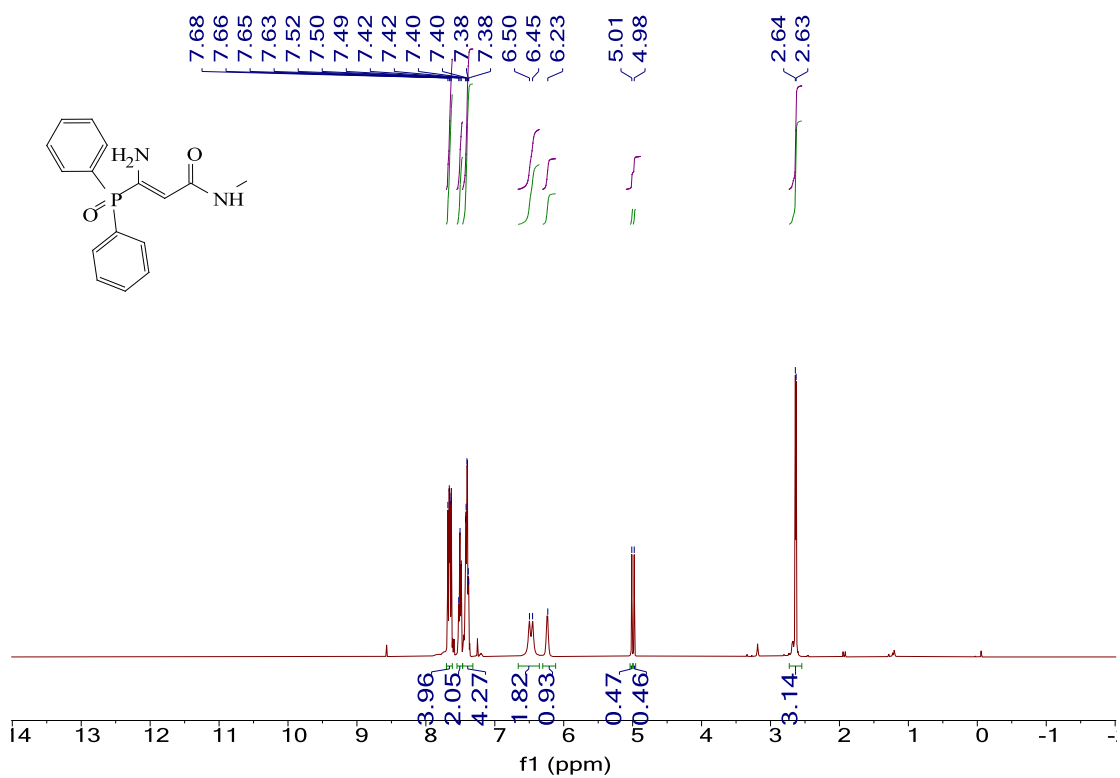

$^{13}\text{C}$  NMR (101 MHz,  $\text{CDCl}_3$ )

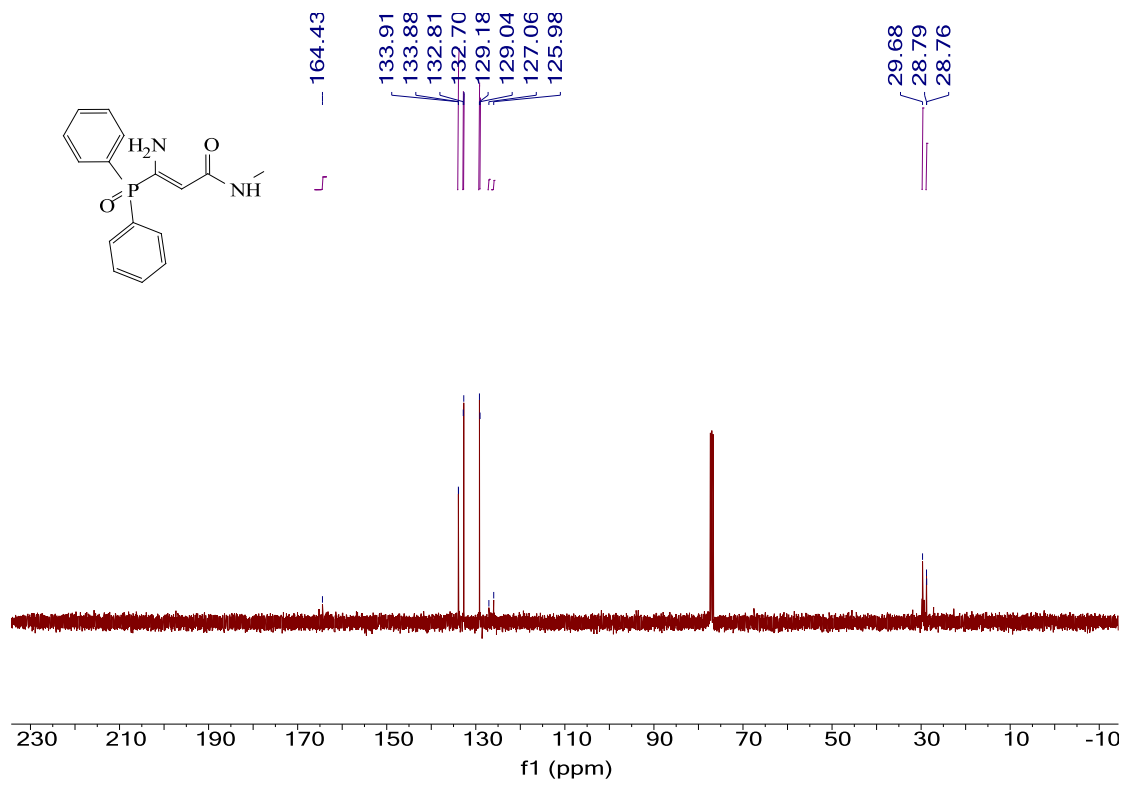

$^{31}\text{P}$  NMR (162 MHz,  $\text{CDCl}_3$ )

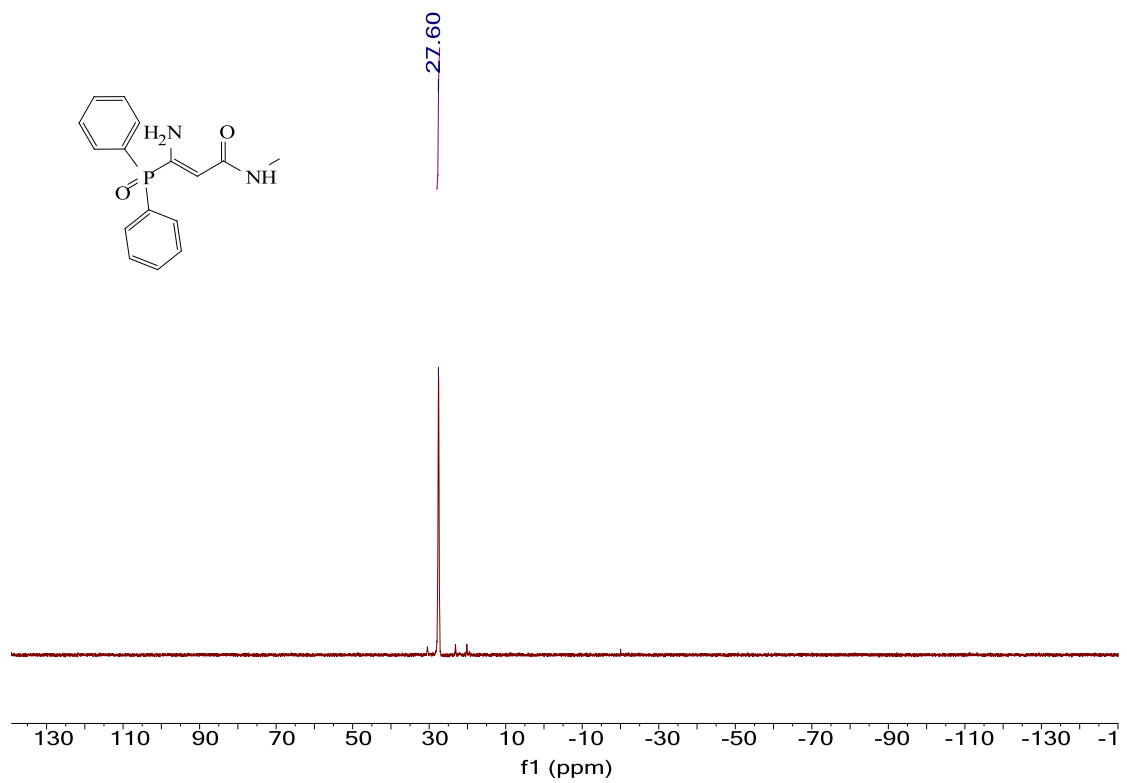

### 3-Amino-3-(diphenylphosphoryl)-N,N-dimethylacrylamide (24)

<sup>1</sup>H NMR (400 MHz, CDCl<sub>3</sub>)

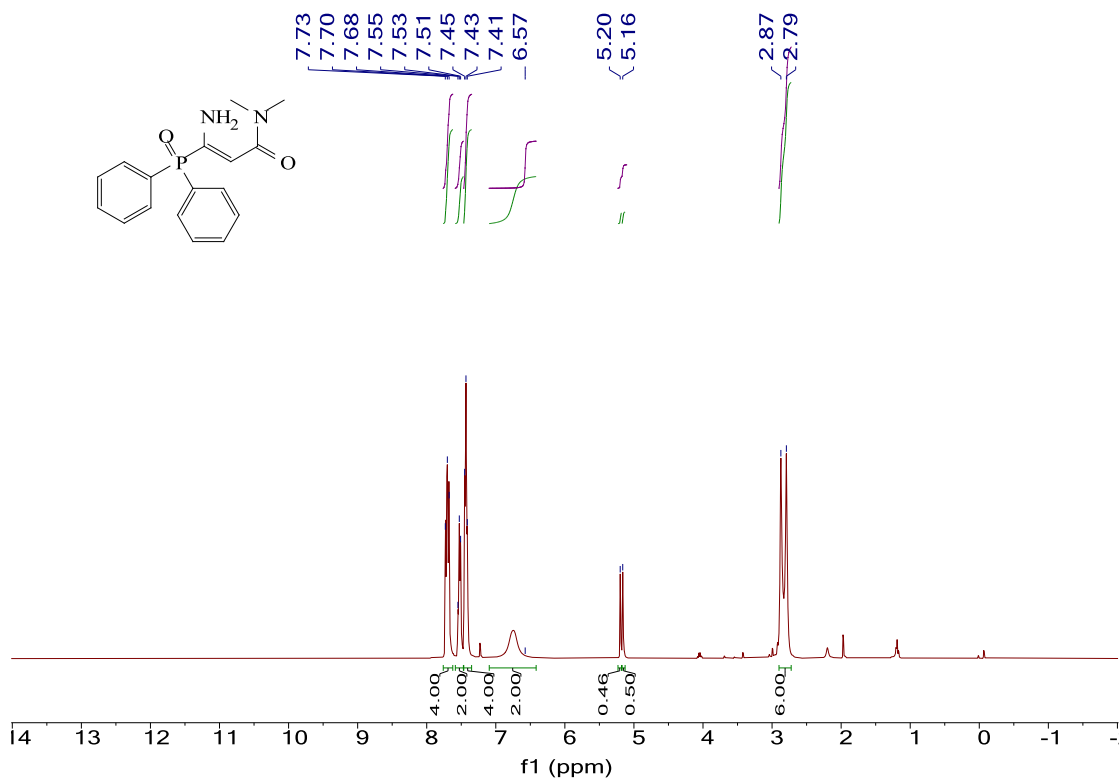

<sup>13</sup>C NMR (101 MHz, CDCl<sub>3</sub>)

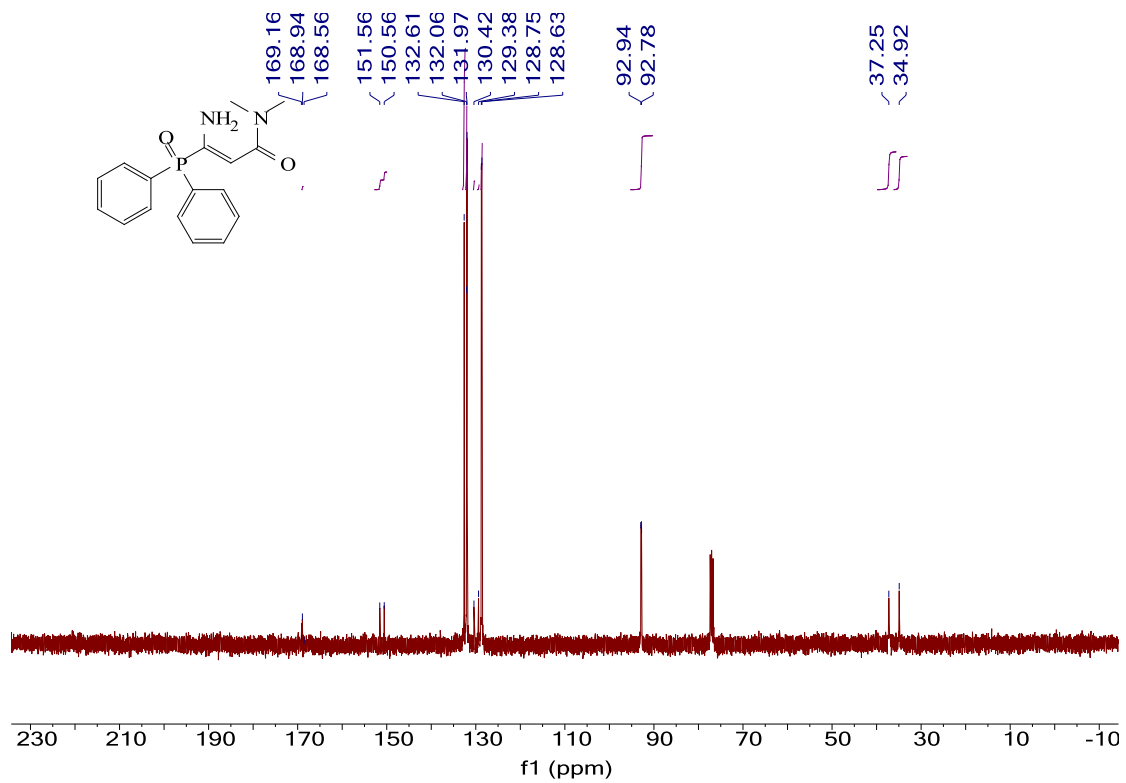

$^{31}\text{P}$  NMR (162 MHz,  $\text{CDCl}_3$ )

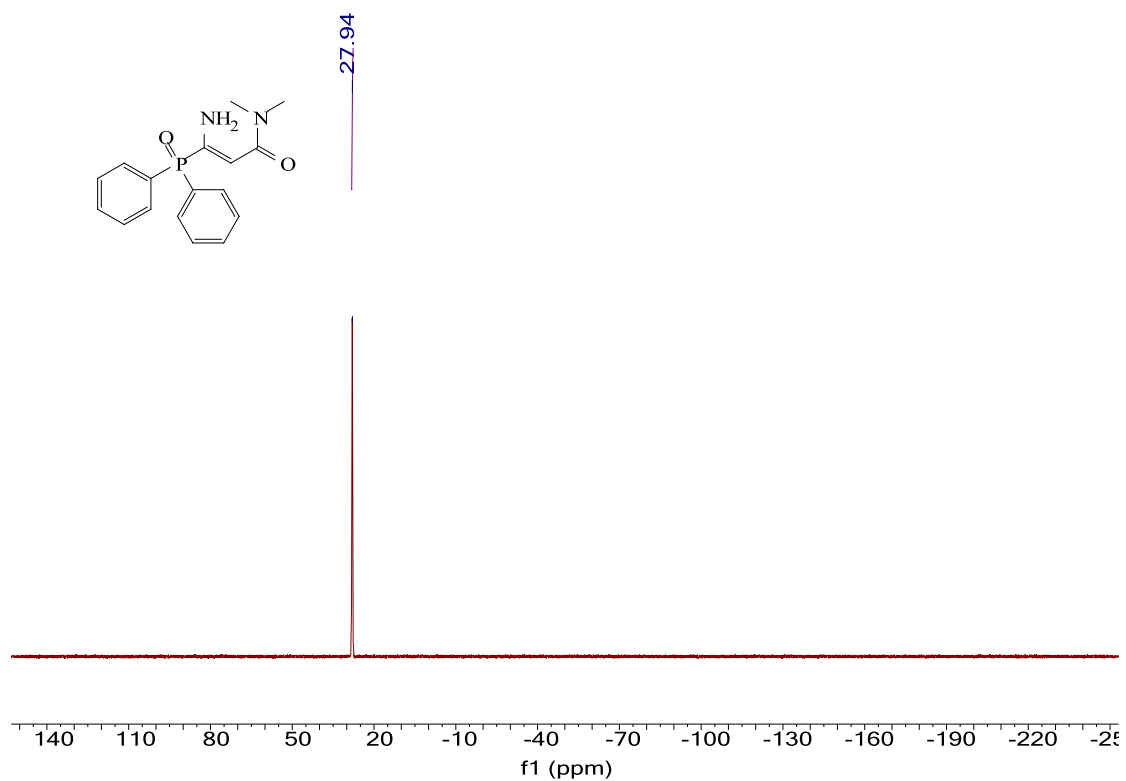

**3-Amino-3-(diphenylphosphoryl)-1-(piperidin-1-yl)prop-2-en-1-one (25)**

$^1\text{H}$  NMR (400 MHz,  $\text{CDCl}_3$ )

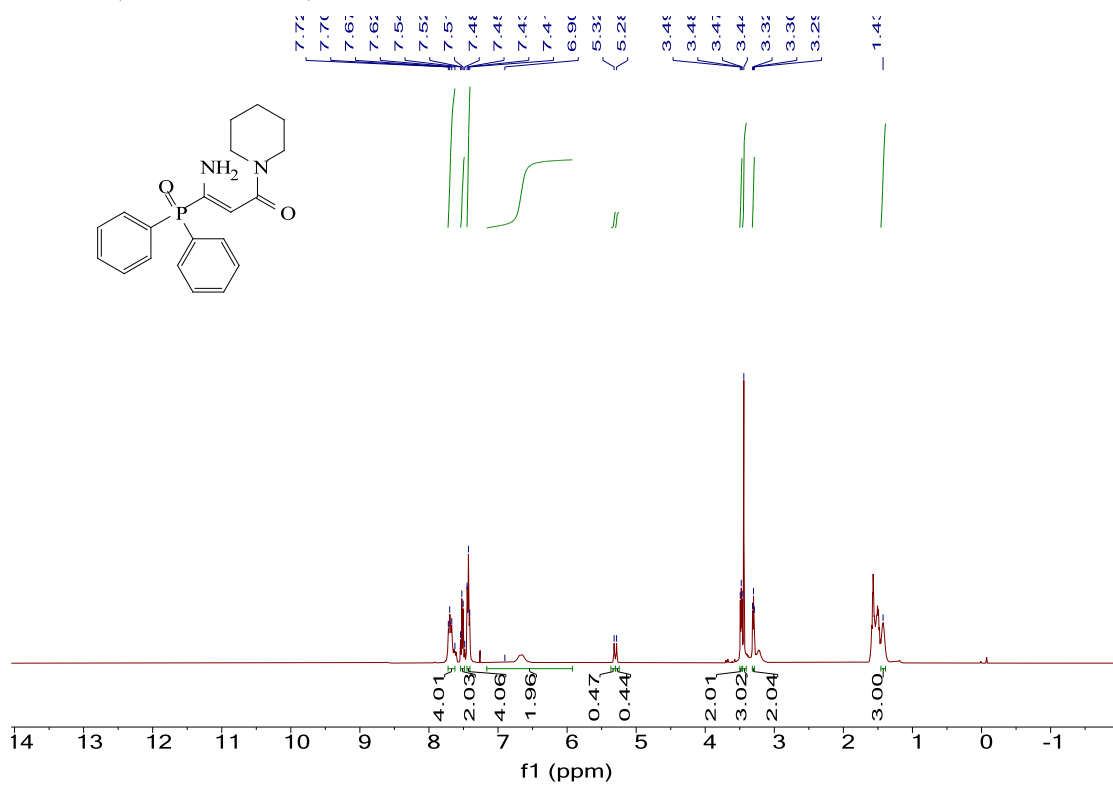

<sup>13</sup>C NMR (101 MHz, CDCl<sub>3</sub>)

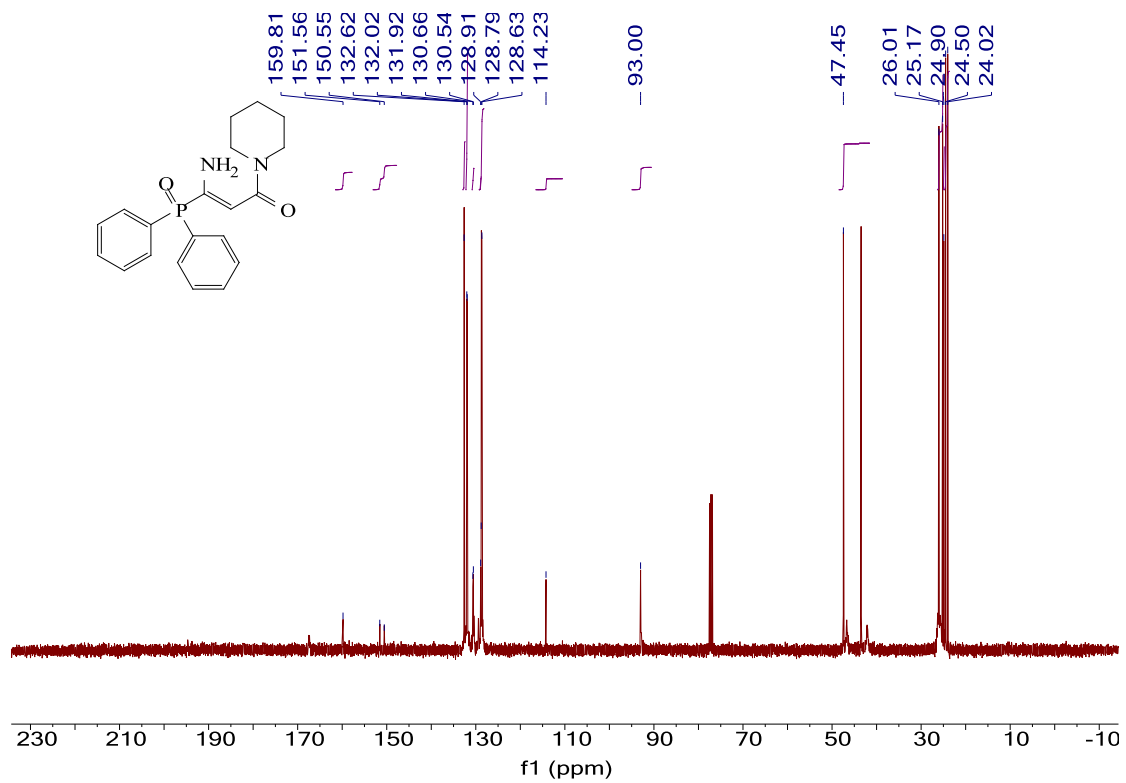

<sup>31</sup>P NMR (162 MHz, CDCl<sub>3</sub>)

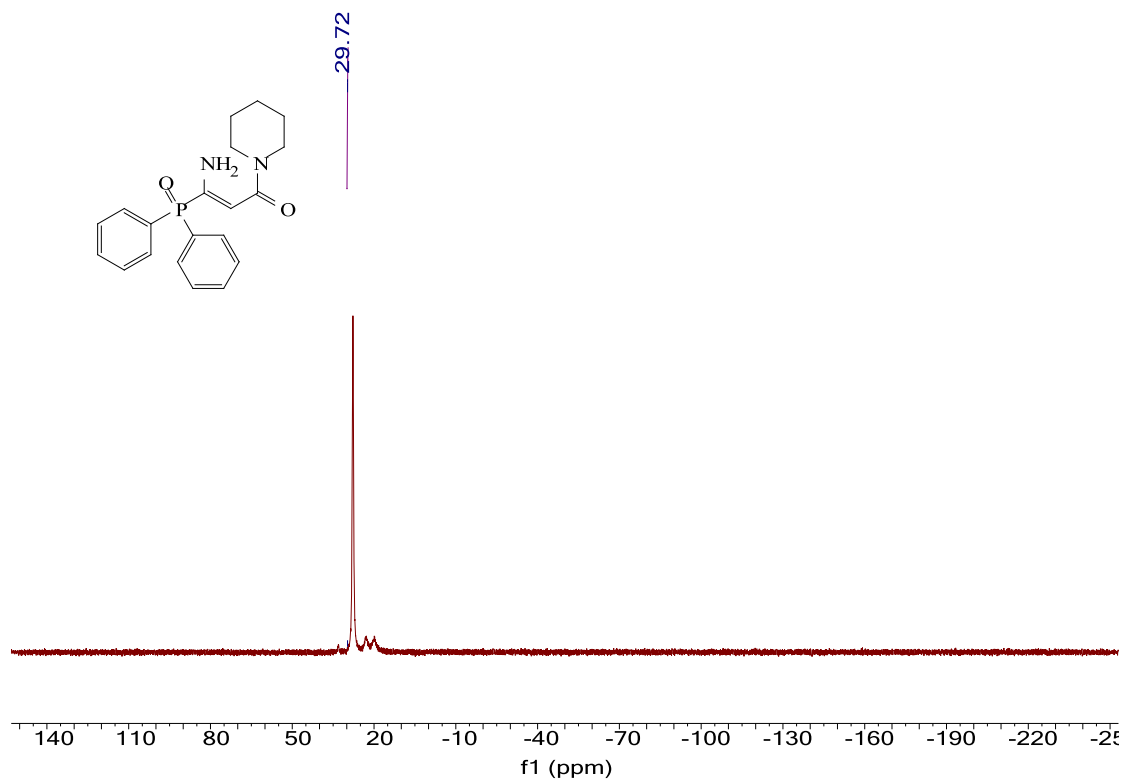

### 3-Amino-3-(diphenylphosphoryl)-N-phenylacrylamide (26).

$^1\text{H}$  NMR (400 MHz,  $\text{DMSO-}d_6$ )

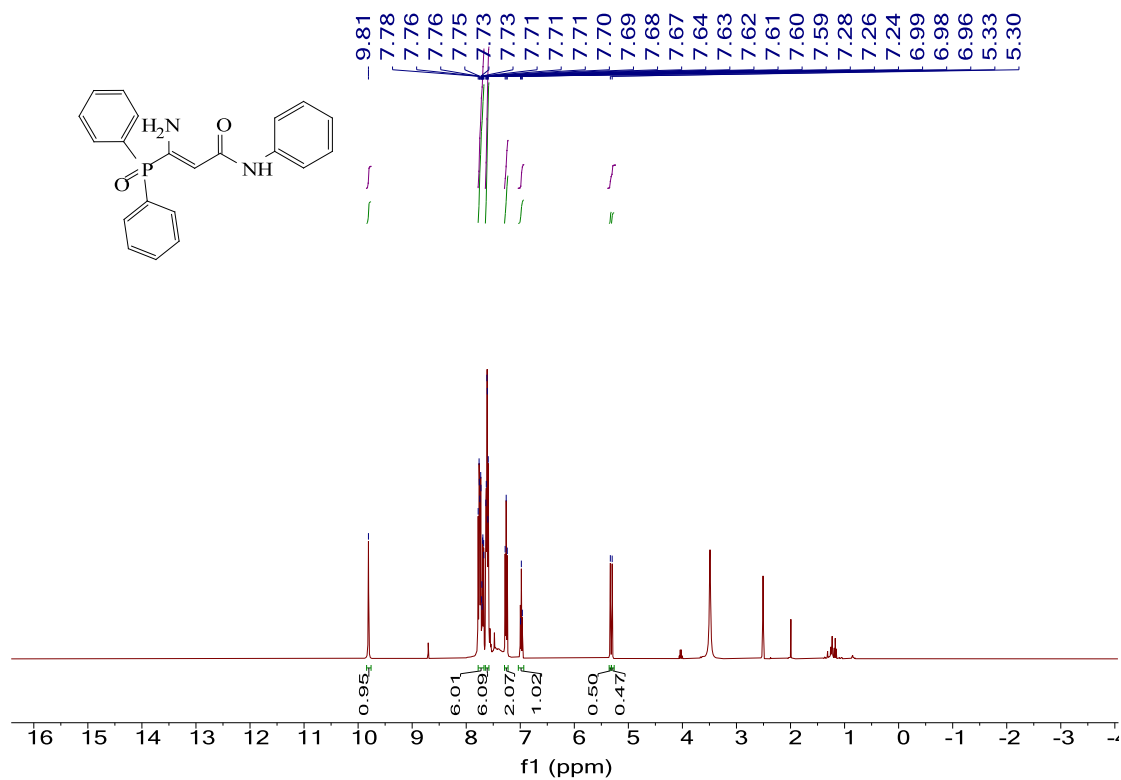

$^{13}\text{C}$  NMR (101 MHz,  $\text{DMSO-}d_6$ )

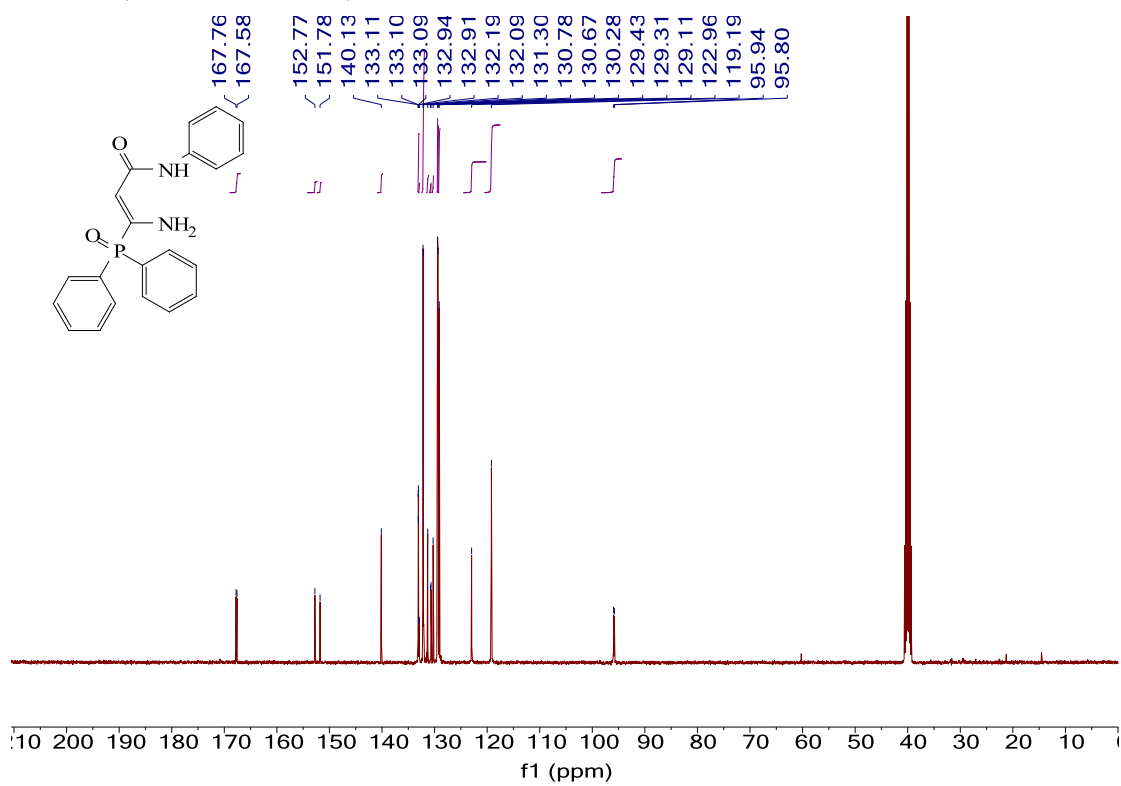

$^{31}\text{P}$  NMR (162 MHz,  $\text{DMSO-}d_6$ )

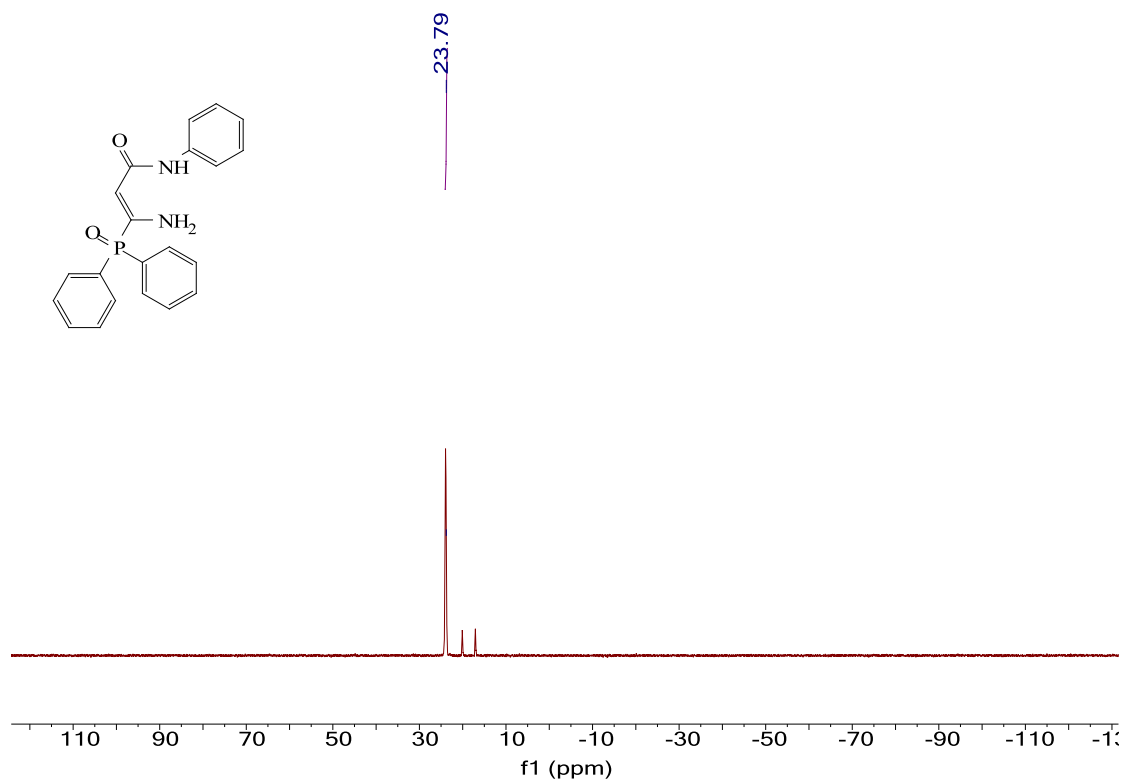

### 3-Amino-3-(diphenylphosphoryl)acrylamide (27)

$^1\text{H}$  NMR (400 MHz,  $\text{CDCl}_3$ )

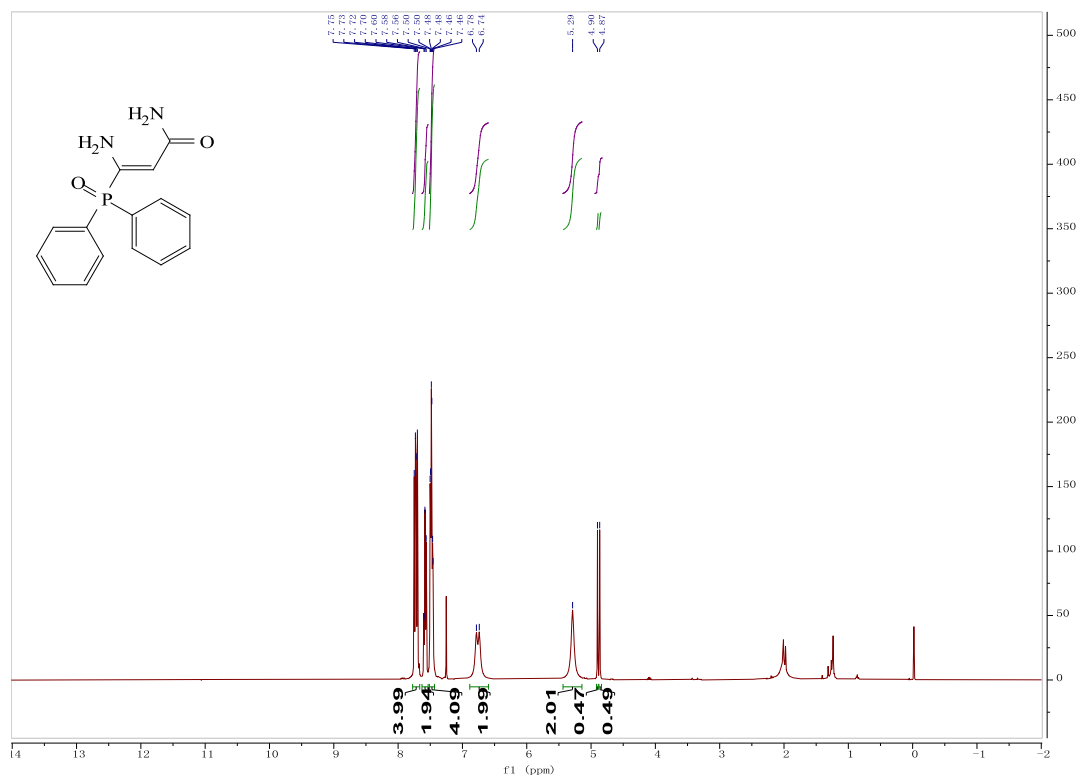



$^{13}\text{C}$  NMR (101 MHz,  $\text{DMSO-}d_6$ )

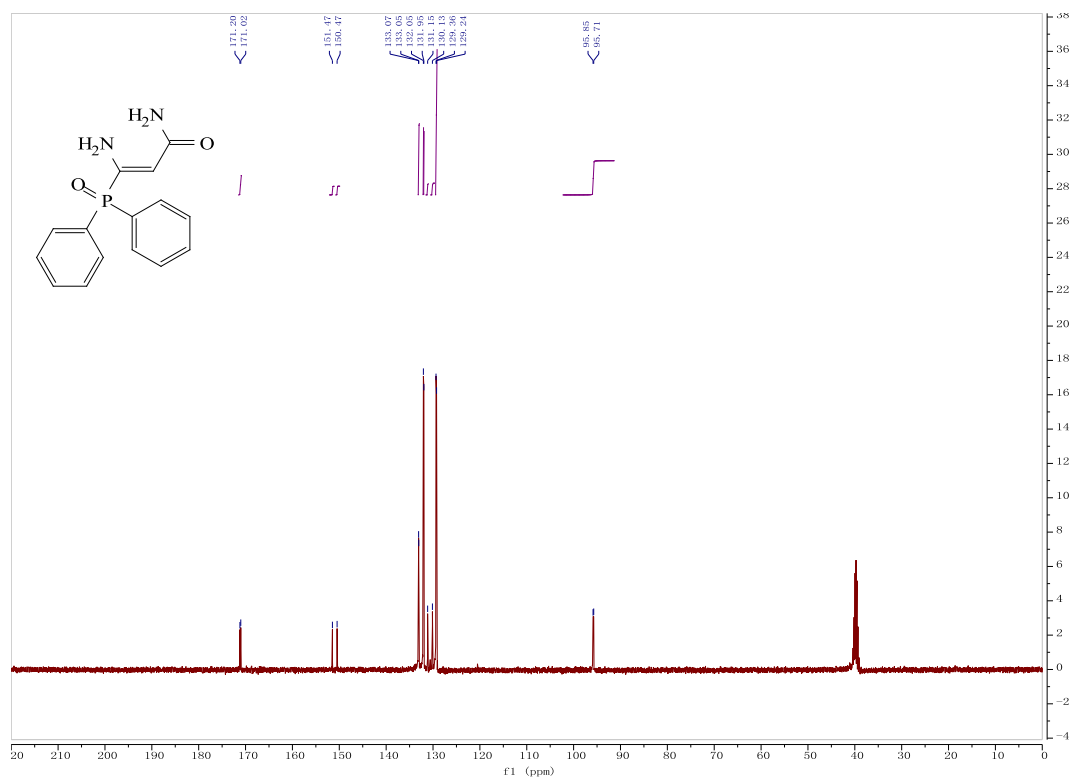

$^{31}\text{P}$  NMR (162 MHz,  $\text{DMSO-}d_6$ )

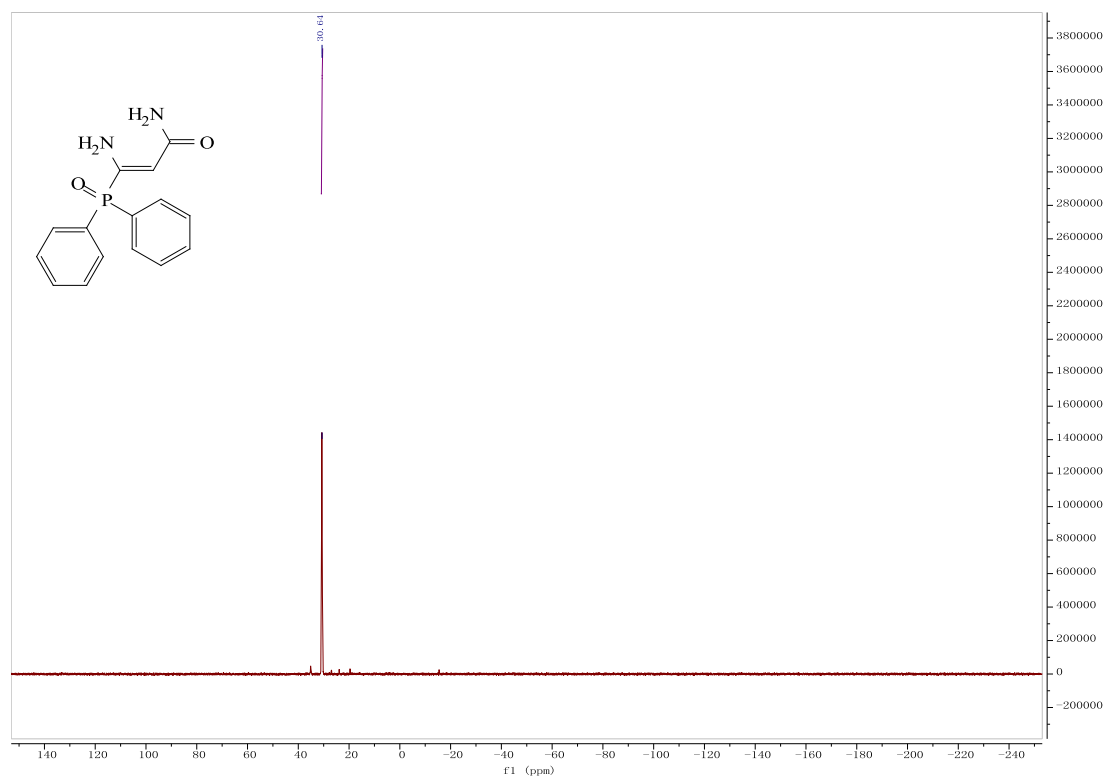

## 2-(Amino(diphenylphosphoryl)methylene)-3-oxobutanenitrile (28)

$^1\text{H}$  NMR (400 MHz,  $\text{CDCl}_3$ )

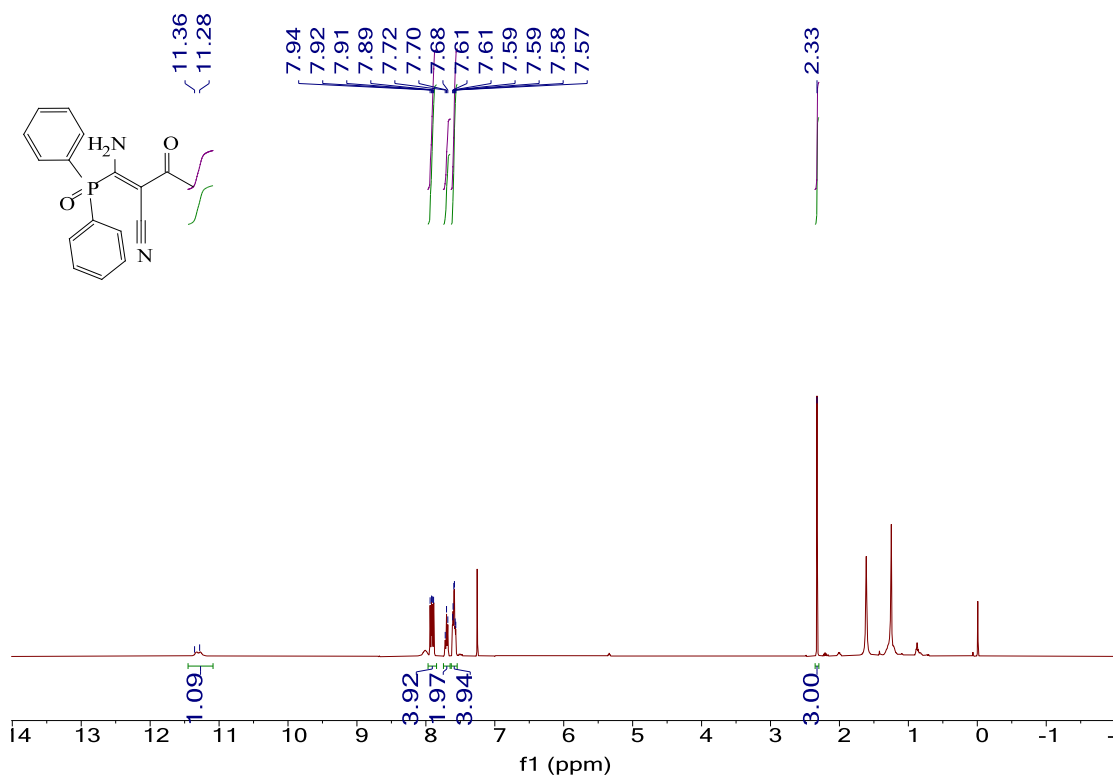

$^1\text{H}$  NMR (400 MHz,  $\text{DMSO}-d_6$ )

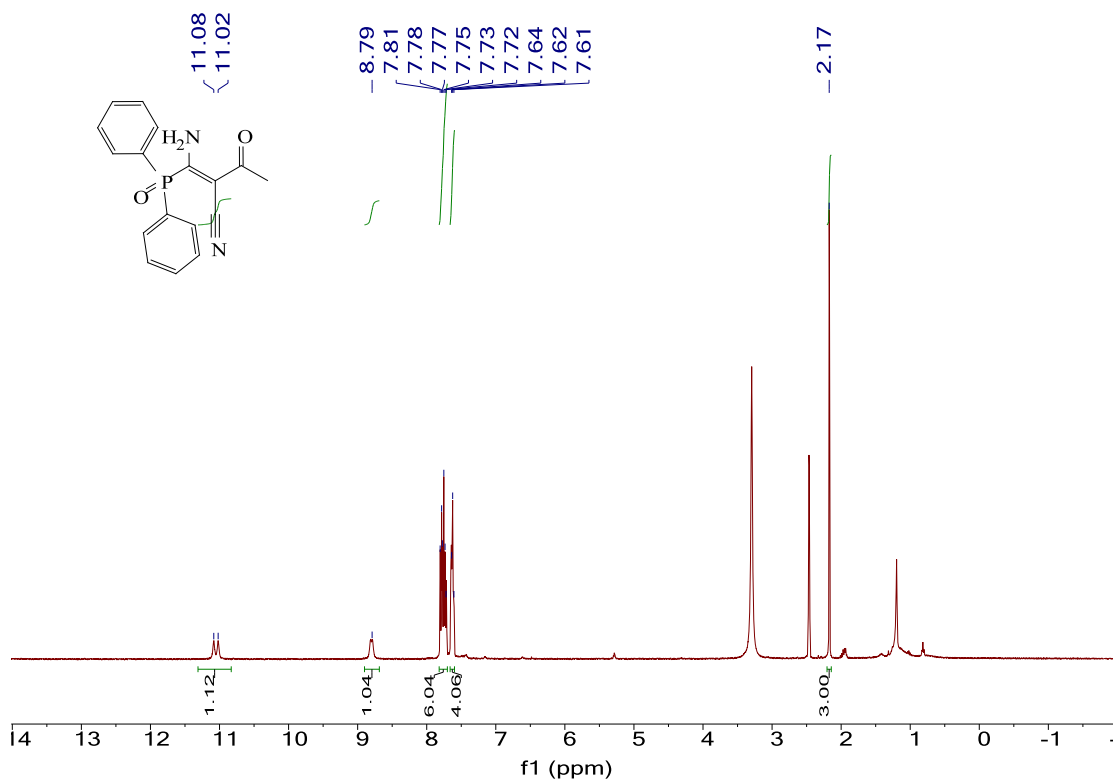

$^{13}\text{C}$  NMR (101 MHz,  $\text{CDCl}_3$ )

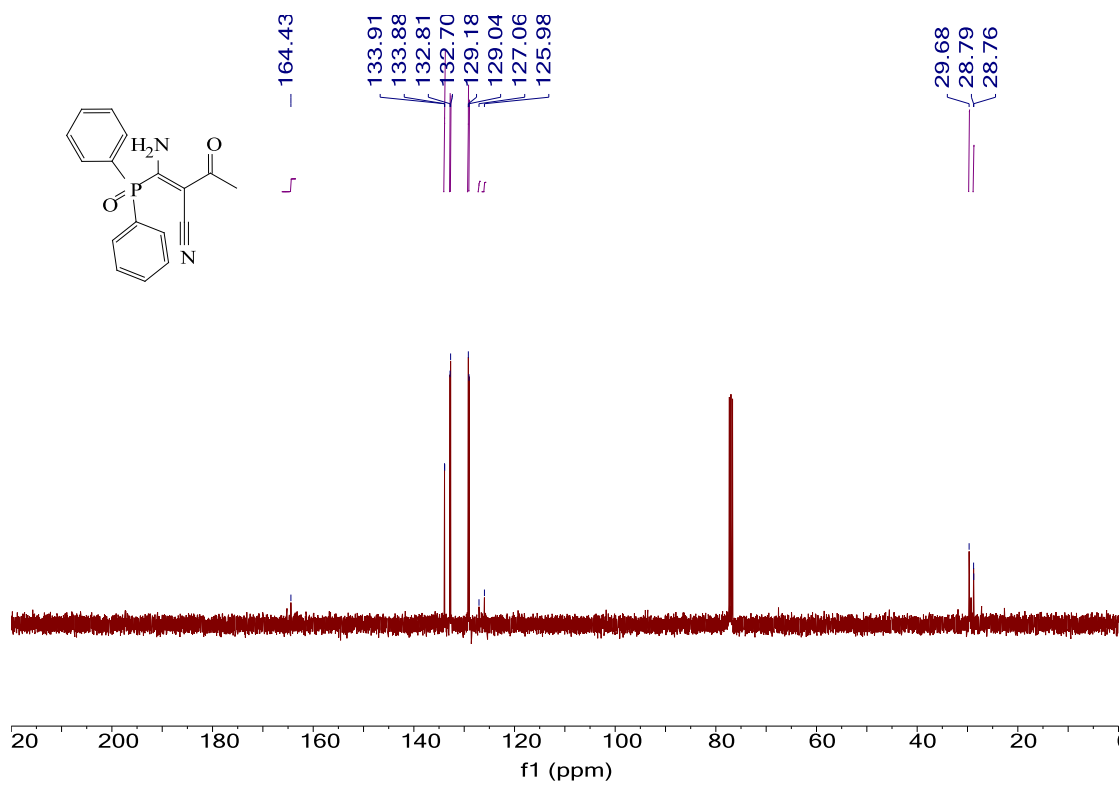

$^{31}\text{P}$  NMR (162 MHz,  $\text{CDCl}_3$ )

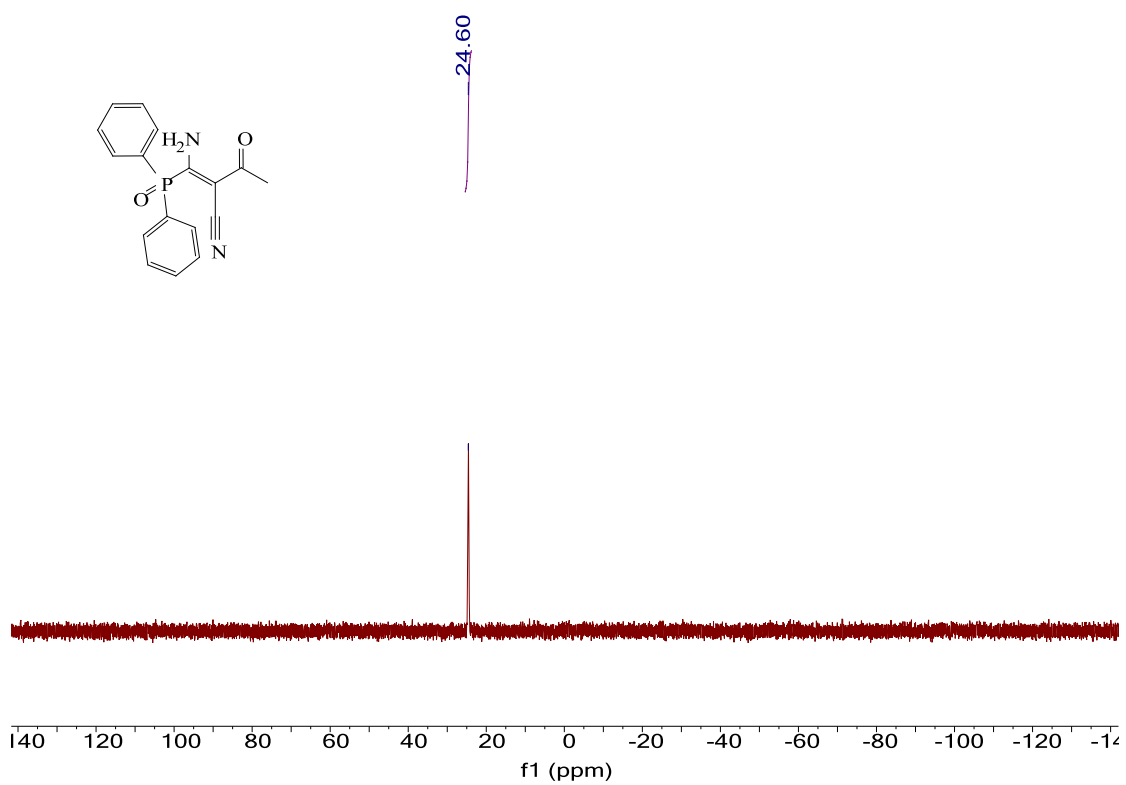

# Amino-2-(phenylsulfonyl)vinyl)diphenylphosphine oxide (29)

$^1\text{H}$  NMR (400 MHz,  $\text{CDCl}_3$ )

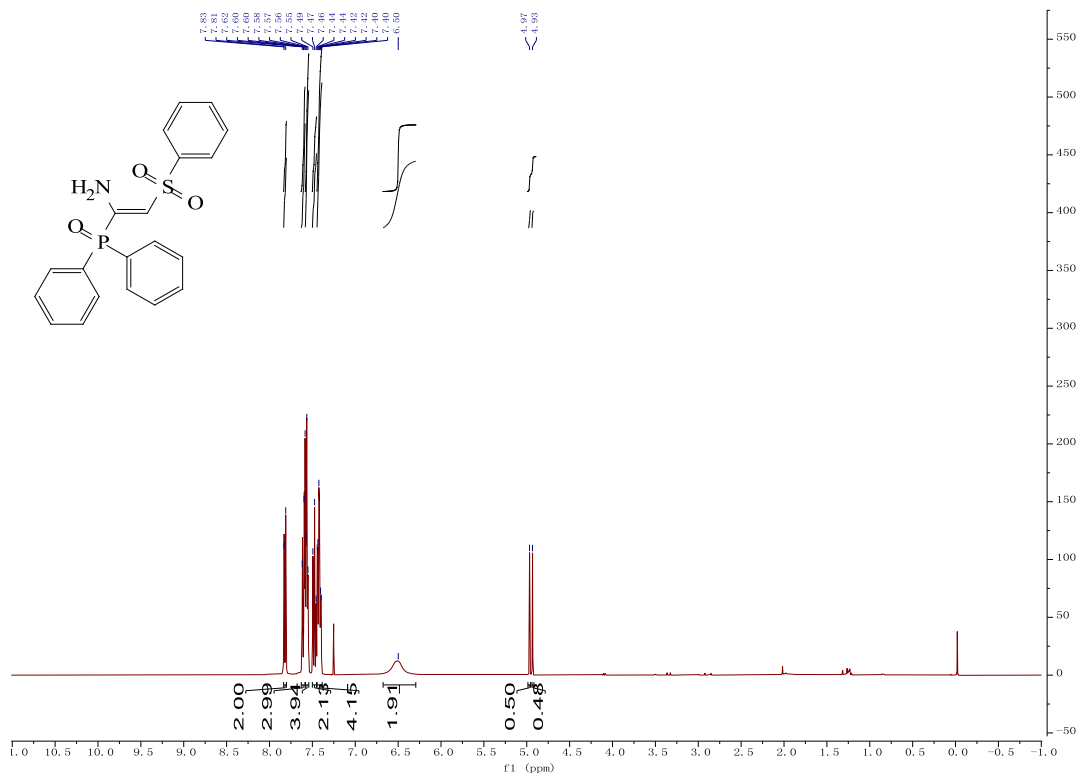

$^{13}\text{C}$  NMR (101 MHz,  $\text{CDCl}_3$ )

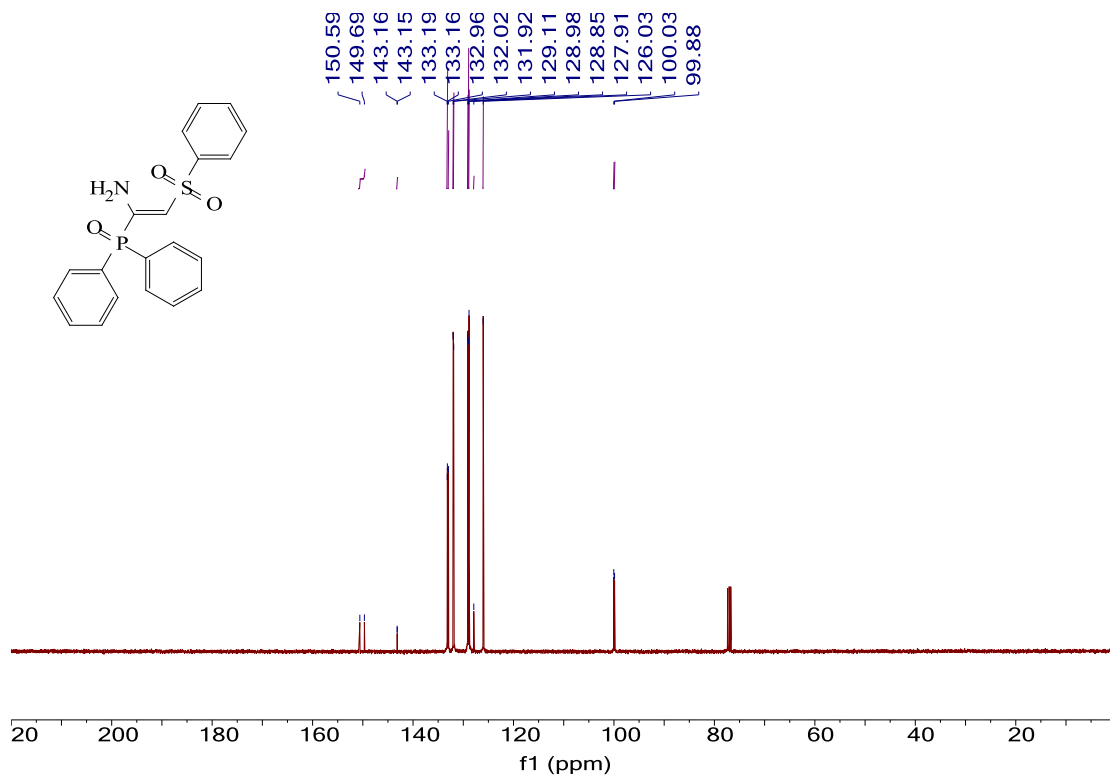

$^{31}\text{P}$  NMR (162 MHz,  $\text{CDCl}_3$ )

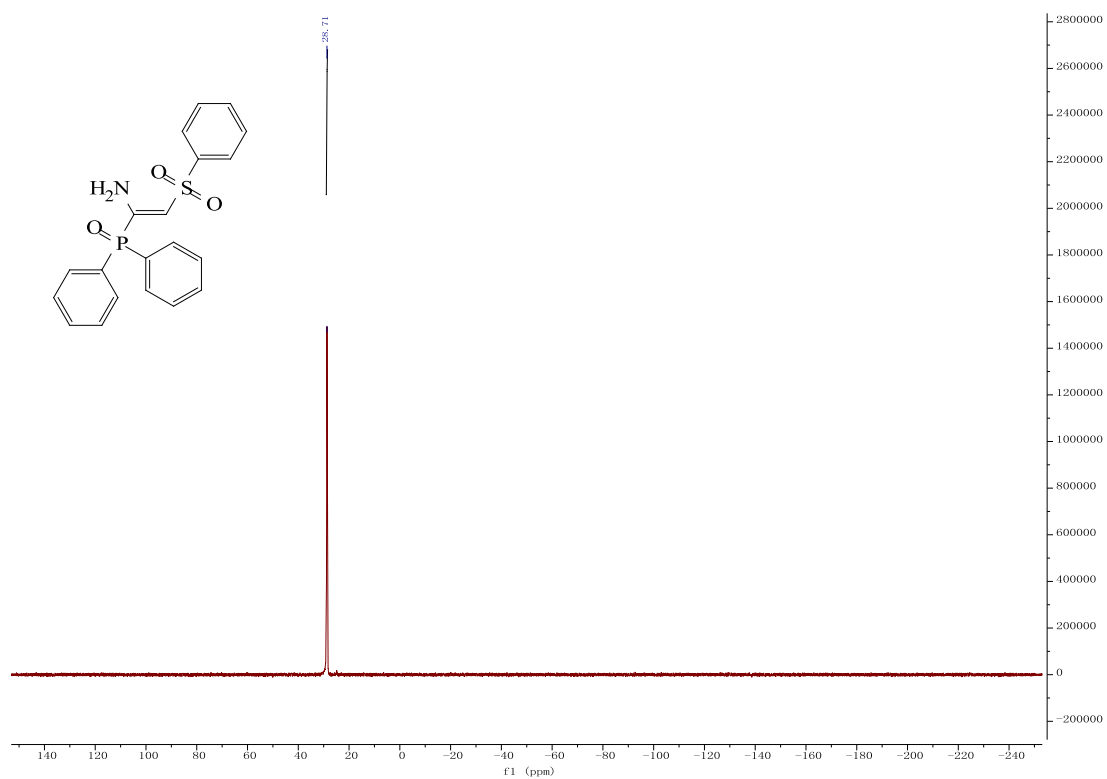

**Amino-2-(methylsulfonyl)vinyl)diphenylphosphine oxide) (30)**

$^1\text{H}$  NMR (400 MHz,  $\text{CDCl}_3$ )

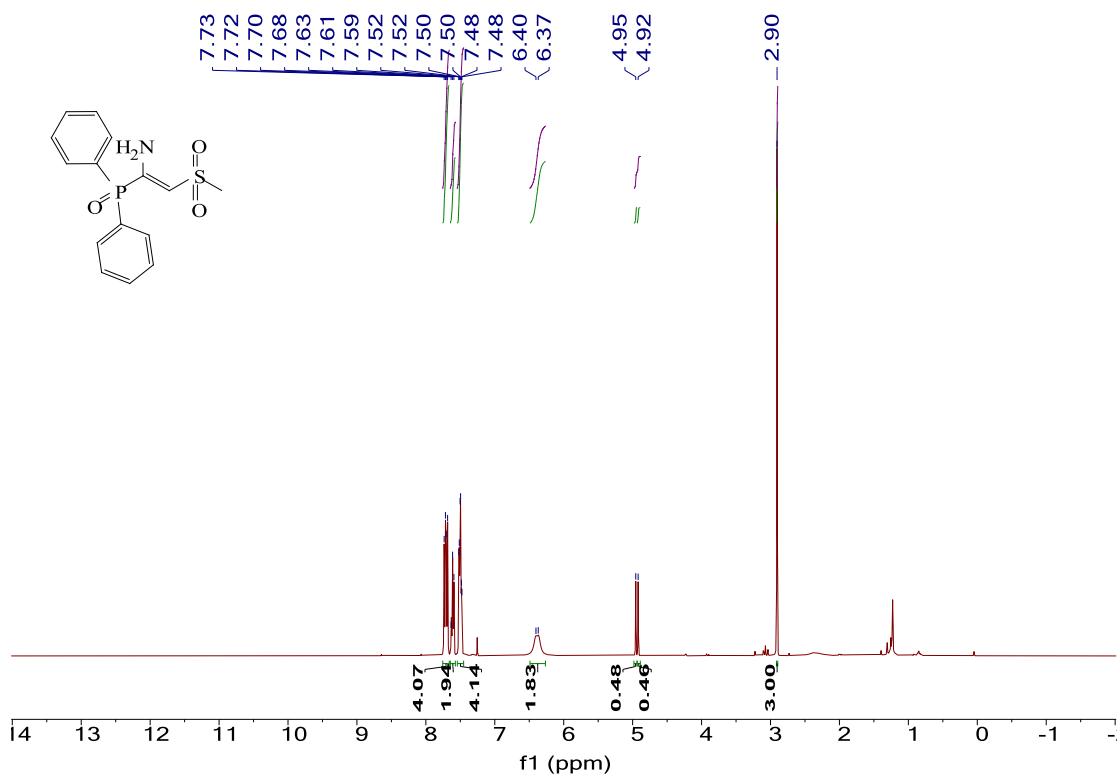

$^{13}\text{C}$  NMR (101 MHz,  $\text{CDCl}_3$ )

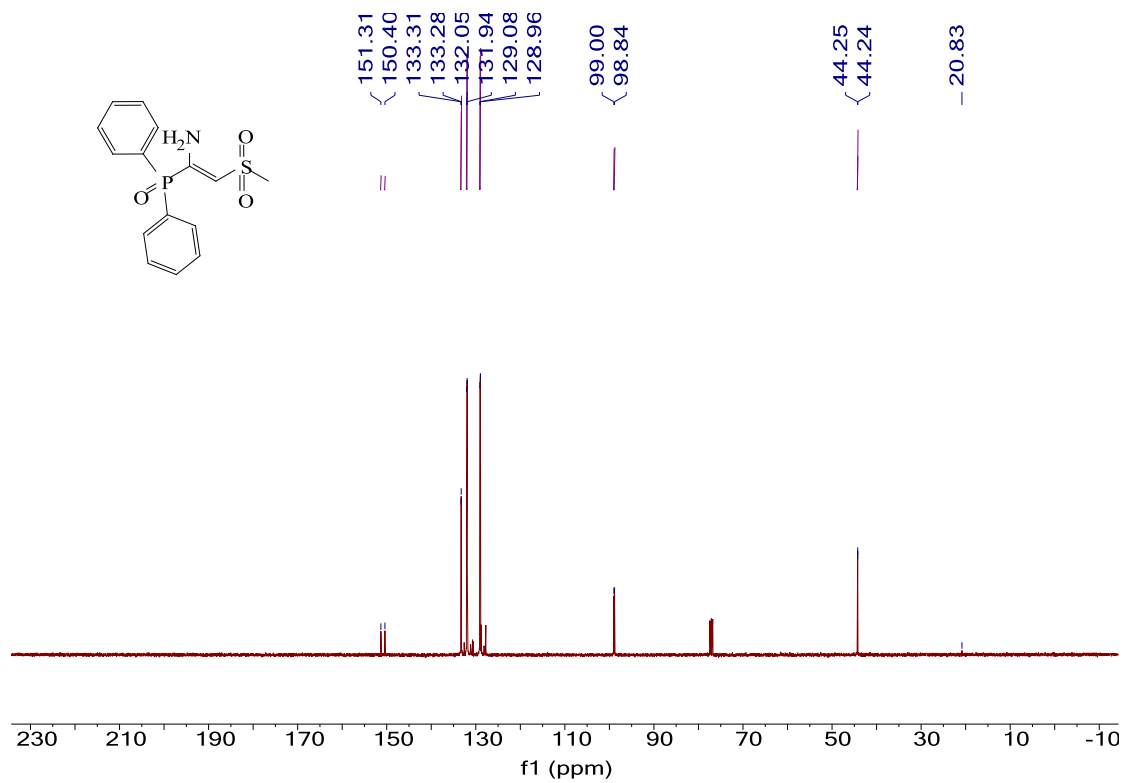

$^{31}\text{P}$  NMR (162 MHz,  $\text{CDCl}_3$ )

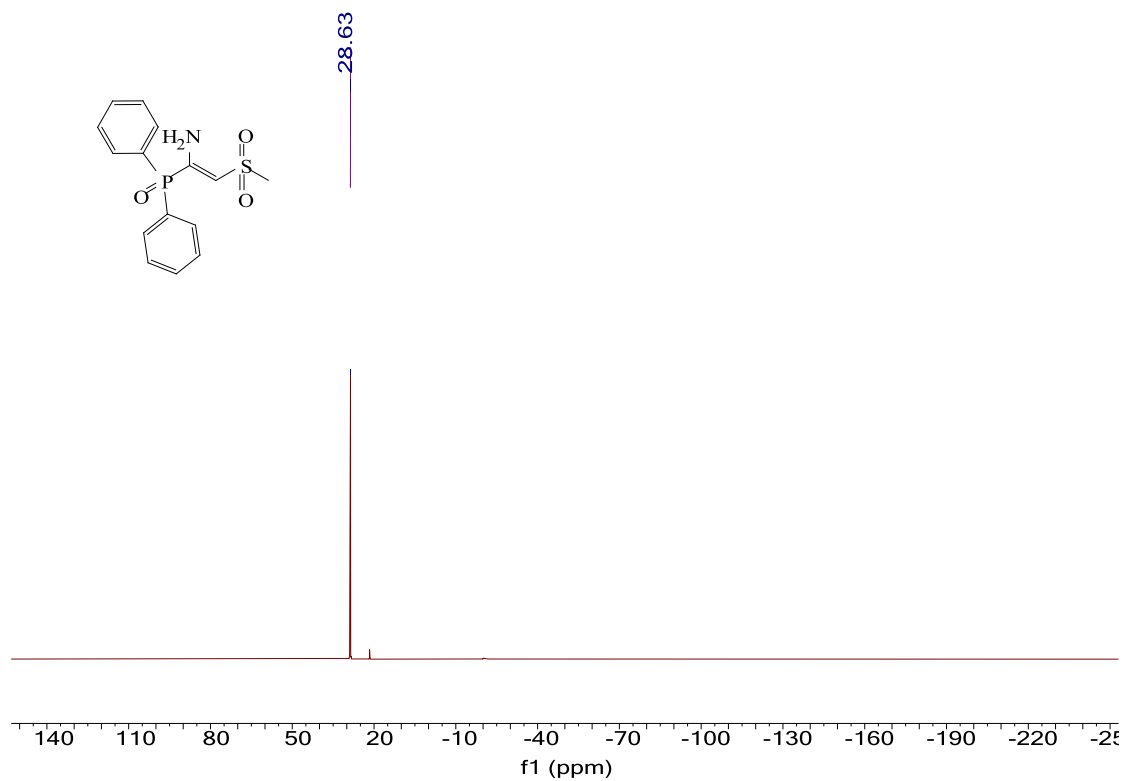

### 3-Amino-3-(diphenylphosphoryl)acrylonitrile (31)

$^1\text{H NMR}$  (400 MHz,  $\text{CDCl}_3$ )

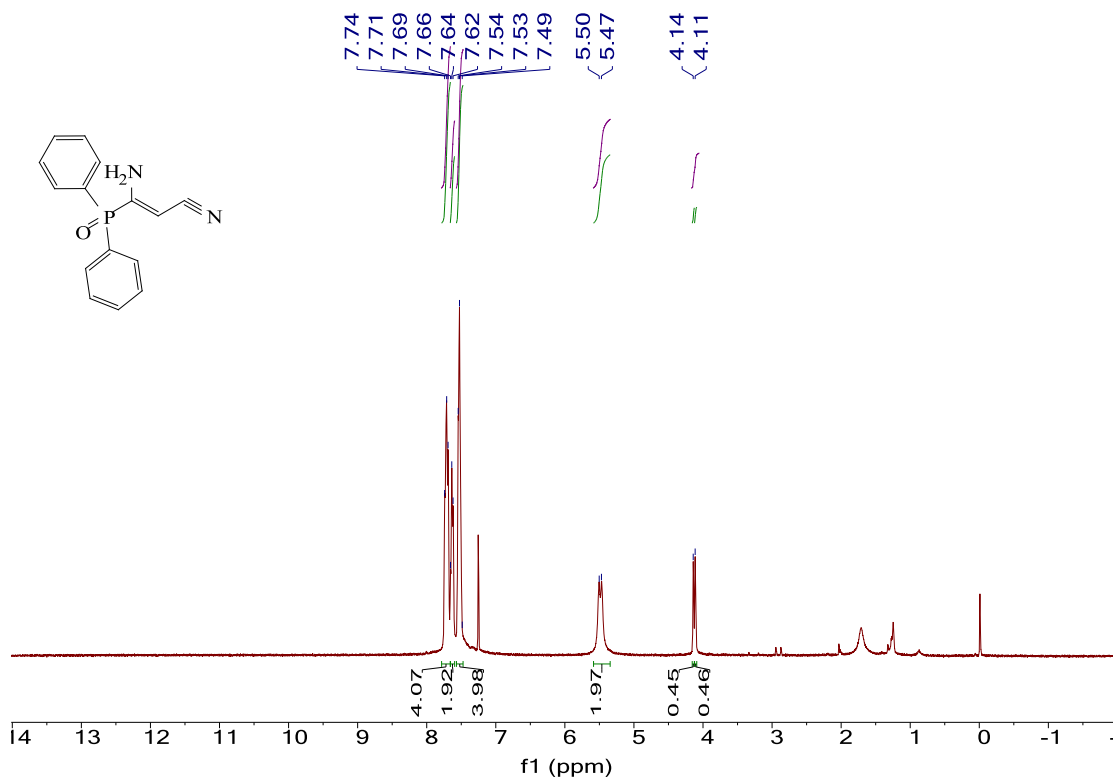

$^1\text{H NMR}$  (400 MHz,  $\text{DMSO-}d_6$ )

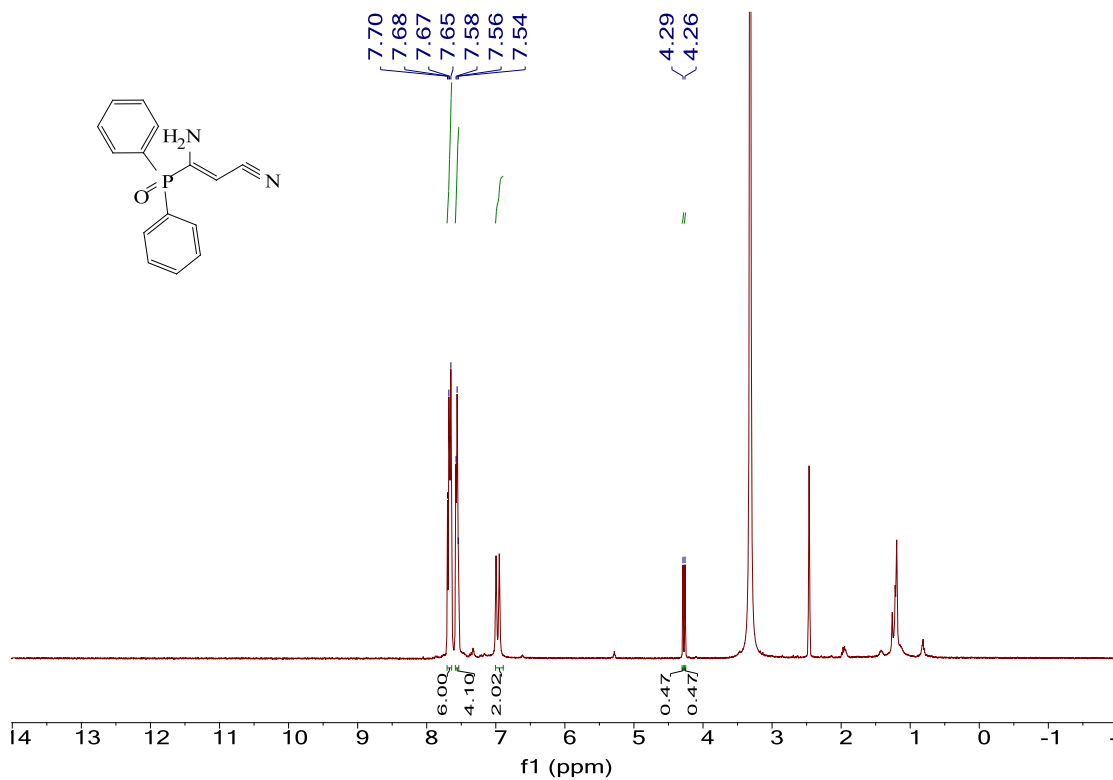

$^{13}\text{C}$  NMR (101 MHz,  $\text{CDCl}_3$ )

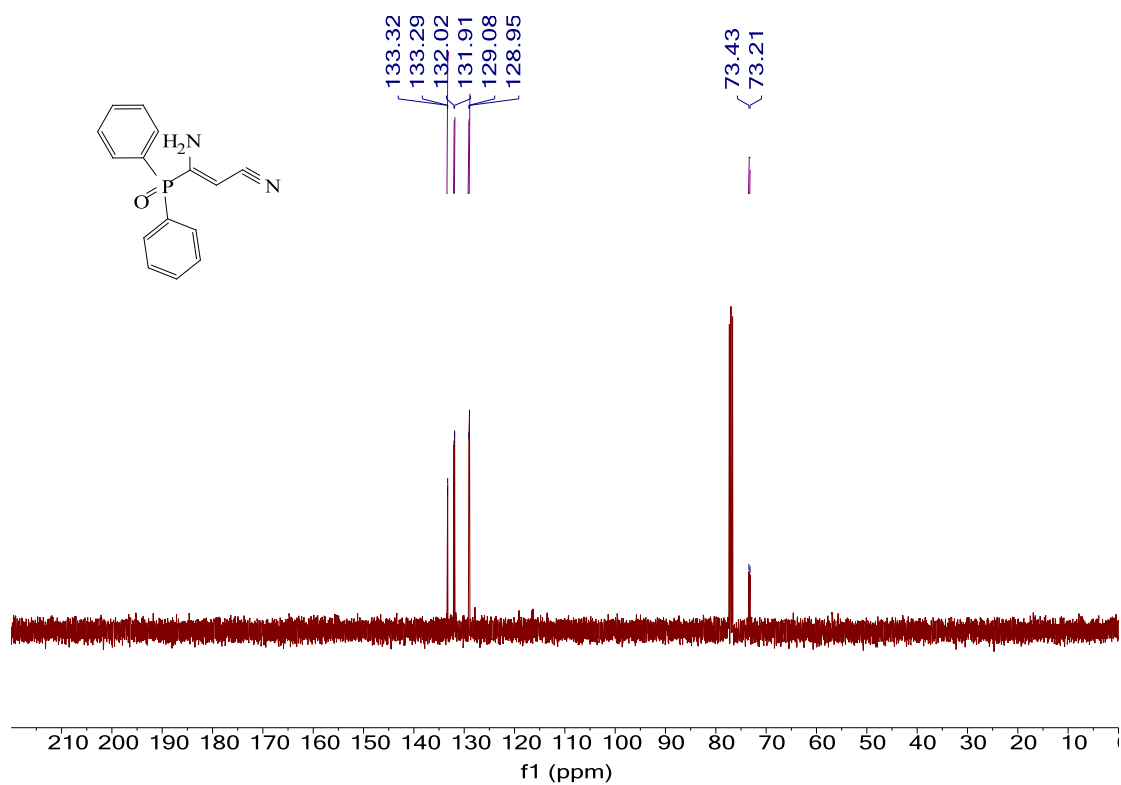

$^{31}\text{P}$  NMR (162 MHz,  $\text{CDCl}_3$ )

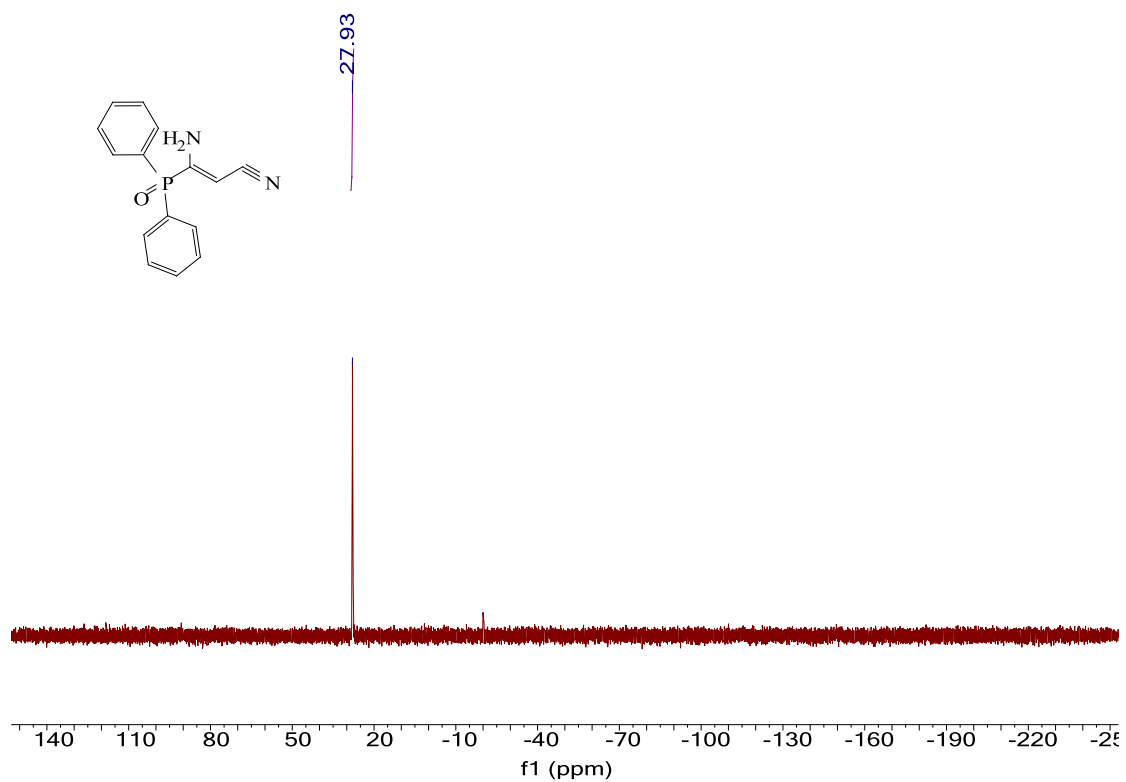



# Diethyl (2-amino-2-(diphenylphosphoryl)vinyl)phosphonate (32)

$^1\text{H}$  NMR (400 MHz,  $\text{CDCl}_3$ )

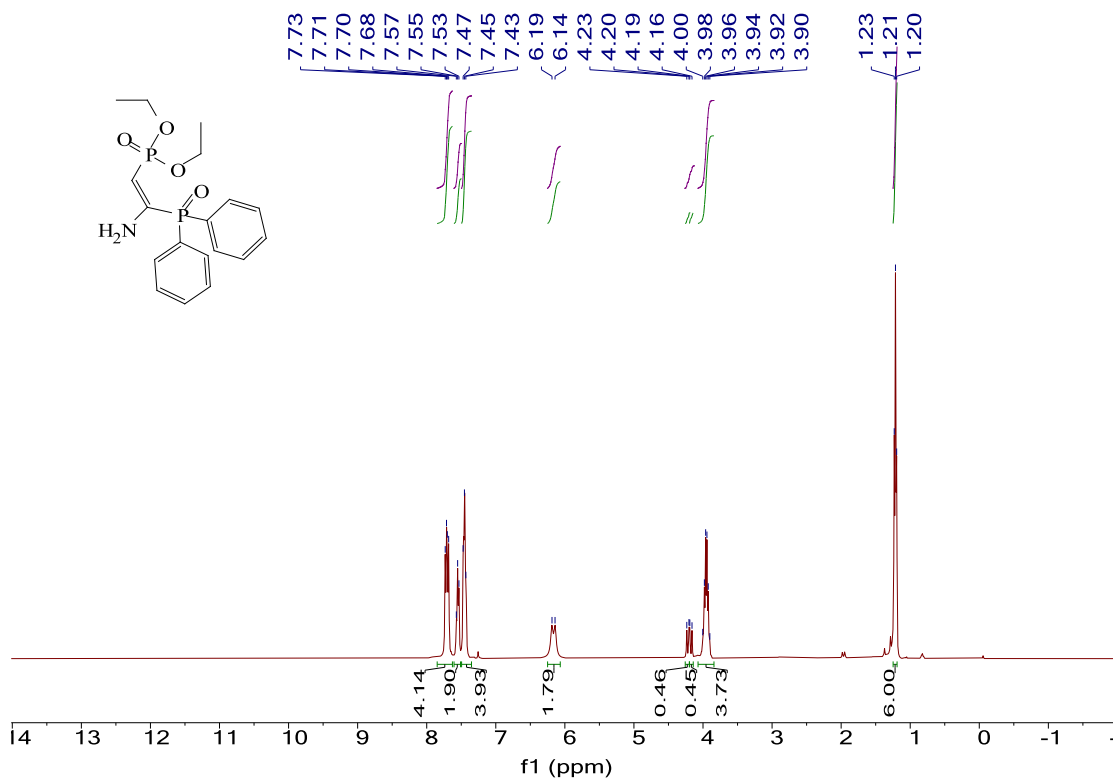

$^{13}\text{C}$  NMR (101 MHz,  $\text{CDCl}_3$ )

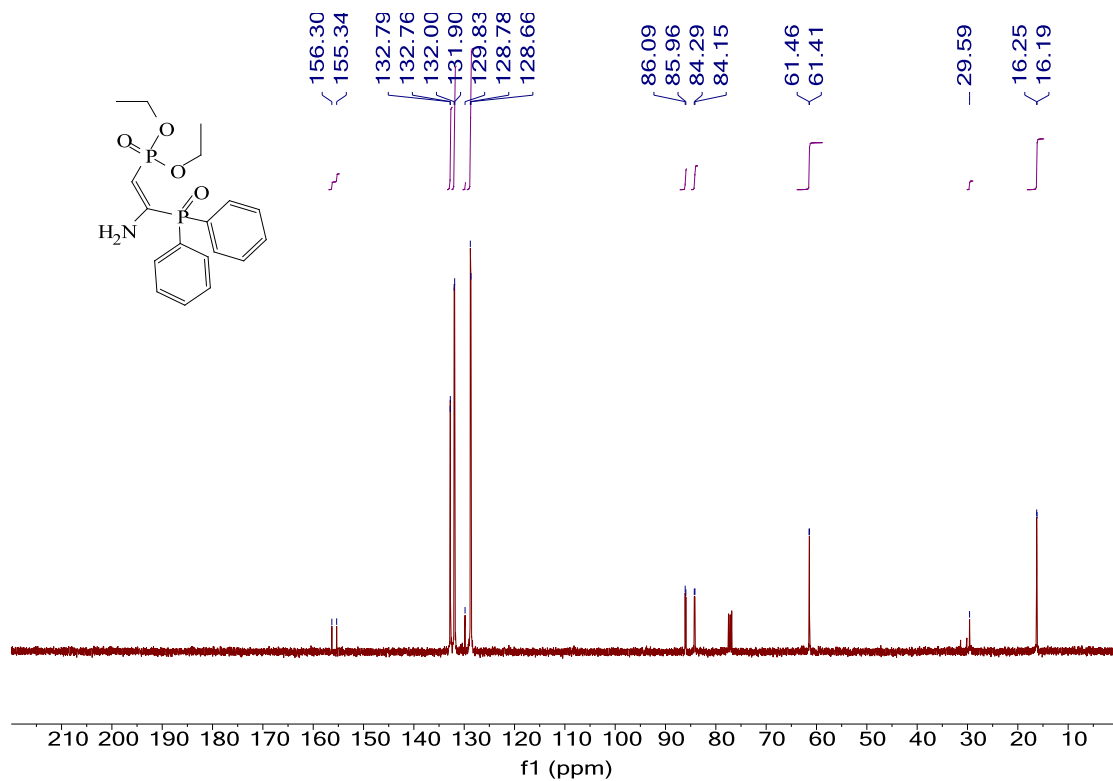

<sup>31</sup>P NMR (162 MHz, CDCl<sub>3</sub>)

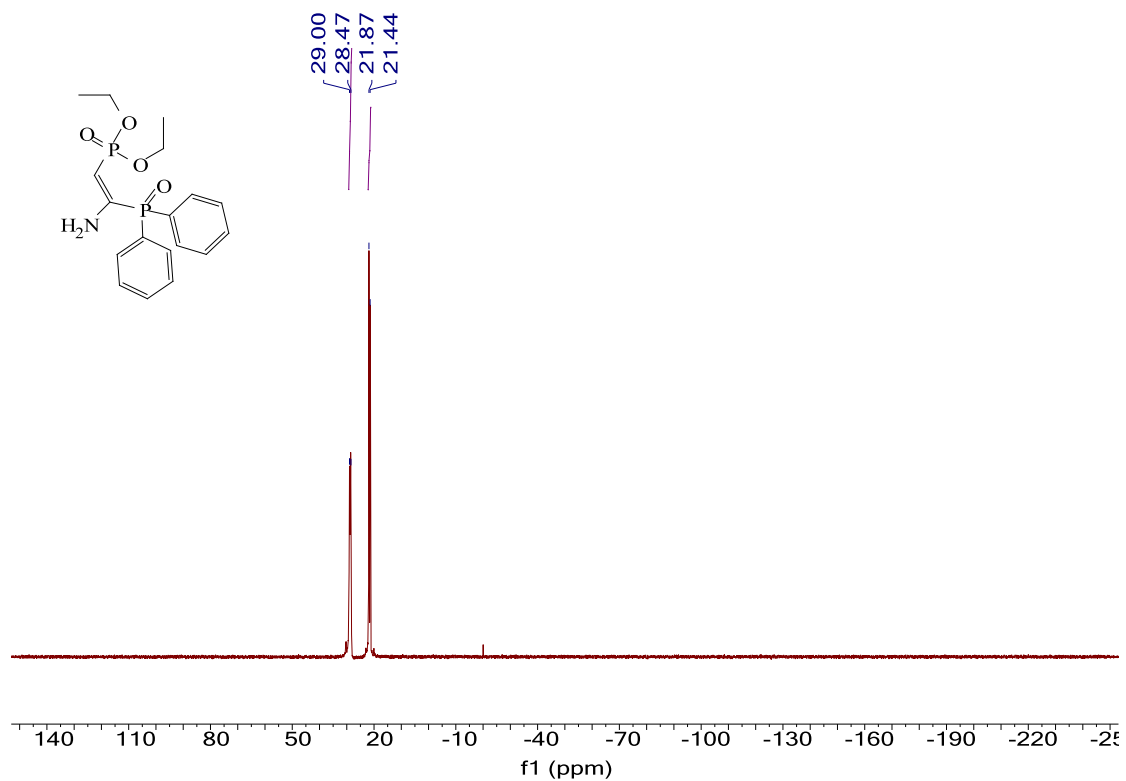

**3-(Amino(diphenylphosphoryl)methylene)isochroman-1-one (33).**

<sup>1</sup>H NMR (400 MHz, CDCl<sub>3</sub>)

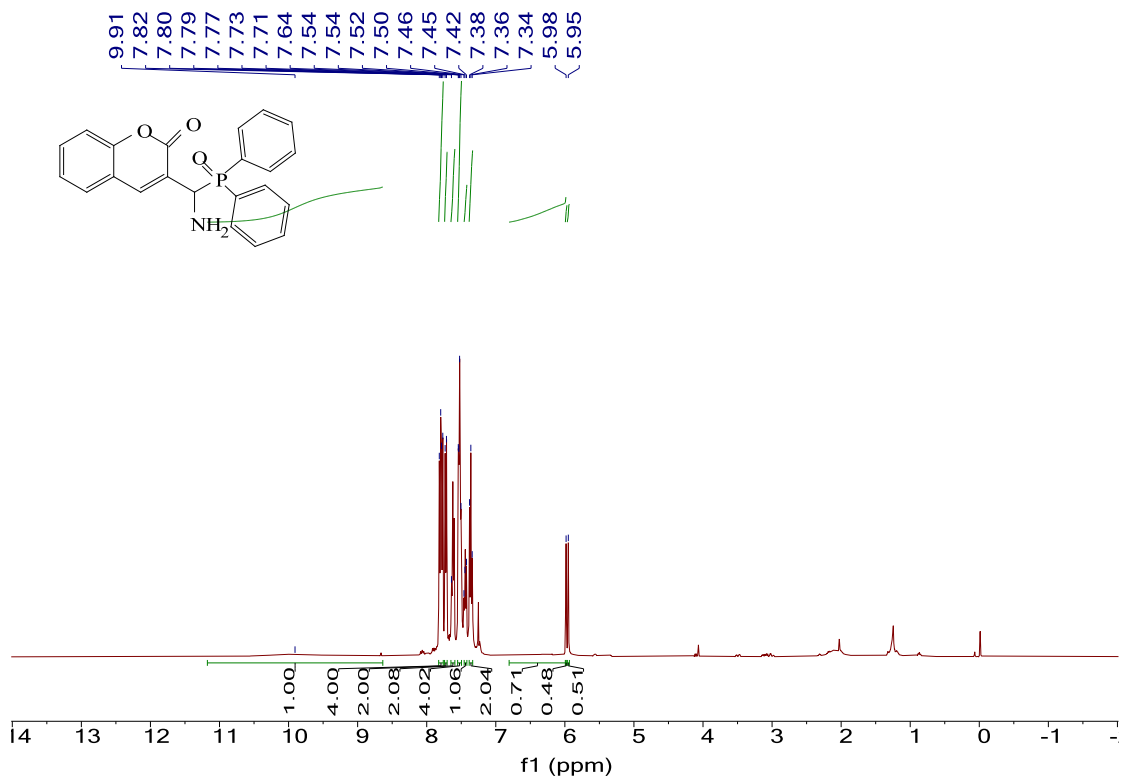

$^{13}\text{C}$  NMR (101 MHz,  $\text{CDCl}_3$ )

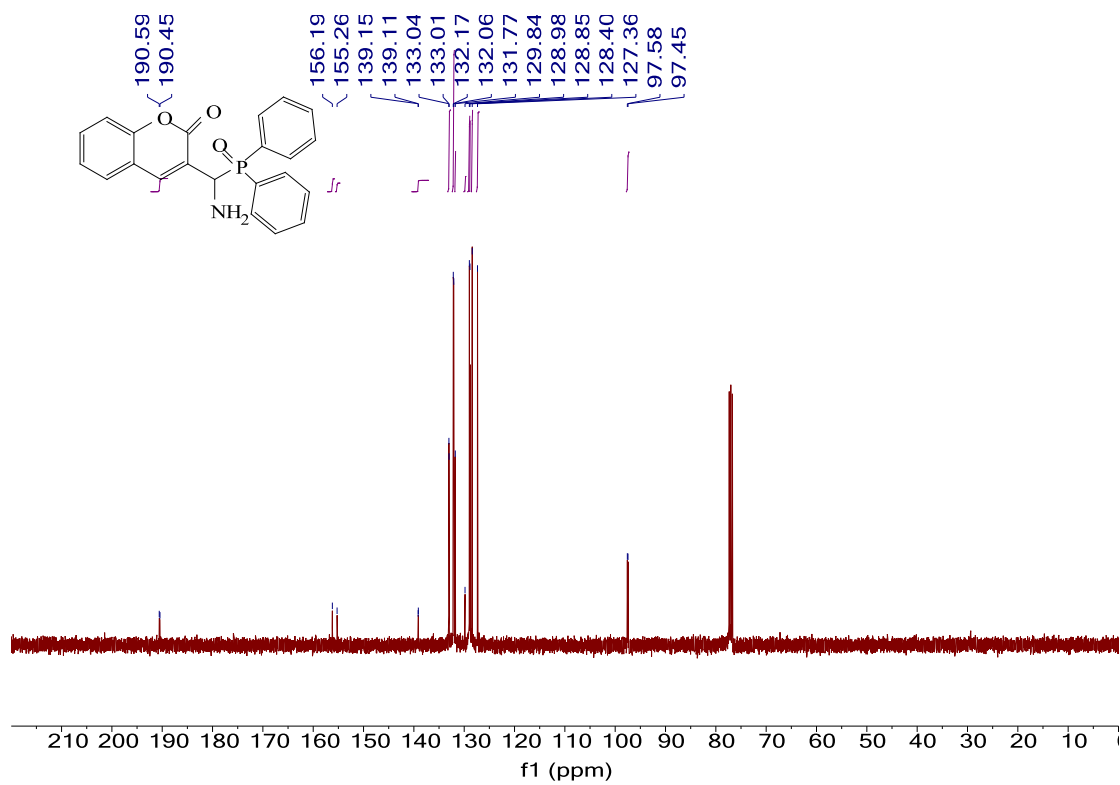

$^{31}\text{P}$  NMR (162 MHz,  $\text{CDCl}_3$ )

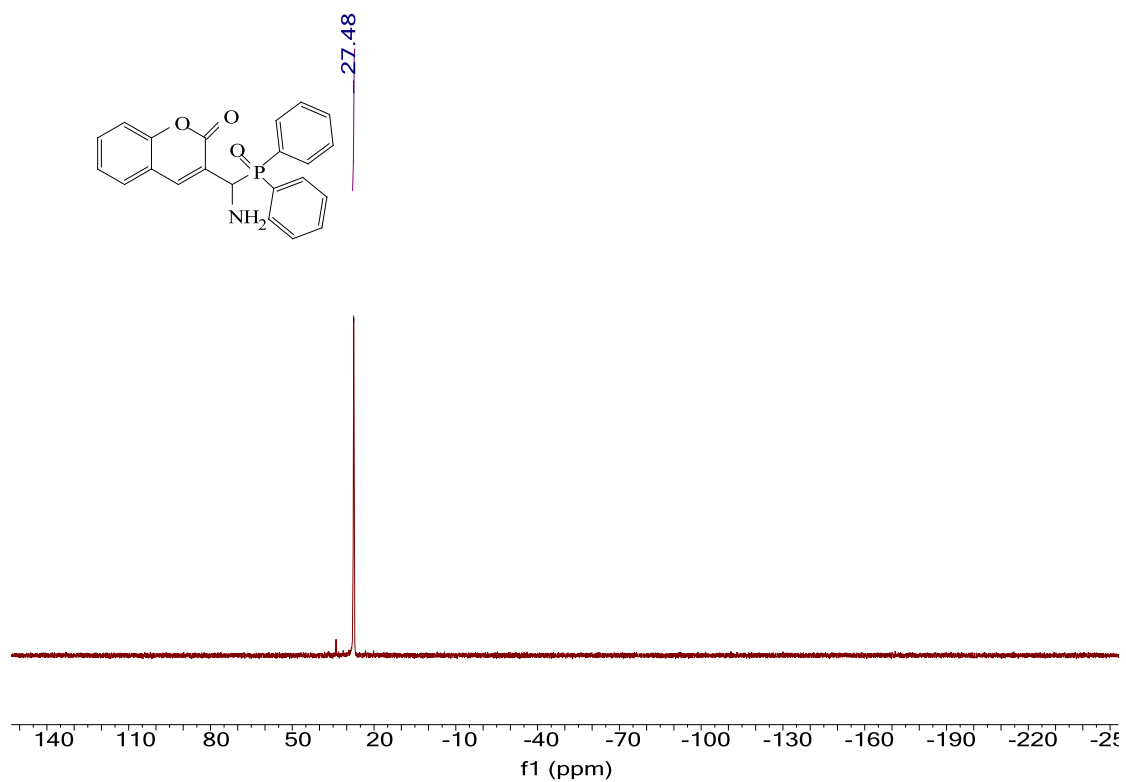

**3-oxo-3-phenylpropanenitrile-2,2-d2 (34)**

$^1\text{H NMR}$  (400 MHz,  $\text{CDCl}_3$ )

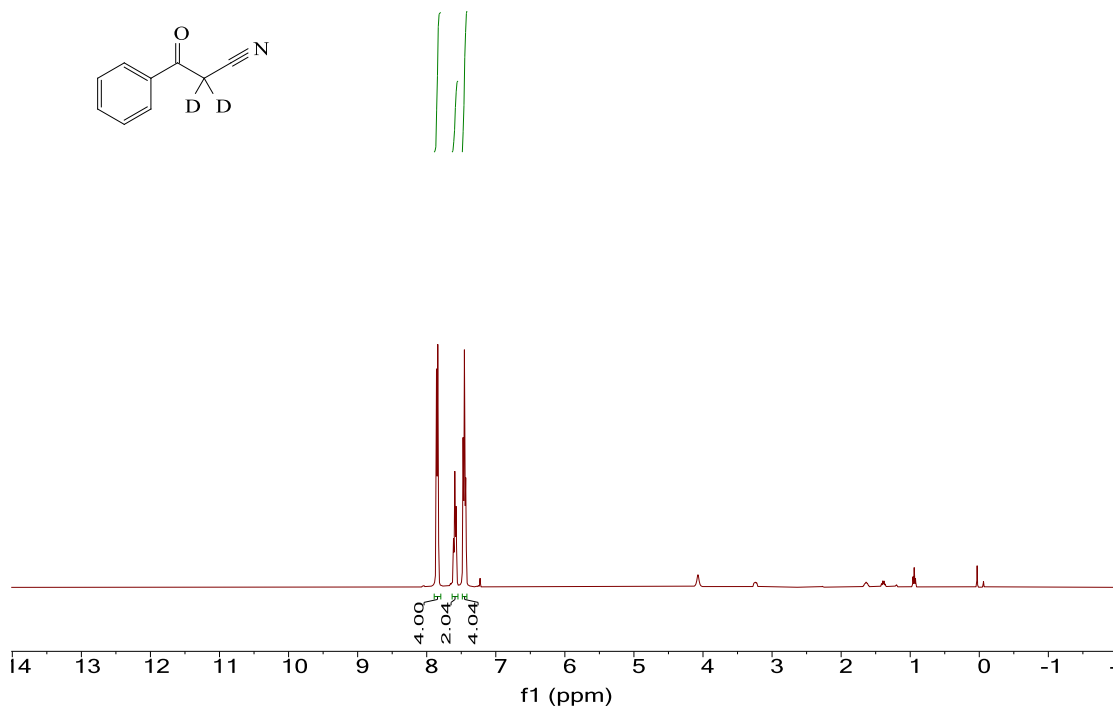

**3-amino-3-(diphenylphosphoryl)-1-phenylprop-2-en-1-one-2-d (35)**

$^1\text{H NMR}$  (400 MHz,  $\text{CDCl}_3$ )

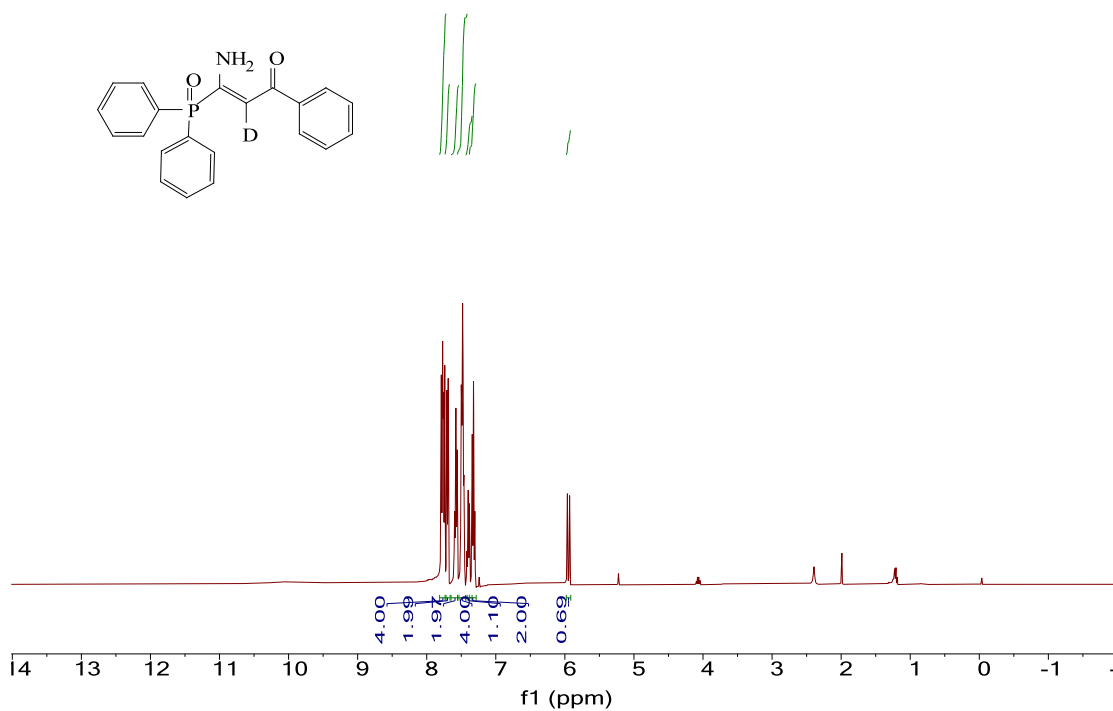

Supplement: d4ob00489b1.pdf [file d4ob00489b1.pdf]
